# Supplementary material for: Variables Associated With Intravenous Rehydration and Hospitalization in Children With Acute Gastroenteritis: A Secondary Analysis of 2 Randomized Clinical Trials
Source: PubMed Central journal article supplement (PMC8056281; doi:10.1001/jamanetworkopen.2021.6433), 2021-04-19
Supplement: jamanetwopen-e216433-s001.pdf [file jamanetwopen-e216433-s001.pdf]

1 **Impact of Emergency Department Probiotic Treatment of Pediatric**  
2 **Gastroenteritis: Randomized Controlled Trial**

3  
4 **Sponsor:** The University of Calgary

**Principal Investigator:** Dr. Stephen Freedman  
The Alberta Children's Hospital

**Co-Investigators:**

|                                                             |                                                      |
|-------------------------------------------------------------|------------------------------------------------------|
| Dr. David Johnson<br>Alberta Children's Hospital            | Dr. Serge Gouin<br>CHU Ste-Justine                   |
| Dr. Ken Farion<br>Children's Hospital of Eastern<br>Ontario | Dr. Katrina Hurley<br>IWK Health Centre              |
| Dr. Suzanne Schuh<br>The Hospital for Sick Children         | Dr. Philip Sherman<br>The Hospital for Sick Children |
| Dr. Andrew Willan<br>The Hospital for Sick Children         | Dr. Marc Gorelick<br>Medical College of Wisconsin    |
| Dr. David Schnadower<br>Washington University               | Dr. Ron Goeree<br>McMaster University                |
| Dr. Yaron Finkelstein<br>The Hospital for Sick Children     | Dr. Linda Chui<br>University of Alberta              |
| Dr. Bonita Lee<br>University of Alberta                     | Dr. Xiao-Li Pang<br>University of Alberta            |
| Dr. Marie Louie<br>University of Calgary                    | Dr. Alberto Nettel-Aguirre<br>University of Calgary  |
| Dr. Naveen Poonai<br>London Children's Hospital             |                                                      |

**Funding Agency:** Canadian Institutes for Health  
Research (CIHR)

**Other Support:** Lallemand Health Solutions  
Dr. Thomas Tompkins

**Protocol Version:** 7.0  
**Protocol Date:** November 1, 2017

## 1.0 THE NEED FOR A TRIAL

### 1.1 WHAT IS THE PROBLEM TO BE ADDRESSED?

The burden of acute gastroenteritis (AGE) on children and their families continues to be enormous. **It accounts for 1.7 million pediatric emergency department (ED) visits annually in the United States and nearly 240,000 in Canada.**<sup>1</sup> Children often suffer from prolonged<sup>2</sup> and severe illness; amongst hospitalized Canadian children, 19% have clinical sepsis, 7% seizures and 4% require intensive care unit admission.<sup>3</sup> In a study that we conducted at 11 Canadian EDs, 51% of children experienced moderate to severe disease.<sup>4</sup> Parents rate such episodes as being equivalent to a 10 day admission (moderate) and persistent moderate hearing loss (severe).<sup>5</sup> The burden is augmented by the 50% household transmission rate<sup>2,6</sup> and 42% prolonged work absenteeism rate.<sup>7</sup> Apart from supportive care, **health-care providers have little to offer to relieve suffering.**<sup>8</sup>

Probiotics, which are defined as viable microbial preparations that have a beneficial effect on the health of the host,<sup>9</sup> represent a rapidly expanding field. While they are available as over-the-counter products, according to the National Institutes of Health, the Food and Drug Administration has not yet approved a single agent for any health claims.<sup>10</sup> Further, a 2012 meta-analysis concluded that there is limited data to support their indications and no published pediatric gastroenteritis trials reported on side effects.<sup>11</sup> Thus, understanding the benefits and side effects of probiotics is crucial before widespread use can be endorsed. Although probiotic clinical trials have been performed,<sup>12</sup> only one (still unpublished) has been ED based.<sup>13</sup> Most studies to date have been significantly flawed and **guidelines do NOT endorse their use stating that well-controlled human trials are needed.**<sup>14</sup> Consequently, we and others have found that they are rarely used in clinical practice.<sup>4,15-19</sup> Reasons cited include (1) questionable clinical meaning to the outcomes evaluated thus far; (2) absence of studies in the appropriate patient population, and (3) a lack of confidence in the quality of probiotic agents studied.<sup>19</sup>

**Our proposed definitive trial is necessary because it addresses the weaknesses and deficiencies in prior studies.** We (1) focus on the burden of disease and outcomes of relevance to the infected child and his/her caregiver, (2) study outpatient children (>95% of those infected), (3) employ rigorous methodology and a sample size significantly larger than any prior study,<sup>12</sup> (4) will evaluate the side effect profile and conduct subgroup analyses by etiologic agent, and (5) will be free of bias (i.e. industry funding).<sup>20,21</sup> These elements have not been previously addressed by any pediatric probiotic clinical trial. We will additionally investigate **several novel domains:** (1) the economics of widespread probiotic use and (2) the in vivo impact on immunoglobulin secretion.

**This study will address (1) the needs of the medical community, which is aware of the widening gap between the number of important pediatric and adult trials<sup>22,23</sup> and (2) the interest of caregivers in “probiotics”** - 71% are aware of the term; 31% believe they may be beneficial in children with diarrhea, and > 90% would administer a probiotic if it could make their child better.<sup>24</sup> Furthermore, our pilot study has provided promising preliminary data and has proven the feasibility of our methods. Thus we are poised to conduct a randomized controlled trial (RCT) that will definitively determine if meaningful benefits are derived from probiotic use and will provide critical information regarding their mechanism of action. This information will impact on practice, the burden of disease, and ensure that children receive the best care possible. The results of our proposed RCT will enable guidelines to either clearly endorse or recommend against the routine use of a probiotic agent in children with AGE. **We also hypothesize that the therapeutic benefits of probiotics in children with AGE vary by infecting pathogen** (Appendix 1 Pathogen-Specific Effectiveness). We have assembled a team to bridge the gap between the clinical RCT team, molecular diagnostics, and immunologic to quantify the pathogen-specific effects of probiotics. The latter is likely because there are distinct mechanisms (e.g. invasive, inflammatory, non-inflammatory) by which pathogens cause clinical symptoms.<sup>25</sup> Similarly, probiotic effects are exerted through multiple modes-of-action (e.g. direct antimicrobial activity, competitive exclusion, immune response stimulation, inhibition of virulence gene or protein

54 expression).<sup>26</sup> *The simultaneous evaluation of pathogen-specific effects on clinical, microbiological and*  
55 *immunological levels has not previously been performed.*

56  
57 The knowledge gained through this multi-faceted approach will inform understanding of the probiotic-  
58 host-pathogen interactions that are responsible for improved clinical outcomes in children with AGE.  
59 Our study population, outpatient children, is both the main group of patients who suffer from AGE as  
60 well as the main consumer of probiotics. Thus, our findings will be relevant and ready for translation  
61 into clinical care while simultaneously opening up avenues for future research.

## 62 63 **1.2 WHAT ARE THE PRINCIPAL RESEARCH QUESTIONS TO BE ADDRESSED?**

64 **Hypotheses:** In children aged 3-48 months presenting to an ED with less than 72 hours of AGE like  
65 symptoms, compared with placebo, the administration of a probiotic agent:

- 66 1. Will result in a significantly lower proportion of children developing moderate to severe disease over  
67 the subsequent 2 weeks.
- 68 2. Will not be associated with a significantly greater occurrence of minor side effects.
- 69 3. Will be associated with a greater increase in secretory IgA (sIgA).
- 70 4. Will have varying effects based on the etiologic pathogen, given the diverse underlying  
71 pathophysiologic processes induced by the causative agents<sup>25</sup> and the multiple mechanisms of action  
72 of probiotics.<sup>26</sup>

### 73 74 **Clinical Efficacy:**

75 **Primary Question:** For previously healthy children, ages 3-48 months, who present to an ED with less  
76 than 72 hours of AGE like symptoms, is the proportion who develop *moderate to severe disease*  
77 [Modified Vesikari Score (MVS)  $\geq$  9] following ED evaluation, significantly different in those who  
78 receive a probiotic agent (Lacidofil) compared to those who receive placebo?

79 **Secondary Questions:** In this group of patients, amongst those receiving active treatment versus placebo:

- 80 1. Is there a difference in the (a) *duration of diarrhea* or (b) *duration of vomiting*?
- 81 2. Is there a difference in the *proportion who require an unscheduled health care provider visit*?
- 82 3. Is there a difference in the *effectiveness of treatment based on the infecting pathogen*?

### 83 84 **Side Effect Profile:**

85 **Question:** In this group of patients, is the proportion that experiences a *side effect* (e.g. bloating, fever,  
86 abdominal distention, rash) significantly different in those who receive Lacidofil compared to placebo?

### 87 88 **Mechanism of Action:**

89 **Question:** In this group of patients, are fecal sIgA levels 5 days and 4 weeks after the initiation of  
90 treatment higher in those who receive Lacidofil compared to those who receive placebo?

### 91 92 **Microbiologic – Stool Pathogen-Specific Load:**

93 **Question:** In this group of patients, is there a difference in the pathogen specific reduction in stool  
94 pathogen load in those who receive Lacidofil compared to those who receive placebo?

## 95 96 **1.3. WHY IS A TRIAL NEEDED NOW? Definitive data is lacking to guide clinical decision**

97 **making and most guidelines do not endorse routine probiotic use.**<sup>14,27</sup> Hence, probiotics are rarely  
98 prescribed by North American physicians.<sup>4,19,28</sup> **However, there are current trends that obligate an**  
99 **urgent assessment.** First, since probiotics are sold as food supplements, manufacturers can encourage  
100 their use while their relevance has yet to be established.<sup>29</sup> Manufacturers have embarked on aggressive  
101 campaigns making health claims that may not be supported by rigorous research.<sup>30-33</sup> At stake is the  
102 world-wide probiotic market which is growing at 13% annually and is valued at \$33 billion/year.<sup>34</sup>

103 Second, North American and European government agencies remain concerned about their value and  
104 safety.<sup>35-37</sup> Third, some institutions are now recommending the routine use of probiotics.<sup>38</sup> Fourth,  
105 parents of affected children are often providing probiotics.<sup>17</sup> **We are therefore concerned that**  
106 **probiotic consumption is increasing in the absence of solid evidence. This underscores the**  
107 **necessity to conduct this definitive trial without delay. Prior research on the topic suffers from the**  
108 **following important shortcomings:**

109  
110 **1-Outcome measures used to date have limited clinical meaning:** Studies have focused on individual  
111 symptoms (e.g. stool duration), without consideration of the full picture of the illness<sup>39</sup> (e.g. fever,  
112 vomiting, ED visits, hospitalization). A 2010 Cochrane Review concluded that the instruments  
113 employed to date are heterogeneous, lack evidence of validity and focus on outcomes that are not  
114 important to participants.<sup>40</sup> Thus, the significance of conclusions reached are questioned.<sup>41,42</sup> **We will**  
115 **employ a validated burden of disease score and will focus on outcomes of relevance to children**  
116 **and their caregivers to enable an evidence-based conclusion to be drawn.**<sup>12</sup>

117  
118 **2-Populations studied to date do not apply to the majority of children:** Though 95% or more of  
119 children are treated as outpatients,<sup>43</sup> only a handful of small studies have focused on outpatients.<sup>41</sup>  
120 Inpatient research cannot be extrapolated to outpatients, as hospitalized children are more likely to  
121 benefit from probiotics.<sup>12,44,45</sup>

122  
123 **3-Quality of studies to date is inadequate:** Most are small, single-centre<sup>46</sup> and have been conducted by  
124 pharmaceutical companies.<sup>47</sup> Many negative probiotic studies remain unpublished.<sup>48</sup> Design issues are a  
125 concern: in a 2010 Cochrane Review, only 16% of studies adequately reported the 4 key methodological  
126 assessment parameters (i.e. allocation sequence generation, concealment, blinding, and loss to follow-  
127 up).<sup>12</sup> Of 175 outstanding dietary research articles selected over the past 7 years by the National  
128 Institutes of Health, only 2 addressed probiotics and none AGE.<sup>49</sup> **Hence, high quality studies funded**  
129 **by non-vested parties that assess outcomes of interest to children and parents are needed.**<sup>47,50</sup>

130  
131 **4-Inadequate data available from research in the relevant patient population:** No studies to date have  
132 evaluated the impact of probiotics on children with gastroenteritis treated in primary care. Only a single  
133 ED study has been performed: 129 children received a probiotic or placebo agent and the authors found  
134 statistically insignificant trends towards a reduction in stool frequency (30% fewer diarrheal stools) and  
135 duration (median 14 hours fewer of diarrhea) amongst those administered a probiotic agent.<sup>51</sup> The  
136 groups did not differ in terms of return to normal activities, return for medical care or the need for  
137 hospitalization. In light of these potentially important trends, the conclusions of systematic reviews, and  
138 the burden of disease – **there are 1.7 million ED visits in the United States and 240,000 ED visits**  
139 **annually in Canada for pediatric gastroenteritis – conclusive data regarding the routine outpatient**  
140 **use of probiotics in North American children with AGE are needed.**<sup>1</sup>

141  
142 **5-Knowledge about the in-vivo Mechanism of Action in AGE is lacking:** Our understanding of the  
143 mechanism of action of probiotics is limited.<sup>52,53</sup> Possible methods of action are (1) *Microbiologic* – by  
144 improving intestinal mucosal permeability,<sup>54</sup> modifying the microbiota, inhibiting adherence of  
145 pathogenic bacteria, and competing for nutrients;<sup>55</sup> (2) *Immunologic* – by upregulating gene  
146 expression,<sup>56</sup> inhibiting the activation of pro-inflammatory pathways,<sup>57</sup> increasing the concentrations of  
147 anti-inflammatory cytokines,<sup>58</sup> and promoting local antigen-specific immunoglobulin A (IgA)  
148 responses.<sup>59</sup> **Studies incorporating both clinical outcomes and the measurement of biomarkers**  
149 **potentially related to the clinical effects are desperately needed.**<sup>12,60</sup>

150  
151 **6-Lack of Probiotic Quality Control:** As reported in an RCT comparing 5 probiotic products,<sup>61</sup> not all  
152 are equally effective. Strain, viability, and dose are important factors.<sup>62</sup> In North America, most have

153 never been clinically evaluated,<sup>63</sup> some claim to contain organisms that do not exist,<sup>64</sup> others do not  
154 match their labeled microbiologic specifications. Our work with Lacidofil has demonstrated that it  
155 reduces epithelial injury,<sup>65,66</sup> prevents bacterial binding, invasion and translocation,<sup>66,67</sup> reduces gastric  
156 inflammation,<sup>68</sup> attenuates colonic disease and dysfunction,<sup>66,69,70</sup> improves intestinal barrier function,<sup>71</sup>  
157 normalizes corticosterone release,<sup>70</sup> and plays an immunomodulatory role.<sup>66</sup> As a mandatory, yet rarely  
158 performed research requirement,<sup>12,72</sup> **we have obtained independent analyses to confirm the viable**  
159 **colony forming unit (CFU) count and microbe identity (Appendix 2-Lacidofil).** We have obtained  
160 Health Canada approval for our pilot which has guided this proposal's design. **Hence our study will**  
161 **provide evidence about a high quality product available in Canada.**<sup>73</sup>

162  
163 **1.4 RELEVANT SYSTEMATIC REVIEWS AND NEED FOR THIS TRIAL IN LIGHT OF**  
164 **THESE REVIEWS.** Meta-analyses<sup>12,44,47,74,75</sup> are encouraging however, they (1) question the clinical  
165 relevance of the outcomes evaluated,<sup>12,41,47</sup> (2) conclude that publication bias is a concern, and (3)  
166 advocate for a large RCT,<sup>28</sup> funded by an unbiased agency, in an ambulatory pediatric population.<sup>47</sup> A  
167 2010 Cochrane Review reported reductions in the mean duration of diarrhea (25 hours), diarrhea lasting  
168  $\geq 4$  days (risk ratio 0.41), and stool frequency on day 2 (mean difference 0.8).<sup>12</sup> Given the limited clinical  
169 relevance of these findings, and the significant between-study heterogeneity, the authors of this and  
170 other reviews have called for studies that (1) evaluate specific regimens in large numbers of participants,  
171 (2) identify infectious causes,<sup>41</sup> (3) present data separately for important subgroups, (4) include  
172 identification of the probiotic being tested, (5) confirm viability and quantity, (6) identify mechanisms  
173 underlying the beneficial effects, (7) conduct cost-effectiveness analyses,<sup>41,76</sup> and (8) are definitive  
174 multicentre RCTs.<sup>12,47,77</sup> Our proposed study, which builds on our promising pilot work, addresses all  
175 the limitations raised by the previous reviews and will provide the missing pieces of information.

176  
177 **1.5 HOW WILL THE RESULTS OF THIS TRIAL BE USED?** The generalizability of the proposed  
178 trial will be excellent. If probiotics are effective for specific pathogens, we will develop a knowledge  
179 translation (KT) plan to ensure integration into care occurs. We will encourage incorporation into  
180 clinical pathways and seek endorsement by knowledge user groups (e.g. Canadian Pediatric Society,  
181 Canadian Association of Emergency Physicians).<sup>78</sup> Successful dissemination strategies similar to those  
182 previously employed will be adopted.<sup>79-84</sup> This study, which has been endorsed by Pediatric Emergency  
183 Research Canada (PERC), a 2011 winner of the CIHR-CMAJ Top Achievements in Health Research  
184 Awards, will be conducted at 6 member sites. The network has recently been awarded funding by the  
185 Networks of Centres of Excellence Knowledge Mobilization program to build a 36 site network termed  
186 *TTranslating Emergency Knowledge for Kids*. The network's purpose is to optimize the transfer of  
187 knowledge into non-academic institutions..

188  
189 Dr. Finkelstein, editor of "KiDrug Alert Journal Club", Journal of Clinical Pharmacology and  
190 Population Therapeutics, will disseminate our findings to parents and professionals through this open  
191 access venue. Integrated methods will be employed to ensure the lessons learned at ProvLab and the  
192 Sherman Lab are rapidly disseminated through publications in peer-reviewed journals enabling others to  
193 replicate the process. Epidemiologic findings will be disseminated annually to share new knowledge of  
194 circulating pathogens. End-of-grant activities, as described above, will be performed focusing on  
195 infectious disease, microbiology, laboratory medicine and public health communities given our strong  
196 ties to Alberta Health the Public Health Agency of Canada. From a consumer perspective; our efforts  
197 would focus on enhancing the accuracy of labeling of the over-the-counter products, based on our  
198 results.

199  
200 **1.6 PLEASE DESCRIBE ANY RISKS TO THE SAFETY OF THE PARTICIPANTS**  
201 **INVOLVED IN THE TRIALS.** Well over 200 billion doses of probiotics have been consumed<sup>85</sup> and

no serious side effects have been reported in well people.<sup>12</sup> Five pediatric cases of lactobacillus bacteremia have been reported in which the strain was indistinguishable from the strain administered.<sup>86-88</sup> The cases include short gut syndrome (3), complex congenital heart disease (1), and cerebral palsy and sepsis (1). There have been no reports of adverse overdose events.<sup>16</sup> There is no evidence that probiotic use will worsen diarrhea, result in complications from the disease process, or introduce new toxicity. In our pilot, adverse events were only reported in the placebo group. Information on Lacidofil - testing, safety data, and research by Dr. Sherman's lab are available in Appendix 2 - Lacidofil.

## 2.0 THE PROPOSED TRIAL

**2.1 WHAT IS THE PROPOSED TRIAL DESIGN?** Randomized, placebo-controlled, double-blind, multicentre (6), Canadian, ED trial. All children aged 3 months to less than 48 months of age who present to a participating ED will be assessed for eligibility. A total of 886 children will be randomized to receive 5 days of a probiotic agent (Lacidofil –  $8 \times 10^9$  CFU/day) or placebo. The study will be conducted employing methodology suggested by the 2010 CONSORT statement.<sup>89,90</sup>

## 2.2 WHAT ARE THE PLANNED TRIAL INTERVENTIONS?

**ED Intervention:** The 1<sup>st</sup> dose will be administered in the ED. The sachet's contents will be sprinkled into 30 mL of a liquid (ideally ORS) which may be cool (0°C-25°C) but without ice crystal formation. Caregivers will receive instructions on study drug administration, completion of study forms, what and how much fluid to drink, criteria for seeing a health care practitioner or returning to the ED (Appendix 4), and standardized AGE discharge instructions from each hospital.

**Home Intervention:** All patients will take 1 sachet, based on randomization, every 12 hours for 5 days (total of 9 home doses). They will administer the medication at meal time, mixed with 30 mL of an unfrozen beverage with no ice crystal formations (above 0°C) and ingested immediately to optimize viability. Carbonated and highly acidic beverages should be avoided. We will stress the importance of administering all doses dispensed and the need to communicate with the study team on a daily basis until symptoms resolve. One extra dose/day will be provided (i.e. kits will contain 5 extra doses – total of 15 sachets to account for vomiting or wastage). The dose may be repeated once should the child vomit within 15 minutes of medication administration. Vomiting after medication administration rarely occurs > 1 time.<sup>79</sup> Oral fluid therapy will be encouraged according to established guidelines.<sup>14</sup> Children who are hospitalized will continue as per study protocol as we have successfully done previously.<sup>91</sup> Hospitalization at a non-study hospital site is very uncommon – 1/800 (0.1%) children in the PERC multicentre bronchiolitis RCT were admitted at an alternative site.<sup>91</sup> Should this occur, caregivers will have a letter describing the study, the care-plan, and the contact information of the Site Investigator.

**Rationale for Treatment Dose:** Although multi-strain products, such as Lacidofil, appear to show greater efficacy than single strains,<sup>92</sup> the optimal CFU/kg dose is unknown.<sup>93</sup> Lacidofil data indicates that a dose of  $3-6 \times 10^9$  CFU/day is effective.<sup>94</sup> Our pilot trial, which employed low ( $4 \times 10^9$  CFU/day) and high ( $8 \times 10^9$  CFU/day) dose arms, found no side effects with either dose. However, a positive association is postulated to exist between the probiotic dose and clinical benefits<sup>47</sup> with most positive studies employing doses  $\geq 6 \times 10^9$  CFU/day.<sup>44</sup> Thus, we will employ a dose of  $8 \times 10^9$  CFU/day. This should enable us to definitively answer our research question and hence influence future usage. The duration of therapy has been selected based on the best available evidence, the recommendations of experts in the field, previous studies, and the typical duration of most episodes of AGE.<sup>95</sup>

**Stool Sample Testing:** In keeping with usual common clinical practice, stool samples from all enrolled children will be sent for bacterial culture. Bulk specimens will be obtained whenever feasible. As was done in our pilot study, for children who do not provide a stool specimen prior to discharge, rectal swabs

252 (2 swabs) will be performed. One sample will be collected for bacterial culture according to site specific  
253 practices. The second sample will be collected using a flocked tipped sterile swab (FLOQSwabs™  
254 Flocked Swabs, Copan) and will be stored and frozen (-80°C) in Universal Transport Media (UTM;  
255 Copan). This approach allows us to obtain a specimen for molecular pathogen identification prior to  
256 discharge (i.e. prior to probiotic administration altering the accuracy of pathogen identification) on all  
257 study participants and will only be tested if an ED bulk stool is not obtained. Viral testing will be  
258 performed in batches. We will also attempt to collect a bulk stool sample from all RCT participants in  
259 the ED prior to discharge. This specimen is the preferred specimen for pathogen identification testing.  
260

261 Bulk Stool from Home (Pathogen Identification): Patients enrolled at all sites will be asked to provide  
262 additional bulk samples at home. Patients may decline, when obtaining informed consent, to collect bulk  
263 stool at home. The need to provide bulk stool samples will be stressed as these samples are required to  
264 perform pathogen-specific load quantification (i.e. cannot be performed on rectal swabs).

265 DAY #0: We will collect a bulk stool sample from all study participants who do not provide specimens  
266 in the ED prior to discharge.

267 DAY #5: We will collect a bulk stool sample from all study participants who provided a Day #0 bulk  
268 stool sample.

269 DAY #28: We will collect a Day #28 bulk stool sample from all study participants who consent to  
270 provide a Day #0 and #5 bulk stool sample. To collect specimens, caregivers will be provided with  
271 instructions (see Appendix 5) along with stool collection containers.  
272

273 Initial pathogen identification testing will employ the sample (either bulk stool or rectal swab) obtained  
274 in the ED to minimize the impact of probiotic administration on test results. The specimen will be tested  
275 using the Luminex xTAG GPP. Day #0 bulk stool specimens collected at home will only undergo  
276 pathogen identification testing if the ED rectal swab test does not identify a pathogen. This will ensure  
277 that negative rectal swab test results do not reflect inadequate sampling (i.e. rectal swab performed but  
278 insufficient stool obtained thereby yielding a false negative test). Day #5 and Day #28 specimens will  
279 only be tested if the Day #0 specimen identifies a pathogen. The pathogen identification data is required  
280 to assign an etiology to all study participants; this information will be employed to determine the  
281 pathogen-specific response across all study aims.  
282

283 Bulk Stool from Home (secretory IgA): In addition to pathogen identification and quantification, bulk  
284 specimens provided by participants on Days #0, #5, #28 will be sent to the Hospital for Sick Children  
285 (HSC) to the lab of Dr. Philip Sherman for sIgA testing (Appendix 6-sIgA Procedures). Samples will be  
286 stored at -80°C and will be sent to the Hospital for Sick Children (HSC) in bulk shipments from the labs  
287 of Dr. Linda Chui and Dr. Xiao-Li Pang. Fecal sIgA analysis will be performed by Dr. Sherman's  
288 laboratory which is certified to handle human specimens.<sup>96,97</sup>  
289

290 If a sample is unable to be provided at Enrolment, on Days 5 and 28, the first sample provided after  
291 Enrolment, the Day 5, and Day 28 time points respectively will be accepted.  
292

293 Patients/caregivers will receive a reminder telephone call or email correspondence, based on preferred  
294 method of follow up, one day prior to the scheduled sample return date (i.e. on Day 4 and Day 27).  
295

296 All specimens will be labeled with the date and time of collection and the subject's study identification  
297 number. Once a sample is obtained, caregivers will contact a contracted biomedical courier service who  
298 will transport the specimens to the enrolment site with shipment costs covered by study funds. Upon  
299 receipt at the laboratory, each sample will be frozen and split appropriately for future testing. This  
300 procedure is based on work by the Centers for Disease Control,<sup>143</sup> and our colleagues.<sup>144,145</sup>

301

302 Sites will batch ship all frozen stool samples to the Alberta Provincial Laboratory (ProvLab) and the lab  
303 of Dr. Xiao-li Pang in Edmonton, Alberta on a regular basis to enable interim laboratory analyses to  
304 verify collection and processing procedures. Regular shipments will minimize shipping costs and is  
305 acceptable given the stability of nucleic acid in frozen stool samples.<sup>146</sup> All the analyses will be  
306 conducted blinded to patient allocation.

307

308

309 **2.3 WHAT ARE THE PROPOSED PRACTICAL ARRANGEMENTS FOR ALLOCATING**  
310 **PARTICIPANTS TO TRIAL GROUPS? *Sequence Generation:*** The Women & Children’s Health  
311 Research Institute (WCHRI), based at the University of Alberta, will provide data management services  
312 for this study. Randomize.net (www.randomize.net), an internet based randomization service, will  
313 produce a randomization list stratified by study site, using random-number generating software. The lists  
314 will be sent to the central pharmacy (ACH) who will prepare consecutively numbered study kits  
315 according to the randomization schedule. These will be couriered to the clinical sites, using proper  
316 shipment containers and temperature monitors, where they will be stored in the Research Support  
317 Pharmacies. ***Allocation Concealment:*** Randomize.net uses industry standard security to send data over  
318 the internet. Randomization will be blocked using random blocks of 4 and 6 with a 1:1 allocation ratio.  
319 Stratifying by clinical site and blocked randomization will ensure that variations (e.g. site specific  
320 practice patterns, gastrointestinal pathogens) are comparably distributed across treatment arms. Only the  
321 research pharmacy at the coordinating centre and www.randomize.net will retain the randomization  
322 code. ***Implementation:*** Potentially eligible patients (i.e. all children with diarrhea who meet age criteria)  
323 will be identified by the triage nurses and will be screened by the Clinical Research Assistant or Nurse  
324 for eligibility. A log of all screened patients will be maintained. If eligible, the details of the study will  
325 be discussed with the caregivers of all eligible children by the Clinical Research Assistant or Nurse who  
326 will seek consent. If consent is obtained, enrolled children will consecutively be assigned a patient ID  
327 number by the clinical site. The Clinical Research Assistant or Nurse will collect baseline demographic  
328 clinical variables and will complete the data collection forms (Appendix 7-Study Subject Timeline)  
329 either on paper or directly into the secure online REDCap database via electronic tablet. Elements of  
330 clinical dehydration (Gorelick Score)<sup>98</sup> and baseline disease severity scores (Modified Vesikari Score)<sup>7</sup>  
331 will be assigned to enable baseline comparisons between treatment arms. The Clinical Research  
332 Assistant or Nurse will then log into randomize.net which will randomize the patient (i.e. it will provide  
333 a kit number that corresponds to a study drug kit at the clinical site which will be given to the patient).  
334 Following randomization the first dose will be administered (Section 2.2).

335

336 **2.4 WHAT ARE THE METHODS FOR PROTECTING AGAINST SOURCES OF BIAS?** Bias  
337 will be minimized by strictly adhering to the 2010 CONSORT Statement recommendations including  
338 the use of “third-party” assignment (Section 2.3).<sup>89</sup> Moreover, because the active ingredient constitutes <  
339 10% of the sachet, the probiotic and placebo powders will be identical in appearance, taste, texture and  
340 smell. Thus, participants, families, healthcare providers, data collectors (Research Assistants/Nurses),  
341 outcome adjudicators (Research Assistants/Nurses), and data analysts will be blinded, thereby  
342 preventing bias in outcome assessment. An intention-to-treat analysis will be performed to minimize  
343 bias associated with poor compliance and non-random loss of participants.<sup>99</sup> Co-interventions (e.g.  
344 antiemetic, intravenous rehydration, antibiotic administration) and other sources of confounding will be  
345 recorded. Reporting bias will be avoided by registering the trial at clinicaltrials.gov. Additionally our  
346 use of a published score as an outcome measure will protect against the introduction of bias in the  
347 assessment of treatment effects.<sup>100</sup>

348

349 **2.5 WHAT ARE THE PLANNED INCLUSION/EXCLUSION CRITERIA?** All patients with  
 350 gastroenteritis presenting to the ED of 6 participating hospitals will be eligible. The diagnosis of  
 351 gastroenteritis is at the discretion of the emergency department supervising physician and may or may  
 352 not include vomiting. Alternative terminologies that reflect as similar diagnosis are acceptable provided  
 353 they meet all other eligibility criteria. Examples include: viral illness, diarrhea, vomiting, upper  
 354 respiratory infection, post-infectious gastroenteritis, antibiotic associated diarrhea, toddlers diarrhea,  
 355 viral infection, enteritis, viremia, fever, and bronchiolitis.

356  
 357 Inclusion criteria (Patients must meet all of the following criteria to be eligible)

- 358 1. **Presence of diarrhea:** defined as  $\geq 3$  watery stools in a 24-hour period.<sup>101</sup>
- 359 2. **Duration of vomiting or diarrhea < 72 hours:** Early administration = greater efficacy.<sup>29,102,103</sup>
- 360 3. **Age 3 to < 48 months:** AGE severity and frequency are greatest amongst young children.<sup>104</sup>

361  
 362 Exclusion criteria (Patients who meet any one of the following criteria will not be eligible)

- 363 1. **Presence of an indwelling vascular access line or structural heart disease** (bacteremia risk).<sup>105</sup>
- 364 2. **Taking immunosuppressive therapy, or known history of immunodeficiency** (bacteremia risk).<sup>106</sup>
- 365 3. **Hematochezia in the preceding 72 hours, underlying significant chronic gastrointestinal problem**  
 366 **or inflammatory bowel disease:** Not including constipation, gastroesophageal reflux or chronic pain.
- 367 4. **Family member with an indwelling vascular access line, on immunosuppressive therapy, or with a**  
 368 **known immunodeficiency:** Does not include use of short course oral (<7 days) or inhaled steroids.
- 369 5. **Bilious vomitus:** May indicate a diagnosis other than AGE is possible.
- 370 6. **Probiotic use (supplement) in the preceding 2 weeks:** However, consumption of foods containing  
 371 probiotics will not result in exclusion as they are ubiquitous.
- 372 7. **Previously enrolled in this trial** (to ensure that the observations on trial patients are independent).
- 373 8. **Daily telephone follow-up will not be possible while symptomatic** (travel plans or language barrier).
- 374 9. **Allergy to soy:** Lacidofil, as well as the placebo product have come in contact with soy during the  
 375 manufacturing process.
- 376 10. **Pre-existing, or known, pancreatic dysfunction or insufficiency**<sup>107</sup>
- 377 11. **Oral or Gastrointestinal surgery within the preceding 7 days:** theoretical wound infection risk.

### 378 **Concomitant Medications**

379 The concomitant administration of antibiotics will be permitted and will be at the discretion of the  
 380 child's treating physician. Children taking antibiotics will *not* be excluded as probiotics remain effective  
 381 when given concomitantly with antibiotics<sup>108</sup> and their survival is not significantly altered. Similar  
 382 criteria will be applied to the administration of antipyretics, anti-emetics, and any other medications. As  
 383 per Standard of Care at the participating sites, Oral Rehydration Solution (ORS) will be provided during  
 384 the emergency department visit to enable the performance of oral rehydration therapy. In keeping with  
 385 institutional Standard of Care, patient/parent discharge instructions that will be provided, as specified in  
 386 protocol section 2.2, will encourage the ongoing use of appropriate ORS following discharge.  
 387  
 388

389 **2.6 WHAT IS THE PROPOSED DURATION OF TREATMENT PERIOD?** Five days.

390  
 391 **2.7 WHAT IS THE PROPOSED FREQUENCY AND DURATION OF FOLLOW-UP?** Daily  
 392 telephone or e-mail survey follow-up will occur, 7 days/week, **until both the diarrhea and vomiting**  
 393 **have resolved.** We will also conduct follow-up on days #5 and #14 even if symptoms have resolved.

394  
 395 **2.8 WHAT ARE THE PROPOSED PRIMARY AND SECONDARY OUTCOME MEASURES?**

396 **Primary Outcome (Clinical):** The primary outcome is the development of moderate-severe disease in  
 397 the 2 weeks after the index ED visit as measured by the MVS (Appendix 8-MVS).<sup>7</sup> The original 20  
 398 point Vesikari Score has been employed as a dichotomous variable in many clinical studies<sup>109-117</sup> despite

399 limited evidence supporting its use. However, it has been shown to correlate with other meaningful  
 400 measures such as caregiver anxiety, helplessness, and stress.<sup>118</sup> Recently, increasing severity scores were  
 401 associated with higher parental worry, greater changes in the child's behavior, and trends towards  
 402 greater impact on the parents' daily activities and higher parental distress.<sup>119</sup> ***So, why did we develop a***  
 403 ***Modified Score?:*** Percent dehydration, an element of the original score, is challenging to determine.  
 404 While using baseline and rehydrated weights is the gold standard,<sup>98</sup> this is often of limited value due to  
 405 difficulties in ensuring follow-up, determining when rehydration has occurred, and the variation related  
 406 to timing of voiding, stooling, eating, and drinking. Moreover, clinical estimates of dehydration are  
 407 extremely inaccurate.<sup>120</sup> Thus, this element is omitted or incorrectly assigned in most studies. The  
 408 modified score which we have created includes an important and easy to obtain outcome that reflects  
 409 global disease severity-***need for unscheduled future health care visits within 2 weeks of the index***  
 410 ***visit.***<sup>7</sup> This is supported by evidence that the utilization of professional medical care correlates with  
 411 disease severity.<sup>118</sup> **Unscheduled future health care visits** is a powerful marker that has the capacity to  
 412 alter clinical practice and influence decision makers. Similar modifications have been performed  
 413 previously when percent dehydration has been unavailable<sup>118,121</sup> and we have previously shown that  
 414 because ED care does not alter the disease process in AGE, ED revisits are very common (publication  
 415 attached).<sup>79,122</sup> **The MVS<sup>7</sup> is presented** below (Table 1), with the score structure (0, 1, 2, 3 points)  
 416 unaltered from the original score.  
 417

**Table 1. Modified Vesikari Scale Score**

| Points                                  | 0          | 1              | 2               | 3               |
|-----------------------------------------|------------|----------------|-----------------|-----------------|
| Diarrhea Duration (d)                   | 0          | 1-96 hours     | 97-120 hours    | ≥ 121 hours     |
| Max # of diarrheal stools/24 hr period  | 0          | 1-3            | 4-5             | ≥ 6             |
| Vomiting Duration (d)                   | 0          | 1-24 hours     | 25-48 hours     | ≥ 49 hours      |
| Max # of vomiting episodes/24 hr period | 0          | 1              | 2-4             | ≥ 5             |
| Max Recorded Fever                      | < 37.0°C R | 37.1-38.4 °C R | 38.5-38.9°C R   | ≥ 39.0°C R      |
| Unscheduled Future Health Care Visit    | 0%         | -              | Primary Care    | Emergency Dept. |
| Treatment Administered                  | None       | Rehydration    | Hospitalization | -               |

418 ***Characteristics of the MVS:*** We prospectively evaluated the MVS in an 11 centre (455 children) ED  
 419 study<sup>7</sup> in children meeting eligibility criteria as planned for the current proposal (≥3 stools in a 24 hour  
 420 period and <72 hours of symptoms) which found that it effectively measures global disease severity.  
 421 Factor analysis revealed that item correlations were acceptable and supported the appropriateness of  
 422 retaining all factors. Multi-collinearity was not a problem and the correlations between the MVS and  
 423 other measures of clinical significance were in the expected direction. Disease severity was associated  
 424 with prolonged daycare (P = 0.01) and work (P = 0.002) absenteeism. The MVS had a normal  
 425 distribution with minimal kurtosis (-0.14; SE: 0.24) and skewing (0.39; SE: 0.12). There was good  
 426 variation across severity ranges (49% mild; 21% moderate; 30% severe). Variation between institutions  
 427 was insignificant (P = 0.11) and complete follow-up was achieved in 91% of participants.

429 ***How will it be Calculated?:*** Following enrollment (Time 0), follow-up will occur daily until both the  
 430 diarrhea and vomiting have resolved (Section 2.7). Once follow-up is complete (Day #14) each variable  
 431 is assigned a score for the entire study period (Time 0 to Day #14); each patient gets a single total score  
 432 for the study. Variables are scored based on the worst 24 hour period (e.g. maximal number of episodes  
 433 of vomiting in a 24 hour period) or on the total duration of symptoms (e.g. number of days of vomiting)  
 434 or are based on the occurrence of an outcome (e.g. hospitalization).

435 ***What if at baseline the pre-enrollment MVS is ≥ 9?:*** Regardless of the score assigned at Time 0 (i.e.  
 436 *pre-enrollment score*), EVERYONE reverts to a score of 0 at enrollment (i.e. the study evaluates the

437 impact on the disease process going forward). The *pre-enrollment score*, which is based on symptoms in  
438 the 72 hours prior to presentation, will serve as a covariate in a secondary analysis of the primary  
439 outcome and will be employed for sub-analysis purposes. An example is provided (Appendix 8-MVS).  
440 **The primary outcome** (*the presence of moderate-severe disease, as defined by a MVS of  $\geq 9$  during the*  
441 *2 week follow-up period*) **will ONLY include symptoms and outcomes that occur following the ED**  
442 **visit (i.e. after randomization) and will not be directly impacted by the pre-enrollment score.**  
443 **Why a cut-point of 9?:** With the original score, severe disease was defined as  $\geq 11$ ;<sup>109,110,115,116,123-125</sup>  
444 moderate as  $\geq 9$ .<sup>126</sup> In our derivation study,<sup>7</sup> construct validity was proven by using scores of  $\geq 9$  to  
445 define moderate and  $\geq 11$  to define severe disease. These cut-points were associated with significant  
446 increases in other measures of disease severity [e.g. daycare (P=0.01) and work absenteeism (P=0.002)].<sup>7</sup>  
447

#### 448 **Secondary Outcomes (Clinical):**

- 449 1. **The duration of diarrhea:** Time from treatment initiation until the appearance of the last watery  
450 stool<sup>127-129</sup> as reported during daily phone conversations.
- 451 2. **The duration of vomiting:** Limited data indicate that probiotic administration may reduce  
452 vomiting.<sup>102,130</sup> Recovery will be evaluated in children who vomit  $\geq 3$  times over the 24 hours prior  
453 to the ED visit and defined as “time from treatment initiation until last vomiting episode.” We have  
454 previously reported that vomiting frequency predicts outcomes in AGE.<sup>131</sup>
- 455 3. **Return visits for unscheduled care to a health care provider related to vomiting, diarrhea,**  
456 **dehydration, fever, or fluid refusal, within two weeks:** Not included will be scheduled visits (e.g.  
457 re-assessment, vaccinations). This outcome is important as  $> 50\%$  of children have a follow-up  
458 office visit,<sup>43</sup> 8-18% require an ED visit,<sup>132</sup> and 5-8% are hospitalized.<sup>43</sup>  
459

460 ***Additional Outcomes:*** Work and daycare absenteeism.

461  
462 **Side Effect Profile:** *To determine if short course probiotic administration to young children with*  
463 *AGE is associated with an increase in minor side effects.* As stated by the NIH, probiotic safety needs  
464 to be studied scientifically.<sup>133</sup> Groups will be compared regarding the development of any side effects  
465 with particular attention paid to bloating, abdominal distention, duration of fever, and buttock rash. The  
466 importance of evaluating side effects has been highlighted by a recent adult pancreatitis study which  
467 found an unexpected increase in mortality in probiotic treated patients.<sup>107</sup>  
468

469 **Mechanism of Action:** *To determine if probiotic administration increases fecal secretory IgA levels in*  
470 *children with AGE (Appendix 6).* The first stool sample produced following enrollment will be  
471 collected along with samples on days 5 and 28. sIgA is a key element in the gastrointestinal immune  
472 defense as it agglutinates microorganisms and prevents pathogen adherence to mucosal surfaces.<sup>134-137</sup>  
473 Evaluating sIgA in children with AGE has been identified as a needed element to advance this field of  
474 research.<sup>138,139</sup> Animal studies have reported a substantial increase in anaerobic bacteria in the absence  
475 of normal sIgA and that normalization of sIgA production results returns intestinal microbiota to its  
476 regular composition.<sup>140</sup> Probiotics are believed to enhance host immunity by regulating inflammatory  
477 cytokines<sup>141</sup> and by increasing sIgA production.<sup>142,143</sup> In human studies, probiotic administration appears  
478 to increase fecal sIgA concentration in healthy adults,<sup>144</sup> children,<sup>145</sup> infants,<sup>146,147</sup> and pre-term  
479 infants.<sup>148</sup> However, correlation with clinical outcomes has not yet been evaluated. We will determine if  
480 fecal sIgA levels are greater amongst children treated with a probiotic agent compared with placebo.  
481 Levels will be correlated with clinical findings. However, **experiments correlating probiotic**  
482 **administration, clinical outcomes, and fecal sIgA levels in the context of enteric infection have not**  
483 **been conducted.** Specifically, we will determine, at a pathogen-specific level, if fecal sIgA levels are  
484 higher in children treated with a probiotic agent compared with placebo, and if higher fecal sIgA levels  
485 are associated with improved clinical outcomes.  
486

487 **Pathogen Load Quantification:** *To determine if a 5-day probiotic treatment course administered to*  
488 *children with AGE results in pathogen-specific reductions in stool pathogen load.* Our team, which  
489 includes experts in molecular diagnostics, virology and bacteriology, has the capacity to quantify the  
490 impact of probiotic administration on stool pathogen infectious loads. These measures represent disease  
491 severity in individuals with AGE;<sup>149-153</sup> higher stool loads are associated with more severe symptoms,  
492 prolonged shedding,<sup>150,151,153,154</sup> hospitalization,<sup>155</sup> and the presence of virus in the blood (i.e.  
493 viremia).<sup>155,156</sup> In children with AGE, stool viral loads correlate ( $r = 0.80, P < 0.001$ ) with the Vesikari  
494 Score.<sup>157</sup> Bacterial loads, analyzed from other biological specimens, also have clinical relevance – for  
495 example, sputum *Pseudomonas aeruginosa* loads correlate with clinical status<sup>158</sup> and those of *Neisseria*  
496 *meningitidis* in serum are associated with death and permanent sequelae.<sup>159</sup> All of this work builds on  
497 the model of human immunodeficiency disease, where serum viral load has been a key prognostic  
498 marker for decades.<sup>160</sup> Consequently, stool infectious load quantification is increasingly encouraged.<sup>161</sup>  
499 Our team, which has led many key advances in molecular virology<sup>162-167</sup>, has developed a standardized  
500 approach (see Section 2.9.2) to quantify **stool viral and bacterial loads, enabling us to quantify an**  
501 **objective marker of disease severity.**

502

## 503 **2.9 HOW WILL THE STUDY AIMS AND OUTCOMES BE ACHIEVED?**

### 504 **2.9.1 Aim #1: Clinical Benefits – Modified Vesikari Scale Score**

505 The Modified Vesikari Scale score will be assigned based on data collected during the follow-up period  
506 via electronic survey or phone call. A single score is assigned to each of the 7 elements representing  
507 either symptom duration, the maximal frequency of vomiting, maximal frequency of diarrhea, maximal  
508 recorded body temperature, and subsequent healthcare use and treatments provided. Each participant  
509 will have a single, Modified Vesikari Scale score assigned at the conclusion of the follow-up period  
510 which reflects the severity of the child's disease. The relationship between the assigned score, the  
511 identified pathogen, and probiotic exposure (active/placebo) will be quantified.

512

### 513 **2.9.2 Aim #2: Microbiologic – Stool Pathogen-Specific Load**

514 All children with a Day #0 viral or bacterial pathogen identified *and* who provided bulk stool specimens  
515 on Days #0, #5, and Day #28 will have samples tested for pathogen-specific load quantification. Results  
516 will be reported as NA copies of pathogen/gm and the difference between Days #0 and SUBSEQUENT  
517 TEST DAYS will represent the participant's pathogen-specific load reduction. The relationships  
518 between pathogen-specific load reduction, infecting pathogen, and probiotic exposure (active/placebo)  
519 will be quantified. In addition, to enhance the clinical interpretation of pathogen load reduction, we will  
520 explore the relationship between Modified Vesikari Score and pathogen load reduction separately.

521

522 Quantification procedures will be standardized to ensure that the homogeneity and proportion of stool  
523 included in each analysis is consistent between samples (intra- and inter-patient) and hence per reporting  
524 unit (gm). To achieve this degree of standardization, a 20% (weight/volume) suspension of stool  
525 specimen will be prepared with phosphate-buffered saline (PBS) and clarified by centrifugation.  
526 Standardization will be facilitated by conducting batch analyses including Days #0 and #5, and Day #28  
527 specimens from each participant in the same run, thereby eliminating inter-run variation.

528

529 ***Quantification of enteric viruses:*** This will be performed as previously described by our team (Pang,  
530 Lee).<sup>166</sup> In brief, samples will be thawed, mixed by vortexing and a 20% stool specimen suspension will  
531 be prepared and clarified by centrifugation. Total NA will then be extracted and eluted using the  
532 NucliSENS<sup>®</sup> easyMAG<sup>®</sup> automated system (bioMerieux, Durham). Viral NA prepared from non-study  
533 stool samples testing positive for well-characterized enteric viruses (i.e. rotavirus, norovirus GI/GII, and  
534 adenovirus 40/41) will be used as positive controls. The primers and probes for the detection of  
535 norovirus, rotavirus, and adenovirus<sup>164,168-171</sup> will be labeled with Fam detector and Tamara quencher  
536 dyes (Applied Biosystems). Individual real-time PCR reactions for each virus will be performed. After

537 incubation for denaturing, PCR amplification will be performed and profiles will be collected and  
538 analyzed using Sequence Detection Software version 1.0. To quantify the 3 viruses, an external standard  
539 curve will be established using 10-fold dilutions from 1 copy to  $1.0 \times 10^8$  copies.  
540

541 **Quantification of enteric bacteria:** Building on our prior work and collaborating with team members  
542 (Pang, Lee), we will employ methodology as described above for the viral targets, to quantify bacterial  
543 loads. This will be determined for stool samples positive for each bacteria using singleplex real-time  
544 PCR assays for each respective bacteria (*Salmonella*, *Campylobacter*, *Shigella*, *E. coli*, *Yersinia*).  
545 Standard curves correlating CFU and crossing point of the real-time PCR assay for each organism will  
546 be created by performing real-time PCR on 10-fold dilutions of standardized bacterial suspensions that  
547 will also be plated onto sheep blood agar plate to determine the CFU count.  
548

### 549 **2.9.3 Aim #3: Immune Response – Fecal Secretory Immunoglobulin A (sIgA) Quantification**

550 sIgA testing will be performed employing the Eagle Biosciences Secretory IgA ELISA kits (catalog #:  
551 SGA35-K01) in accordance with the manufacturers instructions.  
552

## 553 **2.10 HOW WILL THE OUTCOME MEASURES BE MEASURED AT FOLLOW-UP?** All

554 caregivers will receive discharge instructions that will include information on tasks required following  
555 discharge. Training materials have been developed based on the 3 site probiotic pilot study.  
556

557 **1. Daily Telephone/Survey Communication:** At the index visit, caregivers will be asked their preferred  
558 method of communication – electronic (i.e. email survey) versus telephone. Surveys (telephone and  
559 email) will be offered in French and English for sites requiring bilingual data collection. Following  
560 discharge, site Clinical Research Assistants or Nurses will contact the family daily until both the  
561 diarrhea and vomiting have resolved employing the identified method. A standardized script or  
562 survey/data collection form will be employed. If phone is opted for, the caller will enquire about  
563 ongoing symptoms, medical evaluations, treatments, child care and work absenteeism, and side effects.  
564 Detailed questioning will follow positive responses. The survey will employ advanced logic to enhance  
565 ease of use. If the caregiver does not complete the survey within 48 hours, a telephone follow-up will be  
566 performed. **Compliance** will be assessed on day #5 and final data points will be collected on day #14.  
567 Protocols will be developed to deal with caregiver questions in accordance with institutional  
568 requirements. To maximize validity, caregivers will be reminded of the importance and method of  
569 administering the probiotic/placebo. Similar schemes have been successfully implemented by the  
570 principal investigator,<sup>79,122</sup> other PERC multicentre studies,<sup>82,91</sup> and was employed in the pilot. Caregiver  
571 report (telephone/survey) will serve as the primary source document.  
572

573 **2. Chart Review:** We will verify data regarding revisits, intravenous hydration, hospitalization, and  
574 microbiology testing using each centre's medical record database.  
575

576 **3. Database Reviews:** Provincial databases (e.g. National Ambulatory Care Reporting System; Alberta  
577 Ambulatory Care Classification System; Alberta Health Care Insurance Plan) and Canadian Institute for  
578 Health Information databases will be employed to verify future health care provider use.  
579

580 **2.11 WILL HEALTH SERVICE RESEARCH ISSUES BE ADDRESSED?** As called for by the  
581 2010 Cochrane review,<sup>12</sup> an economic evaluation will be conducted by Dr. Willan and Mr. Goeree<sup>172-</sup>  
582 <sup>177</sup> alongside the clinical trial (Appendix 9-Economic Analysis Plan). We will monitor work absenteeism,  
583 as this is the major item contributing to cost.<sup>122</sup> Moreover, days of diarrhea has been found to correlate  
584 with work absenteeism,<sup>178</sup> and a recent pediatric, Canadian ED study found that > 50% of the societal  
585 costs occur in the 15 days following the ED visit.<sup>179</sup> Hence, if effective, cost savings are likely from a  
586 societal perspective due to the inexpensive nature of probiotics and the economic benefit derived from

587 reduced work absenteeism. Because adding a therapeutic intervention may add to overall health care  
588 costs, willingness to pay will be determined. The incremental cost effectiveness will be determined by  
589 assessing resources and costs associated with the treatment of AGE for children who receive the current  
590 standard of care compared to those who receive a probiotic.

591

## 592 **2.12 WHAT IS THE PROPOSED SAMPLE SIZE AND WHAT IS THE JUSTIFICATION FOR** 593 **THE ASSUMPTIONS UNDERLYING THE POWER CALCULATIONS (APPENDIX 10)?**

594 **Clinical Outcome:** The sample size is based on the assessment of the between-group difference in  
595 proportions of children with a *post-randomization* score  $\geq 9$  on the MVS. **This is a superiority study** in  
596 which the adoption of probiotic use can be recommended if the rate of the primary outcome is  
597 significantly lower amongst those who receive the probiotic medication. Calculations are based on a  
598 **two-sided type I error ( $\alpha$ ) of 0.05 and power ( $1-\beta$ ) of 0.90.** The null hypothesis is  $H_0: P_c - P_I = 0$ ,  
599 where  $P_I$  and  $P_C$  are the event rates in the intervention and control groups respectively. The alternative  
600 hypothesis is  $H_A: |P_I - P_C| > 0.10$  (i.e. the event rates will differ by at least 10 percentage points).

601 **Minimal Clinically Important Difference (MCID):** Ten content experts from the US and Canada were  
602 surveyed regarding the MCID. Absolute risk differences ranging from 7.5-15% were suggested. We  
603 chose a conservative estimate of 10% for the primary outcome (number needed to treat of 10).

604 **Outcome in Control Group:** Our estimate for the development of moderate to severe AGE in the  
605 controls is based on data collected as part of our 2009 evaluation of the MVS in 455 children aged 3 –  
606 48 months, with < 72 hours of symptoms, who presented to one of 11 Canadian EDs (Section 2.8).<sup>7</sup>  
607 Using the ED visit as time 0, 25% of eligible children had scores consistent with moderate to severe  
608 disease following discharge. This is lower than previous reports of ED<sup>110,125</sup> and community  
609 populations<sup>109,124,126</sup> because we did not include symptoms that existed prior to the visit. However, Dr.  
610 Schnadower's group in the United States has just completed data collection on 282 children enrolled at 6  
611 sites in the United States and they found that 24% of children in their sample had scores consistent with  
612 moderate to severe disease following discharge (personnel communication September 6, 2012). Since  
613 our study population and method of MVS calculation in the derivation and recent validation studies and  
614 the current proposal are the same, 25% is a very accurate estimate. Given the above, the required sample  
615 size to compare proportions between two different groups is 670.<sup>180</sup>

616 **Sample Size Adjustment Calculation:** Based on previous work by our group with similar follow-up  
617 designs<sup>79,91,181</sup> and extensive reviewer feedback, we have assumed a 10% loss to follow-up  
618 ( $670/0.9=744$ ), 5% drop out ( $744/(0.95)^2=825$ ), and 2.5% drop in (caregivers who decide to buy a  
619 probiotic agent at a pharmacy to administer to their child) rate ( $825/(0.975)^2=868$ ). Adjustment for  
620 O'Brien-Fleming monitoring boundaries requires a further 2% increase. Thus, **the total number**  
621 **randomized (final sample size) will be 886.**

622

623 **Side Effect Profile:** To date, clinical trials employing probiotics have not attributed any adverse events  
624 to probiotic administration.<sup>12</sup> We suspect that minor side effects have not been documented; however,  
625 clinicians need to have an understanding of the side effect profile in order to enable caregivers to make  
626 an informed treatment decision. Given our sample size, a significant difference between groups will be  
627 easily detected (i.e. 80% power to detect an increase in reported adverse events from 5% to 10%).  
628

629 **Mechanism of Action:** A study evaluating the impact of formula supplementation with oligosaccharides  
630 found fecal sIgA values of 729 and 377  $\mu\text{g/g}$  in the intervention and control groups respectively.<sup>182</sup> If we  
631 assume a clinically significant difference of 300  $\mu\text{g/g}$ , a standard deviation of 500  $\mu\text{g/g}$ , 80% power and  
632 a type I error of 0.05, the required sample size is 45 subjects/group. Thus we will aim to include a  
633 minimum of 100 patients which will be recruited from all study sites, with the exception of the IWK  
634 Health Centre.

635

636 **Pathogen-Specific-Effectiveness Study** (Table 2): Home Stool Collection on Days #0 and #5 will be  
 637 completed at all 6 study sites. It is anticipated that bulk stool will be collected on 25% of children in the  
 638 ED and 75% of those requiring home Day #0 collection. Of those providing an ED/home Day #0  
 639 specimen, 75% will provide a Day #5 sample.<sup>183,184</sup> We will collect specimens to enable pathogen  
 640 identification on all study subjects (n=886). These will be paired with Modified Vesikari Scale score  
 641 data from the estimated 797 children (90%) who will complete follow-up. Data from these 797 children  
 642 will support the conduct of Aim #1 analyses. Assuming ~50% viral (n=399), ~40% unidentified  
 643 (n=318), and ~10% bacterial (n=80), and trusting randomization (~50% probiotics, ~50% placebo) we  
 644 anticipate a minimum of 40 children per arm in our smallest group. Day #0 and 5 paired samples will be  
 645 obtained from ~465 children of which ~232 will be positive for a virus and ~46 for a bacteria. Thus,  
 646 pathogen load reduction calculations will be performed for 278 participants. These accrual estimates are  
 647 summarized in a diagram in **Appendix 12**.  
 648

**Table 2. Current and Anticipated Enrollment and Specimens per Study Aim**

|        | Required                                                                                                                     | Bridge Funding |                 | Pathogen-Specific-Effectiveness Study |                         |                         | Total |
|--------|------------------------------------------------------------------------------------------------------------------------------|----------------|-----------------|---------------------------------------|-------------------------|-------------------------|-------|
|        |                                                                                                                              | Collected      | To be Collected | 10/2014<br>–<br>09/2015               | 10/2015<br>–<br>09/2016 | 10/2016<br>–<br>09/2017 |       |
| Aim #1 | <ul style="list-style-type: none"> <li>• Modified Vesikari Scale score</li> <li>• ED stool sample or rectal swab</li> </ul>  | 77<br>(actual) | 120             | 200                                   | 200                     | 200                     | 797   |
| Aim #2 | <ul style="list-style-type: none"> <li>• Days #0 and #5 stool samples</li> <li>• Positive pathogen identification</li> </ul> | 14             | 43              | 74                                    | 74                      | 73                      | 278   |
| Aim #3 | <ul style="list-style-type: none"> <li>• Days #0 and 5 stool samples</li> </ul>                                              | 24<br>(actual) | 72              | 123                                   | 123                     | 123                     | 465   |

649

### 2.13 WHAT IS THE PLANNED RECRUITMENT RATE (APPENDIX 11)?

650 The 5 original proposed study sites saw 10,344 children aged 3 – 48 months with AGE in 2011 (a 17%  
 651 increase since 2009). During our pilot RCT, 2.1% of children with AGE aged 0-4 years were enrolled.  
 652 Based on the published literature and our data: (i) presenting November 1 – May 31 between 8:00 –  
 653 24:00 (55%), (ii) meet definition of diarrhea (50%), (iii) < 72 hours of symptoms (45%), (iv) absence of  
 654 exclusion criteria (80%), and (v) provide consent (50%), our best estimate is that 4.7% of children with  
 655 AGE aged 3 - 48 months will be enrolled. The difference between our pilot and the best point estimate is  
 656 due to the requirement of daycare attendance in our pilot study. Based on our experience with AGE,<sup>79,185</sup>  
 657 and multicentre trials,<sup>82,186</sup> we believe that we should employ our worst case scenario recruitment  
 658 estimate (3.1%) which will enable us to enroll our full sample size over three AGE seasons. The only  
 659 prior North American ED study, which employed similar eligibility criteria, recruited 129 subjects at 1  
 660 site in just 8 months<sup>51</sup> therefore we believe our recruitment plan is realistic. The data outlined in  
 661 Appendix 11 is for the initial 5 sites. A sixth study site has been added to improve enrolment and  
 662 projected timelines. Data related to gastroenteritis visits is unavailable for the sixth study site.  
 663  
 664

665

### 2.14 ARE THERE LIKELY TO BE ANY PROBLEMS WITH COMPLIANCE?

666 While infrequently reported and not considered to be problematic,<sup>187</sup> non-compliance is unlikely related  
667 to probiotic side effects.<sup>12</sup> Participant withdrawal has primarily been related to the primary illness.<sup>12</sup> A  
668 recent study reported 108% compliance due to medication re-administration in subjects who vomited.<sup>188</sup>  
669 As the intervention is of a short duration, the burden to caregivers is minimal. In our pilot, compliance  
670 was 91% as reported by caregivers and verified by return sachet counts. This does not reflect the impact  
671 of vomiting following medication administration. A recent ED probiotic study reported that 87% of  
672 caregivers found the probiotic and placebo powders to be “very” or “somewhat” easy to administer.<sup>51</sup>  
673 Hence, we do not anticipate compliance problems; nonetheless, we will track compliance by obtaining  
674 unused sachet counts (day #5) and requesting their return (day #14).  
675

## 676 2.15 WHAT IS THE LIKELY RATE OF LOSS TO FOLLOW-UP?

677 Our previous ED pediatric AGE research achieved telephone follow-up rates of 98-99% on Day #3 and  
678 96-99% on day #7.<sup>79,122</sup> Similar success has been documented in prior PERC (99%)<sup>82,91</sup> multicentre  
679 studies. We will err on the conservative side and estimate a 10% loss to follow-up. If daily contact does  
680 not occur we will collect data from missed days on subsequent days when caregivers are contacted. The  
681 use of databases (Section 2.10) will supplement the daily telephone calls.  
682

## 683 2.16 HOW MANY CENTRES WILL BE INVOLVED?

684 Six EDs that are members of PERC, a network which has extensive experience conducting large scale  
685 clinical studies,<sup>4,82,91,147,189-191</sup> will participate – Alberta Children’s Hospital (Calgary), Hospital for Sick  
686 Children (Toronto), Children’s Hospital of Eastern Ontario (Ottawa), Centre Hospitalier Sainte-Justine  
687 (Montreal), IWK Health Centre (Halifax), and the London Children’s Hospital (London).  
688

## 689 2.17 WHAT IS THE PROPOSED TYPE OF ANALYSES?

690 **All analyses will be undertaken by the intention to treat principle.** Adverse events will use the “as  
691 treated” principle. Patients who drop out or crossover will be followed and included. All statistical tests  
692 of hypotheses will be two-sided. Baseline characteristics will be compared between groups using  
693 frequency counts and percentages for discrete variables, and means, medians, standard deviations, and  
694 interquartile ranges for continuous variables. Baseline characteristics will be analyzed to determine if  
695 there is a need to adjust for differences between groups. Sensitivity analyses will be performed to assess  
696 the possibility and consequences of losses to follow-up not occurring at random, as well as to assess the  
697 classification of children who have multiple pathogens identified (<5%). Initial classification will be  
698 based on Day #0 load (i.e. classified based on higher load); re-classification will evaluate the impact of  
699 classification according to the agent with the lower pathogen load.  
700

701 **Clinical-Primary Outcome:** The proportion of children with moderate to severe disease (i.e. MVS  $\geq$  9)  
702 will be analyzed by comparing proportions utilizing a Mantel-Haenszel test, stratified by clinical centre.  
703 **Significance for the primary outcome measure will be determined using a two-sided 0.05 level.** The  
704 *pre-enrollment* MVS will not be included in the primary analysis as we do not anticipate the baseline  
705 and post-intervention scores to be correlated. Secondary analyses of the primary outcome will employ  
706 logistic regression methods to adjust for covariates that may be imbalanced between groups (e.g. age,  
707 *pre-enrollment* MVS, severity of baseline diarrhea and vomiting, hydration assessment, need for  
708 hospitalization at index visit). We will also analyze the MVS as a continuous variable through a  
709 stratified Wilcoxon rank-sum test. The mean benefit will be explored, separately, in relation to:

710 **1. Pathogen-group:** virus vs. bacteria vs. not identified

711 **2. Viral agent:** rotavirus vs. norovirus vs. adenovirus

712 **3. Bacterial agent:** *Campylobacter* vs. *Salmonella* (only ones anticipated to have sufficient numbers)

713 All analyses will first employ 2-way ANOVA to assess main effects and interactions of treatment  
714 assignment and pathogen group. To assess for other covariates and potential confounders, multivariable

715 regression models including treatment, pathogen and other key covariates (e.g. age, sex, Modified  
716 Vesikari Scale score at enrollment, hospitalization, antibiotic use) will be constructed.  
717

718 **Clinical-Secondary & Tertiary Outcomes:** The overall significance level for statistical tests on the  
719 **secondary outcomes** will be set at 0.05. Holm's method will be used to adjust for multiple comparisons.  
720 The continuous variables of (1) duration of diarrhea and (2) vomiting will be measured in hours and  
721 analyzed with a Van Elteren test, stratified by clinical centre. (3) Unscheduled health care visits will be  
722 analyzed using a Mantel-Haenszel test, stratified by clinical centre. The **tertiary outcomes** of (4)  
723 number of days the child is absent from daycare and the (5) caregiver is absent from work will be  
724 analyzed using an appropriate model with robust estimates for standard errors. Dichotomous outcomes  
725 to be evaluated but unlikely to achieve significance include ED revisits, intravenous rehydration, and  
726 hospitalization. Additional analyses involving these outcomes will include linear and logistic regression  
727 models that adjust for possible effects of baseline characteristics.  
728

729 **Side Effect Profile:** The proportions of children experiencing any **side effect**, as reported by the  
730 caregivers, will be compared between groups using the Mantel-Haenszel test, stratified by site. The  
731 analysis will evaluate the presence/absence of side effects, as an aggregate outcome variable.  
732

733 **Mechanism-Fecal Secretory IgA:** To test for a difference in **fecal secretory IgA** the Wilcoxon rank-  
734 sum test will be performed. As this is a mechanistic outcome and the motivation of its study is distinct  
735 from other outcomes, the test will be performed at the 0.05 level. Data will be analyzed to determine if  
736 fecal secretory IgA levels 5 days and 4 weeks after initiation of treatment are higher amongst children  
737 treated with probiotic than those treated with placebo. Fecal sIgA data will also be analyzed by outcome,  
738 comparing levels amongst those with mild disease to those with moderate-severe disease.  
739

740 **Pathogen Load Quantification:** To determine if a 5-day probiotic treatment course administered to  
741 children with AGE results in **pathogen-specific reductions in stool pathogen load**. Benefit is defined  
742 as the difference in stool pathogen load between Days #0, #5, and #28. The analysis will employ a 2-  
743 way ANOVA followed by multivariable linear regression models adjusted for pathogen, interaction and  
744 important covariates (e.g. age, sex, baseline Modified Vesikari Scale score, baseline pathogen load,  
745 antibiotic use, increase in fecal sIgA). The analysis will determine if reduction in pathogen-specific load  
746 is independently related to treatment and pathogen. Based on the distribution of the reduction in  
747 pathogen-specific loads, the mean or median reductions will be explored in relation to pathogen,  
748 comparing:

749 **1. Pathogen-group:** virus vs. bacteria

750 **2. Viral agent:** rotavirus vs. norovirus vs. adenovirus

751 **3. Bacterial agent:** *Campylobacter* vs. *Salmonella* (only ones anticipated to have sufficient numbers)  
752

753 Since there is the potential that clinical response, pathogen load reduction, and fecal sIgA are related  
754 outcomes, we will explore the overall simultaneous change in the means of the outcomes due to  
755 treatment arm by performing a Hotelling's t-test on the three response vectors (i.e. differences in  
756 Modified Vesikari Scale score, and the Days #0 and 5 and Days #0 and 28 changes in infectious load  
757 and fecal sIgA).  
758

## 759 **2.18 WHAT IS THE PROPOSED FREQUENCY OF ANALYSES?**

760 The **Data Safety Monitoring Committee (DSMC)** will meet after 200 and 500 patients to review  
761 enrollment, study procedures, form completion, data quality, loss to follow-up, drop-in rate, and interim  
762 safety and efficacy results. The analyses will test the hypothesis that the probability of developing  
763 moderate to severe AGE in the probiotic arm is equal to that in the placebo arm. Conservative O'Brien-  
764 Fleming monitoring boundaries, implemented using the Lan-DeMets alpha-spending function approach,

765 will be used as guidelines for early stopping for safety or efficacy. Based on trends and adverse events,  
766 the DSMC may decide to meet sooner than planned using boundaries adjusted accordingly. Because this  
767 trial involves children under the age of 6 months, the DSMC has approved a plan to complete an interim  
768 safety analysis on the first 20 subjects enrolled under 6 months of age. All serious adverse events will be  
769 reported within 24 hours to the DSMC and based on these reports; the DSMC may decide to conduct a  
770 safety analysis before the full 20 subjects have been enrolled in this age group. Otherwise, a blinded  
771 analysis will be conducted after the 20 subjects < 6 months of age have been enrolled. This data will be  
772 unblinded if the DSMC deems it necessary to conduct an unblinded interim safety analysis. The results  
773 of this analysis will be communicated to the NNHPD branch of Health Canada at the discretion of the  
774 DSMC chair should any concerns be identified.

775  
776 **2.19 ARE THERE ANY PLANNED SUBGROUP ANALYSES?** (1) The presence of a MVS  $\geq 9$  will  
777 be analyzed by (i) age < 1 year, (ii) breast-feeding status, (iii) antibiotic usage and (iv) protocol  
778 compliance. (2) Duration of vomiting will be analyzed only in those patients who have  $\geq 3$  episodes of  
779 vomiting in the 24 hours prior to enrollment. (3) Daycare and work absenteeism will only be analyzed  
780 for children who attend daycare and caregivers who work. A subgroup analysis will be performed for  
781 children with (4) rotavirus infection by adding an interaction term between treatment and rotavirus  
782 positivity in a logistic regression model. The independent variables in the model will be (i) treatment  
783 group, (ii) rotavirus positivity (yes/no) and (iii) the interaction between treatment group and rotavirus  
784 positivity. Universal rotavirus vaccination does not exist in Canada with the decision being made  
785 individually by each province based on the expense as well as feasibility.<sup>192,193</sup> At present it is included  
786 in the provincial schedules in Quebec and Ontario but not in Nova Scotia or Alberta. The varying use of  
787 the vaccine and our goal to identify etiologic agents and to conduct sub-analyses will yield very  
788 important information related to probiotic use in the presence/absence of rotavirus vaccination. (5) Fecal  
789 sIgA levels will be sub-analyzed based on the mother's breast-feeding status.

## 790 791 **2.20 DATA SHARING**

792 Participant data will be stored in an online electronic data capture system (REDCap). Collected data will  
793 be downloaded at the coordinating centre in Calgary, Alberta Canada. In order to complete the planned  
794 subgroup and economic analyses, a de-identified dataset containing only the variables required will be  
795 shared with collaborating institutions. The planned economic analyses will be performed by the Program  
796 for Assessment of Technology in Health (PATH) Research Institute at McMaster University (Appendix  
797 9-Economic Analysis Plan) located in Hamilton, Ontario Canada. Data will also be shared with the  
798 University of Utah Data Coordinating Center (DCC) located in Salt Lake City, Utah USA. The DCC  
799 will integrate our study data with those from a companion clinical trial taking place in the United States  
800 (co-PIs Dr. Stephen Freedman and Dr. David Schnadower). Integration of data will allow for additional  
801 analyses to be performed that would be underpowered for either study to perform them in isolation.

802  
803 **Pathogen Load Quantification Data:** Specimens are received de-identified by the processing labs.  
804 Results of the pathogen load testing performed by Drs. Xiao-Li Pang, Linda Chui, and Bonita Lee will  
805 be compiled and entered in to a simple database. The de-identified database will be sent to the  
806 coordinating centre in Calgary, Alberta using a secure email service (Alberta Health Services). These  
807 results may be shared with the DCC in Salt Lake City, Utah.

808  
809 **Fecal Secretary IgA Data:** Fecal sIgA results will be entered in to a simple database. The database will  
810 be encrypted and sent to the Principal Investigator at the coordinating centre via institutional email. All  
811 participant results will be de-identified. De-identified specimens are received at the lab of Dr. Sherman  
812 located at the Hospital for Sick Children. These results may be shared with the DCC in Salt Lake City,  
813 Utah.

814

**815 2.21 HAS ANY PILOT STUDY BEEN CARRIED OUT USING THIS DESIGN?**

816 The participating research team members and PERC network have extensive experience conducting  
817 clinical research.<sup>4,82,91,147,191</sup> The network has monthly conference calls and the executive meets several  
818 times per year. Dr. Freedman, the Vice-Chair of PERC, has successfully completed and published  
819 several gastroenteritis clinical trials,<sup>66,194</sup> with publications in BMJ<sup>122</sup> and NEJM.<sup>79</sup> He additionally led a  
820 50 patient multicentre pilot study employing Lacidofil which provided promising preliminary data,  
821 evaluated the feasibility of the current proposal and identified potential problems. The pilot included a  
822 placebo group and two dosages: 4 x 10<sup>9</sup> CFU/day and 8 x 10<sup>9</sup> CFU/day. It did not detect a trend toward  
823 increased side effects in the 8 x 10<sup>9</sup> CFU/day arm; hence, to ensure our study has the optimal ability to  
824 answer the primary question, the 8 x 10<sup>9</sup> CFU/day dose will be used. Overall, 91% of all doses  
825 dispensed were administered. Key information data provided by the pilot were: (1) the safety of high  
826 dose Lacidofil, (2) anticipated recruitment and compliance estimates, (3) the revision of data collection  
827 forms, (4) the use of rectal swab for specimen collection (aside from sIgA), (5) the optimal rectal swab  
828 testing device, (6) day #5 instead of 7 compliance assessment, (7) modified follow-up protocol to  
829 minimize loss to follow-up, and (8) proved our ability to obtain Health Canada approval.

830

**831 3.0 TRIAL MANAGEMENT**

832

**833 3.1 WHAT ARE THE ARRANGEMENTS FOR DAY-TO-DAY MANAGEMENT OF THE**

834 **TRIAL? (APPENDIX 13)** WCHRI, based at the University of Alberta, will act as a central repository  
835 for all study data. Staffing will include a project manager, a medical informatics specialist and an  
836 assistant. WCHRI will be responsible for the provision of data collection technology and clinical data  
837 management services. WCHRI's staff has extensive experience and expertise in collecting data using  
838 REDCap software and managing study data in accordance with Good Clinical Practice requirements  
839 including the use of qualified and trained study personnel, study monitoring, standard operating  
840 procedures, validated software, data audit trails, and quality assurance. Study participating sites will  
841 retain the option of using the developed REDCap database as the primary method of data collection and  
842 storage. Due to the extensive validation completed by WCHRI, data can be obtained from the patient  
843 and then directly entered into the secure REDCap database via an electronic tablet (e.g. iPad<sup>®</sup>). Study  
844 sites may also collect data on paper case report forms, which would then be transcribed into the  
845 REDCap database. For all study data collected, source documentation will be defined in the Manual of  
846 Operations. The Alberta Children's Hospital (the PI's institution) serving as the coordinating centre, will  
847 be in constant communication with WCHRI, and will be responsible for study training, monitoring, and  
848 progress. Drs. Willan and Nettel-Aguirre will supervise all data analyses. Dr. Freedman will take overall  
849 responsibility for the study. Site Investigators and Clinical Research Assistants/Nurses will share  
850 responsibilities including day to day activities, payroll, study promotion, contacting caregivers, and  
851 reviewing charts.

852 Research Ethics Board (REB) and Health Canada approvals will be obtained. All ED physicians and  
853 nurses will be educated regarding the study and Clinical Research Assistants/Nurses will be trained.  
854 Sites have committed to having Clinical Research Assistants or Clinical Research Nurses present 75  
855 hours/week during peak season and volume periods (7 months/year). Their presence will maximize  
856 study enrollment by continuously reminding physicians about the study and enrolling eligible children.  
857 Participating institutions all have significant infrastructure in place and will use a variety of methods to  
858 optimize coverage while minimizing costs including Clinical Research Assistants or Nurses covering  
859 multiple studies and volunteer programs (e.g.

860 [www.sickkids.ca/HealthcareProfessionalsandStudents/clinical-research/index.html](http://www.sickkids.ca/HealthcareProfessionalsandStudents/clinical-research/index.html)).

861 The AHS Research Pharmacy will ship the study drug in batches to the participating institutions. The  
862 AHS Research Pharmacy will also maintain a batch of sachets which have not been randomized to be

863 sent to high recruiting sites. Collaborating pharmacies will be blinded to study drug and will be  
864 responsible for storage and providing study kits to the site Clinical Research Assistants/Nurses. Regular  
865 e-mail, weekly teleconferencing for the first 6 weeks of the trial, and monthly conference calls will be  
866 used to monitor start up and to obtain updates on recruitment and issues arising. Real-time data entry  
867 will facilitate an ongoing data cleaning plan. Double data entry will be employed on a random sampling  
868 of subjects at various time points throughout the study to ensure the data collected is accurate and is  
869 being recorded properly.

870 Drs. Pang, Louie and Chui will take responsibility for microbiologic testing, specimen storage  
871 and data management at ProvLab AB. They have extensive experience managing stool specimens and  
872 will correspond with the study team at ACH on a weekly basis.

873  
874 **3.2 WHAT WILL BE THE ROLE OF EACH INVESTIGATOR AND COLLABORATOR?** This  
875 study, under the umbrella of PERC brings together North American investigators with transdisciplinary  
876 expertise. Dr. Freedman who has expertise in AGE research,<sup>1,4,7,19,66,122,131,132,194-197</sup> recently reported<sup>79</sup>  
877 that ondansetron, an antiemetic agent, is effective in pediatric AGE. It is now routinely used to reduce  
878 the need for intravenous hydration and hospitalization.<sup>80,132,198-200</sup> Dr. Gorelick, a clinical  
879 epidemiologist,<sup>201-204</sup> with significant network research experience,<sup>205-209</sup> has provided senior guidance  
880 and high level input from a large research think-tank in the United States (Pediatric Emergency Care  
881 Applied Research Network-PECARN). Dr. Schuh<sup>83,186</sup> has successfully completed 15 pediatric ED  
882 RCTs and has guided the study since its inception. Dr. Johnson,<sup>82,186</sup> who has multicentre RCT  
883 experience has served as a resource regarding operational issues and will guide KT<sup>210-212</sup> efforts. Dr.  
884 Schnadower has led efforts to conduct a similar study in the United States and has served as a liaison  
885 with the Pediatric Emergency Medicine Collaborative Research Committee (Dr. Freedman is a steering  
886 committee member). Site investigators will supervise the study at their respective institutions. Dr. Philip  
887 Sherman has experience with Lacidofil<sup>69,71,213</sup> and his laboratory will perform the fecal sIgA  
888 analyses.<sup>96,97</sup> Drs. Willan and Nettel-Aguirre, both PhD statisticians, and Mr. Goeree, a health  
889 economist, will perform the statistical and economic evaluations. Dr. Willan is extensively involved in  
890 methodologic research in the area of health economics and optimizing decision-making in health care  
891 research and policy.<sup>214-216</sup> **Dr. Nettel-Aguirre** (co-applicant) is a biostatistician with extensive  
892 experience in analyzing health outcomes and related data from large, complex, linked datasets and in  
893 designing healthcare studies.<sup>217-221</sup>

894  
895 Microbiologic Team: **Dr. Yaron Finkelstein** (co-PA), a board-certified clinical pharmacologist and  
896 pediatric emergency medicine physician has conducted multiple RCTs exploring pharmacometrics and  
897 safety in infected pediatric<sup>222,223</sup> and general<sup>224</sup> populations in addition to pathogen-specific efficacy  
898 studies in infectious gastrointestinal diseases.<sup>225,226</sup> Drs. Freedman and Finkelstein have successfully  
899 collaborated on several pediatric AGE and clinical medication studies.<sup>224,227-229</sup> Our team includes **Drs.**  
900 **Xiao-li (Lilly) Pang and Bonita Lee** (co-applicants) who have collaborated extensively<sup>167,230</sup> and have  
901 developed numerous assays for virus detection,<sup>163,164,169,230,231</sup> and quantification.<sup>166,232-234</sup> They will  
902 share joint responsibility for all viral analyses. **Dr. Linda Chui** (co-applicant), who has done extensive  
903 work in the development of protocols for the molecular detection of non-traditional enteric bacteria (i.e.  
904 non-O157 STEC) employing real-time PCR,<sup>235-239</sup> will be responsible for the quantification of stool  
905 bacterial load which is a natural extension of her molecular work and expertise in this area.<sup>232,237,240,241</sup>  
906 **Dr. Marie Louie** (co-applicant), an infectious disease specialist and medical microbiologist with  
907 expertise investigating and managing the public health implications of enteric pathogens,<sup>240,242,243</sup> will  
908 lead knowledge translation efforts within the microbiology community.

909  
910 Working with stool from children with norovirus (n=244) and rotavirus (n=102), our team (Pang, Lee)  
911 has developed and validated real-time quantitative PCR assays to measure enteric virus genomic nucleic

912 acid (NA) in stool (i.e. quantify stool viral load; see Appendix 3). A standard curve has been  
913 established employing known genomic copies of DNA fragments, which have then undergone 10-fold  
914 dilutions from a single copy to  $1 \times 10^8$  copies. Our team (Chui) has established a bacterial DNA  
915 extraction protocol which yields high quality and quantity of DNA. This led to the whole-genome  
916 sequencing of 200 bacterial isolates which identified biomarkers for the development of amplification  
917 assays, both loop-mediated isothermal amplification (LAMP) and real-time polymerase chain reaction  
918 (PCR) assays. Both assays have excellent sensitivity and no evidence of cross reactivity has been  
919 observed. These quantitative assays have been correlated with colony forming unit (CFU) counts with  
920 crossing point values in the real-time PCR assay.

921

922 All team members will be aided by WCHRI, MICYRN, the Clinical Research Coordinator, and the site  
923 Clinical Research Assistants or Nurses. Each study site has a dedicated study research coordinator who  
924 is responsible for organizing the conduct of the study at their respective institutions. Supporting the  
925 pathogen effectiveness work, lab research technologists have extensive experience with specimen  
926 processing, handling, storage, and testing.

927

### 928 **3.3 DESCRIBE THE TRIAL STEERING COMMITTEE AND THE DATA SAFETY AND** 929 **MANAGEMENT COMMITTEE. *Trial Steering Committee:***

930 knowledge users, caregivers, pediatricians, emergency medicine physicians, gastroenterologists, and  
931 infectious disease physicians. The protocol has been revised based on guidance provided by the PERC  
932 and PECARN networks. Non-research team members who have had extensive input include clinicians,  
933 statisticians, ethicists, and coordinators with multicentre research expertise. Official committee members  
934 have included senior clinical research team members (Drs. Gorelick, Schuh, Johnson), Dr. Sherman, a  
935 Canada Research Chair in Gastrointestinal Disease (selection of probiotic agent, dose, duration of  
936 therapy, and planned translational studies), Dr. Kuppermann,<sup>181,244-248</sup> the past-Chair of PECARN, Dr.  
937 Dean,<sup>249-253</sup> expert in conduct of multicentre network research, and Dr. Plint, the Chair of PERC. This  
938 has ensured that the study will answer important questions that can readily be applied by these leading  
939 KT research networks.<sup>210-212</sup> ***Data Safety Monitoring Board (section 2.18 also):*** There will be an  
940 independent monitoring committee consisting of a biostatistician (Nick Barrowman, PhD-Ottawa), and  
941 two physicians with RCT expertise (Drs. Mark Roback–Minnesota and Terry Klassen (Chair) -  
942 Winnipeg). This committee will be independent of the investigators and will be advised of all adverse  
943 events.

944

### 945 **3.4 ADVERSE EVENT REPORTING**

946 **Adverse Event (AE):** An adverse event is any unfavorable or unintended clinical or other occurrence  
947 during the study period that may or may not be the result of participation in the research study.

948

### 949 **Expected Adverse Drug Reactions/Events**

950 These include the following as they are part of the natural history of the underlying disease process:

- 951 • Hospitalization
- 952 • Future health care provider visit, ED return visit
- 953 • IV rehydration
- 954 • Abdominal pain, distension
- 955 • Vomiting, diarrhea, fever, flatulence

956 Because expected adverse events are part of the natural history of acute gastroenteritis and diarrheal  
957 illness in children, they will not need to be reported as Adverse Events. This information will be  
958 recorded in normal study data collection processes.

959

### 960 **Serious Adverse Events**

961 Any Serious Adverse Event (SAE) that occurs after the first sachet administered will be reported to the  
962 Research Ethics Board (REB) and the study subject will be followed until the conclusion of the event.  
963

964 A SAE is defined as:

- 965 • Results in death.
- 966 • Is life-threatening. This refers to an event in which the patient was at immediate risk of death; it  
967 does not refer to an event that might have caused death had it been more severe.
- 968 • Results in a persistent or significant disability/incapacity
- 969 • Results in a congenital anomaly/birth defect
- 970 • Is medically significant. Important medical events that may not result in death, be life-  
971 threatening, or require hospitalization may be considered SAEs when, based upon appropriate  
972 medical judgment, may jeopardize the patient and may require medical or surgical intervention to  
973 prevent one of the outcomes listed in this definition.  
974

975 In addition, any serious adverse reaction to the natural health product will be reported to the Natural  
976 Health Product Directorate (NHPD).  
977

### 978 **Adverse Event Reports**

979 For unexpected adverse events, we will inform the REB, in addition to the clinical chief of the ED, and  
980 the external sponsor within 7 days of learning of the event, if applicable and deemed necessary by the  
981 Principal Investigator.

982 For unexpected SAEs, we will inform the REB, in addition to the clinical chief of the ED, and the  
983 external sponsor within 24 hours of learning of the event (by AE form, telephone or email). The SAE  
984 information will be sent even if the information is incomplete. A complete follow-up AE report will be  
985 submitted as soon as possible but no later than 7 days after the initial reporting.  
986

### 987 **Collaborating Study Sites**

988 The principal investigator or delegate will also submit to the University of Calgary REB information  
989 received from other sites. Conversely, serious adverse events that occur at The Alberta Children's  
990 Hospital (The University of Calgary) will be communicated by the principal investigator to  
991 collaborating sites, as their local requirements dictate. To ensure that data remains confidential and  
992 unbiased, a medical monitor will be appointed at the sponsoring institution (The University of Calgary).  
993 The medical monitor will be an Emergency Department physician with expertise in clinical research.  
994 The medical monitor will review adverse event information from collaborating study sites, in lieu of the  
995 principal investigator. The principal investigator (as the sponsor) will still maintain the responsibility of  
996 reviewing any Serious Adverse Events occurring at any of the participating study sites.  
997

998

999

### 999 **Adverse Event Coding:**

1000 Adverse Event (AE) data will be reviewed by trained staff and coded using the Medical Dictionary for  
1001 Regulatory Activity (MedDRA - <https://www.meddra.org/>) system. Adverse Event data will be collected  
1002 from participants at the time of the event. MedDRA coding will be assigned to each event at the end of  
1003 the recruiting period.  
1004

### 1005 **Health Canada (Natural Health Product Directorate) Reporting**

1006 Adverse drug reactions (ADR) that are both serious and unexpected are subject to expedited reporting to  
1007 Health Canada (NHPD) *by the sponsor*. These include reactions;

1008

- 1009 • Where it is fatal or life-threatening, immediately where possible and, in any event, within 7 days  
1010 after becoming aware of the information

- 1011 • A complete follow up report within 8 days which includes an assessment of the importance and  
1012 implication of any findings including relevant previous experience with the same or similar drugs  
1013 • Where it is neither fatal nor life-threatening within 15 days after becoming aware of the information  
1014

1015 Each ADR which is subject to expedited reporting will be reported individually in accordance with the  
1016 data element(s) specified in Section 78 of the *NHP Regulations*, ICH Guidance Document *E2A: Clinical  
1017 Safety Data Management: Definitions and Standards for Expedited Reporting*.  
1018

### 1019 Emergency Unblinding

1020 Un-blinding should only occur in the event that there is clinical concern regarding the possibility of  
1021 bacteremia/septicemia or when it is felt by the treating physician that unblinding would alter the clinical  
1022 care being provided. All patients whose therapy is intentionally un-blinded will discontinue the  
1023 experimental therapy. Un-blinding should only occur when future clinical treatment of the patient will  
1024 depend on prior treatment administered. Approval from the principal investigator or designate will be  
1025 obtained prior to un-blinding. If the principal investigator cannot be reached, the un-blinding can be  
1026 performed and the principal investigator informed within 24 hours via e-mail or telephone call.  
1027 Accidental and intentional un-blinding will be documented and reported and the subject will be  
1028 withdrawn from the study.  
1029

### 1030 **3.5 PREMATURE WITHDRAWAL/DISCONTINUATION CRITERIA**

1031 The subjects retain the right to withdraw from the study at any time, although withdrawal from the study  
1032 is strongly discouraged after the subject has been enrolled.  
1033

1034 Every effort will be made to contact all subjects for follow-up as scheduled. Subjects will be withdrawn  
1035 from the study if:

- 1036 1. After enrollment they are determined to meet any of the exclusion criteria
- 1037 2. If the subject is admitted to an intensive care unit
- 1038 3. If it is deemed by the treating physician that the child's health may be jeopardized by continued  
1039 participation in the study
- 1040 4. The patient's caregivers wish to withdraw their child for whatever reason  
1041

1042 If the patient's caregiver chooses to withdraw their child from the study, they will be provided with a  
1043 choice regarding their exit from the study:

- 1044 1. The caregiver may choose to withdraw the child from the study, as well as all data collected from  
1045 their child's participation in the study
- 1046 2. The caregiver may choose to withdraw their child from the study; however they will allow  
1047 continued use of study data collected from their child.  
1048

### 1049 **3.6 RECORD KEEPING**

1050 The data produced from this study will be stored in a secure, locked location. Only members of the  
1051 research team will have access to the data. Following completion of the research study the data will be  
1052 stored and kept for a minimum of 25 years. The data will then be destroyed in accordance with the  
1053 University of Calgary and Tri Council destruction policy for clinical trial documentation.  
1054  
1055

1056

- 1057 1. Freedman SB, Steiner M, Chan K. Oral Ondansetron Administration in Emergency Departments  
1058 to Children with Gastroenteritis: An Economic Analysis. *PLoS Med* 7(10): e1000350  
1059 doi:101371/journalpmed1000350 2010.
- 1060 2. Senecal M, Brisson M, Lebel MH, et al. Measuring the Impact of Rotavirus Acute  
1061 Gastroenteritis Episodes (MIRAGE): A prospective community-based study. *The Canadian journal of*  
1062 *infectious diseases & medical microbiology = Journal canadien des maladies infectieuses et de la*  
1063 *microbiologie medicale / AMMI Canada* 2008;19:397-404.
- 1064 3. Le Saux N, Bettinger JA, Halperin SA, Vaudry W, Scheifele DW. Substantial morbidity for  
1065 hospitalized children with community-acquired rotavirus infections: 2005-2007 IMPACT surveillance in  
1066 Canadian hospitals. *Pediatr Infect Dis J* 2010;29:879-82.
- 1067 4. Freedman SB, Gouin S, Bhatt M, et al. Prospective assessment of practice pattern variations in  
1068 the treatment of pediatric gastroenteritis. *Pediatrics* 2011;127:e287-95.
- 1069 5. Carroll AE, Downs SM. Improving decision analyses: parent preferences (utility values) for  
1070 pediatric health outcomes. *J Pediatr* 2009;155:21-5, 5 e1-5.
- 1071 6. Dennehy PH. Transmission of rotavirus and other enteric pathogens in the home. *Pediatr Infect*  
1072 *Dis J* 2000;19:S103-5.
- 1073 7. Freedman SB, Eltorkey M, Gorelick M, Pediatric Emergency Research Canada Gastroenteritis  
1074 Study G. Evaluation of a gastroenteritis severity score for use in outpatient settings. *Pediatrics*  
1075 2010;125:e1278-85.
- 1076 8. Mast TC, DeMuro-Mercon C, Kelly CM, Floyd LE, Walter EB. The impact of rotavirus  
1077 gastroenteritis on the family. *BMC Pediatr* 2009;9:11.
- 1078 9. Salminen S, Ouwehand A, Benno Y, Lee YK. Probiotics: how should they be defined? *Trend*  
1079 *Food Sci Technol* 1999;10:107-10.
- 1080 10. National Center for Complementary and Alternative Medicine at the National Institutes of  
1081 Health. Oral Probiotics: An Introduction. 2011. (Accessed August 27, 2012, at  
1082 <http://nccam.nih.gov/health/probiotics/introduction.htm>.)
- 1083 11. Salari P, Nikfar S, Abdollahi M. A meta-analysis and systematic review on the effect of  
1084 probiotics in acute diarrhea. *Inflamm Allergy Drug Targets* 2012;11:3-14.
- 1085 12. Allen SJ, Martinez EG, Gregorio GV, Dans LF. Probiotics for treating acute infectious diarrhoea.  
1086 *Cochrane Database of Systematic Reviews* 2010;11:CD003048.
- 1087 13. Hom J. Do probiotics reduce the duration and symptoms of acute infectious diarrhea? *Ann*  
1088 *Emerg Med* 2011;58:445-6.
- 1089 14. King CK, Glass R, Bresee JS, Duggan C. Managing acute gastroenteritis among children: oral  
1090 rehydration, maintenance, and nutritional therapy. *MMWR Recomm Rep* 2003;52:1-16.
- 1091 15. D'Souza AL, Rajkumar C, Cooke J, Bulpitt CJ. Probiotics in prevention of antibiotic associated  
1092 diarrhoea: meta-analysis. *BMJ (Clinical Research Ed)* 2002;324:1361.
- 1093 16. Reid G, Jass J, Sebulsky MT, McCormick JK. Potential uses of probiotics in clinical practice.  
1094 *Clin Microbiol Rev* 2003;16:658-72.
- 1095 17. Li ST, Klein EJ, Tarr PI, Denno DM. Parental management of childhood diarrhea. *Clin Pediatr*  
1096 *(Phila)* 2009;48:295-303.
- 1097 18. Vernacchio L, Vezina RM, Mitchell AA, Lesko SM, Plaut AG, Acheson DW. Diarrhea in  
1098 American infants and young children in the community setting: incidence, clinical presentation and  
1099 microbiology. *Pediatr Infect Dis J* 2006;25:2-7.
- 1100 19. Freedman SB, Sivabalasundaram V, Bohn V, Powell EC, Johnson DW, Boutis K. The treatment  
1101 of pediatric gastroenteritis: a comparative analysis of pediatric emergency physicians' practice patterns.  
1102 *Acad Emerg Med* 2011;18:38-45.
- 1103 20. Rochon PA, Sekeres M, Hoey J, et al. Investigator experiences with financial conflicts of interest  
1104 in clinical trials. *Trials* 2011;12:9.

- 1105 21. Crocetti MT, Amin DD, Scherer R. Assessment of risk of bias among pediatric randomized  
1106 controlled trials. *Pediatrics* 2010;126:298-305.
- 1107 22. Martinez-Castaldi C, Silverstein M, Bauchner H. Child versus adult research: the gap in high-  
1108 quality study design. *Pediatrics* 2008;122:52-7.
- 1109 23. Cohen E, Goldman RD, Ragone A, et al. Child vs adult randomized controlled trials in specialist  
1110 journals: a citation analysis of trends, 1985-2005. *Archives of Pediatrics and Adolescent Medicine*  
1111 2010;164:283-8.
- 1112 24. Freedman SB. Parental probiotic knowledge. Unpublished raw data. The Hospital for Sick  
1113 Children; 2010.
- 1114 25. Navaneethan U, Giannella RA. Mechanisms of infectious diarrhea. *Nat Clin Pract Gastroenterol*  
1115 *Hepatol* 2008;5:637-47.
- 1116 26. Corr SC, Hill C, Gahan CG. Understanding the mechanisms by which probiotics inhibit  
1117 gastrointestinal pathogens. *Adv Food Nutr Res* 2009;56:1-15.
- 1118 27. National Collaborating Centre for Women's and Children's Health. Diarrhoea and vomiting  
1119 caused by gastroenteritis: diagnosis, assessment and management in children younger than 5 years:  
1120 Commissioned by the National Institute for Health and Clinical Excellence; Available at:  
1121 [http://www.nice.org.uk/guidance/cg84/resources/cg84-diarrhoea-and-vomiting-in-children-under-5-full-](http://www.nice.org.uk/guidance/cg84/resources/cg84-diarrhoea-and-vomiting-in-children-under-5-full-guideline2)  
1122 [guideline2](http://www.nice.org.uk/guidance/cg84/resources/cg84-diarrhoea-and-vomiting-in-children-under-5-full-guideline2). Accessed October 15, 2014; April 2009; London, UK.
- 1123 28. Weizman Z. Probiotics use in childhood acute diarrhea: a web-based survey. *J Clin Gastroenterol*  
1124 2011;45:426-8.
- 1125 29. Vandenas Y, Salvatore S, Viera M, Devreker T, Hauser B. Probiotics in infectious diarrhoea in  
1126 children: are they indicated? *Eur J Pediatr* 2007.
- 1127 30. Katan MB. Why the European Food Safety Authority was right to reject health claims for  
1128 probiotics. *Benef Microbes* 2012;3:85-9.
- 1129 31. Vero V, Gasbarrini A. The EFSA health claims 'learning experience'. *Int J Food Sci Nutr*  
1130 2012;63 Suppl 1:14-6.
- 1131 32. Flynn A. Scientific substantiation of health claims in the EU. *Proc Nutr Soc* 2012;71:120-6.
- 1132 33. Heimbach JT. Health-benefit claims for probiotic products. *Clin Infect Dis* 2008;46 Suppl  
1133 2:S122-4; discussion S44-51.
- 1134 34. Global probiotics market worth US\$32.6 billion by 2014. 2012. (Accessed July 27th 2012, 2012,  
1135 at [http://www.marketsandmarkets.com/PressReleases/global-probiotics-market-worth-US-32-billion-by-](http://www.marketsandmarkets.com/PressReleases/global-probiotics-market-worth-US-32-billion-by-2014.asp)  
1136 [2014.asp](http://www.marketsandmarkets.com/PressReleases/global-probiotics-market-worth-US-32-billion-by-2014.asp).)
- 1137 35. Coppens P, da Silva MF, Pettman S. European regulations on nutraceuticals, dietary supplements  
1138 and functional foods: a framework based on safety. *Toxicology* 2006;221:59-74.
- 1139 36. Saldanha LG. US Food and Drug Administration regulations governing label claims for food  
1140 products, including probiotics. *Clin Infect Dis* 2008;46 Suppl 2:S119-21; discussion S44-51.
- 1141 37. von Wright A. Regulating the safety of probiotics--the European approach. *Curr Pharm Des*  
1142 2005;11:17-23.
- 1143 38. Use of Lactobacillus GG in Children with Acute Gastroenteritis. 2011. (Accessed July 27th,  
1144 2012, at  
1145 [http://www.google.com/url?sa=t&rct=j&q=&esrc=s&source=web&cd=3&ved=0CFsQFjAC&url=http%](http://www.google.com/url?sa=t&rct=j&q=&esrc=s&source=web&cd=3&ved=0CFsQFjAC&url=http%3A%2F%2Fwww.cincinnatichildrens.org%2FWorkArea%2Flinkit.aspx%3FLinkIdentifier%3Did%26ItemID%3D88039%26libID%3D87727&ei=FK0SUJXFN4iirAH65oHYDQ&usq=AFQjCNE8lhSeTiAUcY3kmdemCHBt3HfmXQ)  
1146 [3A%2F%2Fwww.cincinnatichildrens.org%2FWorkArea%2Flinkit.aspx%3FLinkIdentifier%3Did%26It](http://www.google.com/url?sa=t&rct=j&q=&esrc=s&source=web&cd=3&ved=0CFsQFjAC&url=http%3A%2F%2Fwww.cincinnatichildrens.org%2FWorkArea%2Flinkit.aspx%3FLinkIdentifier%3Did%26ItemID%3D88039%26libID%3D87727&ei=FK0SUJXFN4iirAH65oHYDQ&usq=AFQjCNE8lhSeTiAUcY3kmdemCHBt3HfmXQ)  
1147 [emID%3D88039%26libID%3D87727&ei=FK0SUJXFN4iirAH65oHYDQ&usq=AFQjCNE8lhSeTiAU](http://www.google.com/url?sa=t&rct=j&q=&esrc=s&source=web&cd=3&ved=0CFsQFjAC&url=http%3A%2F%2Fwww.cincinnatichildrens.org%2FWorkArea%2Flinkit.aspx%3FLinkIdentifier%3Did%26ItemID%3D88039%26libID%3D87727&ei=FK0SUJXFN4iirAH65oHYDQ&usq=AFQjCNE8lhSeTiAUcY3kmdemCHBt3HfmXQ)  
1148 [cY3kmdemCHBt3HfmXQ](http://www.google.com/url?sa=t&rct=j&q=&esrc=s&source=web&cd=3&ved=0CFsQFjAC&url=http%3A%2F%2Fwww.cincinnatichildrens.org%2FWorkArea%2Flinkit.aspx%3FLinkIdentifier%3Did%26ItemID%3D88039%26libID%3D87727&ei=FK0SUJXFN4iirAH65oHYDQ&usq=AFQjCNE8lhSeTiAUcY3kmdemCHBt3HfmXQ).)
- 1149 39. Guyatt G, Montori V, Devereaux PJ, Schunemann H, Bhandari M. Patients at the center: in our  
1150 practice, and in our use of language. *ACP journal club* 2004;140:A11-2.
- 1151 40. Johnston BC, Shamseer L, da Costa BR, Tsuyuki RT, Vohra S. Measurement issues in trials of  
1152 pediatric acute diarrheal diseases: a systematic review. *Pediatrics* 2010;126:e222-31.

- 1153 41. Das RR. Should Probiotics be Used in the Treatment of Acute Childhood Diarrhea? *J Clin*  
1154 *Gastroenterol* 2012;46:526-7.
- 1155 42. Guandalini S. Probiotics for children with diarrhea: an update. *J Clin Gastroenterol* 2008;42  
1156 *Suppl 2*:S53-7.
- 1157 43. Coffin SE, Elser J, Marchant C, et al. Impact of acute rotavirus gastroenteritis on pediatric  
1158 outpatient practices in the United States. *Pediatr Infect Dis J* 2006;25:584-9.
- 1159 44. Szajewska H, Skorka A, Ruszczynski M, Gieruszczak-Bialek D. Meta-analysis: *Lactobacillus*  
1160 *GG* for treating acute diarrhoea in children. *Aliment Pharmacol Ther* 2007;25:871-81.
- 1161 45. Szymanski H, Pejcz J, Jawien M, Chmielarczyk A, Strus M, Heczko PB. Treatment of acute  
1162 infectious diarrhoea in infants and children with a mixture of three *Lactobacillus rhamnosus* strains--a  
1163 randomized, double-blind, placebo-controlled trial. *Aliment Pharmacol Ther* 2006;23:247-53.
- 1164 46. Huang JS, Bousvaros A, Lee JW, Diaz A, Davidson EJ. Efficacy of probiotic use in acute  
1165 diarrhea in children: a meta-analysis. *Dig Dis Sci* 2002;47:2625-34.
- 1166 47. Van Niel CW, Feudtner C, Garrison MM, Christakis DA. *Lactobacillus* therapy for acute  
1167 infectious diarrhea in children: a meta-analysis. *Pediatrics* 2002;109:678-84.
- 1168 48. Vandenplas Y, Salvatore S, Vieira M, Devreker T, Hauser B. Probiotics in infectious diarrhoea  
1169 in children: are they indicated? *Eur J Pediatr* 2007;166:1211-8.
- 1170 49. Hoffman FA, Heimbach JT, Sanders ME, Hibberd PL. Executive summary: scientific and  
1171 regulatory challenges of development of probiotics as foods and drugs. *Clin Infect Dis* 2008;46 *Suppl*  
1172 *2*:S53-7.
- 1173 50. Szajewska H, Mrukowicz JZ. Use of probiotics in children with acute diarrhea. *Paediatr Drugs*  
1174 *2005*;7:111-22.
- 1175 51. Nixon AF, Cunningham SJ, Cohen HW, Crain EF. The effect of *Lactobacillus GG* (LGG) on  
1176 acute diarrheal illness in the pediatric emergency department (PED). *Pediatric Academic Societies'*  
1177 *2010 Annual Meeting [abstract]*. Vancouver, Canada; in press *Pediatr Emerg Care*.
- 1178 52. Walker WA. Mechanisms of action of probiotics. *Clin Infect Dis* 2008;46 *Suppl 2*:S87-91;  
1179 discussion S144-51.
- 1180 53. Sarker SA, Fuchs GJ. The role of probiotics in the treatment and prevention of infectious  
1181 diarrhea in children. In: Michail S, Sherman PM, eds. *Proboitics in pediatric medicine*. Totowa, NJ:  
1182 *Humana Press*; 2009.
- 1183 54. Tannock GW, Munro K, Harmsen HJ, Welling GW, Smart J, Gopal PK. Analysis of the fecal  
1184 microflora of human subjects consuming a probiotic product containing *Lactobacillus rhamnosus DR20*.  
1185 *Applied and environmental microbiology* 2000;66:2578-88.
- 1186 55. Michail S, Abernathy F. *Lactobacillus plantarum* reduces the in vitro secretory response of  
1187 intestinal epithelial cells to enteropathogenic *Escherichia coli* infection. *J Pediatr Gastroenterol Nutr*  
1188 *2002*;35:350-5.
- 1189 56. Hooper LV, Wong MH, Thelin A, Hansson L, Falk PG, Gordon JI. Molecular analysis of  
1190 commensal host-microbial relationships in the intestine. *Science* 2001;291:881-4.
- 1191 57. Neish AS, Gewirtz AT, Zeng H, et al. Prokaryotic regulation of epithelial responses by inhibition  
1192 of IkappaB-alpha ubiquitination. *Science* 2000;289:1560-3.
- 1193 58. Pessi T, Sutas Y, Hurme M, Isolauri E. Interleukin-10 generation in atopic children following  
1194 oral *Lactobacillus rhamnosus GG*. *Clin Exp Allergy* 2000;30:1804-8.
- 1195 59. Majamaa H, Isolauri E. Probiotics: a novel approach in the management of food allergy. *J*  
1196 *Allergy Clin Immunol* 1997;99:179-85.
- 1197 60. Wolvers D, Antoine JM, Myllyluoma E, Schrezenmeir J, Szajewska H, Rijkers GT. Guidance for  
1198 Substantiating the Evidence for Beneficial Effects of Probiotics: Prevention and Management of  
1199 Infections by Probiotics. *J Nutr* 2010.
- 1200 61. Canani RB, Cirillo P, Terrin G, et al. Probiotics for treatment of acute diarrhoea in children:  
1201 randomised clinical trial of five different preparations. *BMJ (Clinical Research Ed)* 2007;335:340.

- 1202 62. Food and Agriculture Organization of the United Nations, World Health Organization. Joint  
1203 FAO/WHO expert consultation on evaluation of health and nutritional properties of probiotics in food  
1204 including powder milk and live lactic acid bacteria 2001.
- 1205 63. Reid G, Kirjaivanen P. Taking probiotics during pregnancy. Are they useful therapy for mothers  
1206 and newborns? *Can Fam Physician* 2005;51:1477-9.
- 1207 64. Sanders M, Morelli L, Bush S. "Lactobacillus sporogenes" is not a *Lactobacillus* probiotic. *ASM*  
1208 *News* 2001;67:385-6.
- 1209 65. Sherman PM, Johnson-Henry KC, Yeung HP, Ngo PS, Goulet J, Tompkins TA. Probiotics  
1210 reduce enterohemorrhagic *Escherichia coli* O157:H7- and enteropathogenic *E. coli* O127:H6-induced  
1211 changes in polarized T84 epithelial cell monolayers by reducing bacterial adhesion and cytoskeletal  
1212 rearrangements. *Infection and Immunity* 2005;73:5183-8.
- 1213 66. Freedman SB, Couto M, Spooner L, Haladyn JK. The implementation of a gastroenteritis  
1214 education program. *Am J Emerg Med* 2011;29:271-7.
- 1215 67. Wine E, Gareau MG, Johnson-Henry K, Sherman PM. Strain-specific probiotic (*Lactobacillus*  
1216 *helveticus*) inhibition of *Campylobacter jejuni* invasion of human intestinal epithelial cells. *FEMS*  
1217 *Microbiol Lett* 2009;300:146-52.
- 1218 68. Johnson-Henry KC, Mitchell DJ, Avitzur Y, Galindo-Mata E, Jones NL, Sherman PM.  
1219 Probiotics reduce bacterial colonization and gastric inflammation in *H. pylori*-infected mice. *Dig Dis Sci*  
1220 2004;49:1095-102.
- 1221 69. Johnson-Henry KC, Nadjafi M, Avitzur Y, et al. Amelioration of the effects of *Citrobacter*  
1222 *rodentium* infection in mice by pretreatment with probiotics. *The Journal of infectious diseases*  
1223 2005;191:2106-17.
- 1224 70. Gareau MG, Jury J, MacQueen G, Sherman PM, Perdue MH. Probiotic treatment of rat pups  
1225 normalises corticosterone release and ameliorates colonic dysfunction induced by maternal separation.  
1226 *Gut* 2007;56:1522-8.
- 1227 71. Zareie M, Johnson-Henry K, Jury J, et al. Probiotics prevent bacterial translocation and improve  
1228 intestinal barrier function in rats following chronic psychological stress. *Gut* 2006;55:1553-60.
- 1229 72. Rijkers GT, Bengmark S, Enck P, et al. Guidance for Substantiating the Evidence for Beneficial  
1230 Effects of Probiotics: Current Status and Recommendations for Future Research. *J Nutr* 2010.
- 1231 73. Reid G, Hammond JA. Probiotics. Some evidence of their effectiveness. *Canadian Family*  
1232 *Physician* 2005;51:1487-93.
- 1233 74. Szajewska H, Mrukowicz JZ. Probiotics in the treatment and prevention of acute infectious  
1234 diarrhea in infants and children: a systematic review of published randomized, double-blind, placebo-  
1235 controlled trials. *J Pediatr Gastroenterol Nutr* 2001;33 Suppl 2:S17-25.
- 1236 75. Huang JS, Bousvaros A, Lee JW, Diaz A, Davidson EJ. Efficacy of probiotic use in acute  
1237 diarrhea in children: a meta-analysis. *Dig Dis Sci* 2002;47:2625-34.
- 1238 76. Dinleyici EC, Eren M, Ozen M, Yargic ZA, Vandenplas Y. Effectiveness and safety of  
1239 *Saccharomyces boulardii* for acute infectious diarrhea. *Expert Opin Biol Ther* 2012;12:395-410.
- 1240 77. Szajewska H, Mrukowicz JZ. Use of probiotics in children with acute diarrhea. *Paediatr Drugs*  
1241 2005;7:111-22.
- 1242 78. Pappano D, Connors G, McIntosh S, Humiston S, Roma D. Sources of knowledge transfer  
1243 among primary care pediatric health care providers. *Clin Pediatr (Phila)* 2008;47:930-4.
- 1244 79. Freedman SB, Adler M, Seshadri R, Powell EC. Oral ondansetron for gastroenteritis in a  
1245 pediatric emergency department. *N Engl J Med* 2006;354:1698-705.
- 1246 80. Sturm JJ, Hirsh DA, Schweickert A, Massey R, Simon HK. Ondansetron Use in the Pediatric  
1247 Emergency Department and Effects on Hospitalization and Return Rates: Are We Masking Alternative  
1248 Diagnoses? *Ann Emerg Med* 2009.
- 1249 81. Johnson D. Croup. *Clin Evid (Online)* 2009;2009.

- 1250 82. Bjornson CL, Klassen TP, Williamson J, et al. A randomized trial of a single dose of oral  
1251 dexamethasone for mild croup. *The New England journal of medicine* 2004;351:1306-13.
- 1252 83. Schuh S, Reisman J, Alshehri M, et al. A comparison of inhaled fluticasone and oral prednisone  
1253 for children with severe acute asthma. *The New England journal of medicine* 2000;343:689-94.
- 1254 84. Vuillermin P, South M, Robertson C. Parent-initiated oral corticosteroid therapy for intermittent  
1255 wheezing illnesses in children. *Cochrane Database of Systematic Reviews* 2006;3:CD005311.
- 1256 85. Reid G. Safety of lactobacillus strains as probiotic agents. *Clin Infect Dis* 2002;35:349-50.
- 1257 86. Land MH, Rouster-Stevens K, Woods CR, Cannon ML, Cnota J, Shetty AK. Lactobacillus  
1258 sepsis associated with probiotic therapy. *Pediatrics* 2005;115:178-81.
- 1259 87. Kunz AN, Noel JM, Fairchok MP. Two cases of Lactobacillus bacteremia during probiotic  
1260 treatment of short gut syndrome. *J Pediatr Gastroenterol Nutr* 2004;38:457-8.
- 1261 88. De Groot MA, Frank DN, Dowell E, Glode MP, Pace NR. Lactobacillus rhamnosus GG  
1262 bacteremia associated with probiotic use in a child with short gut syndrome. *Pediatr Infect Dis J*  
1263 2005;24:278-80.
- 1264 89. Moher D, Hopewell S, Schulz KF, et al. CONSORT 2010 explanation and elaboration: updated  
1265 guidelines for reporting parallel group randomised trials. *BMJ (Clinical Research Ed)* 2010;340:c869.
- 1266 90. Schulz KF, Altman DG, Moher D. CONSORT 2010 statement: updated guidelines for reporting  
1267 parallel group randomised trials. *BMJ (Clinical Research Ed)* 2010;340:c332.
- 1268 91. Plint AC, Johnson DW, Patel H, et al. Epinephrine and dexamethasone in children with  
1269 bronchiolitis. *N Engl J Med* 2009;360:2079-89.
- 1270 92. Chapman CM, Gibson GR, Rowland I. Health benefits of probiotics: are mixtures more effective  
1271 than single strains? *Eur J Nutr* 2011;50:1-17.
- 1272 93. Cabana MD, Shane AL, Chao C, Oliva-Hemker M. Probiotics in primary care pediatrics. *Clin*  
1273 *Pediatr (Phila)* 2006;45:405-10.
- 1274 94. Tlaskal P, Schramlova J, Kokesova A, et al. Probiotics in the treatment of diarrheal disease of  
1275 viral etiology in children. *NAFAS* 2005;3:25-8.
- 1276 95. Szajewska H, Setty M, Mrukowicz J, Guandalini S. Probiotics in gastrointestinal diseases in  
1277 children: hard and not-so-hard evidence of efficacy. *J Pediatr Gastroenterol Nutr* 2006;42:454-75.
- 1278 96. Gao Y, Sherman PM, Sun Y, Li D. Multiplexed high-throughput electrokinetically-controlled  
1279 immunoassay for the detection of specific bacterial antibodies in human serum. *Analytica Chimica Acta*  
1280 2008;606:98-107.
- 1281 97. Lin FY, Gao Y, Li D, Sherman PM. Development of microfluidic-based heterogeneous  
1282 immunoassays. *Front Biosci (Schol Ed)* 2010;2:73-84.
- 1283 98. Gorelick MH, Shaw KN, Murphy KO. Validity and reliability of clinical signs in the diagnosis of  
1284 dehydration in children. *Pediatrics* 1997;99:E6.
- 1285 99. Lewis JA, Machin D. Intention to treat--who should use ITT? *Br J Cancer* 1993;68:647-50.
- 1286 100. Marshall M, Lockwood A, Bradley C, Adams C, Joy C, Fenton M. Unpublished rating scales: a  
1287 major source of bias in randomised controlled trials of treatments for schizophrenia. *Br J Psychiatry*  
1288 2000;176:249-52.
- 1289 101. World Health Organization. The treatment of diarrhoea: A manual for physicians and other  
1290 senior health workers. 4th revision.: WHO Press; 2005.
- 1291 102. Shornikova AV, Casas IA, Isolauri E, Mykkanen H, Vesikari T. Lactobacillus reuteri as a  
1292 therapeutic agent in acute diarrhea in young children. *J Pediatr Gastroenterol Nutr* 1997;24:399-404.
- 1293 103. Villarruel G, Rubio DM, Lopez F, et al. Saccharomyces boulardii in acute childhood diarrhoea: a  
1294 randomized, placebo-controlled study. *Acta Paediatr* 2007;96:538-41.
- 1295 104. Brandt CD, Kim HW, Rodriguez WJ, et al. Pediatric viral gastroenteritis during eight years of  
1296 study. *J Clin Microbiol* 1983;18:71-8.
- 1297 105. Munoz P, Bouza E, Cuenca-Estrella M, et al. Saccharomyces cerevisiae fungemia: an emerging  
1298 infectious disease. *Clin Infect Dis* 2005;40:1625-34.

- 1299 106. Riquelme AJ, Calvo MA, Guzman AM, et al. *Saccharomyces cerevisiae* fungemia after  
1300 *Saccharomyces boulardii* treatment in immunocompromised patients. *J Clin Gastroenterol* 2003;36:41-3.
- 1301 107. Besselink MG, van Santvoort HC, Buskens E, et al. Probiotic prophylaxis in predicted severe  
1302 acute pancreatitis: a randomised, double-blind, placebo-controlled trial. *Lancet* 2008;371:651-9.
- 1303 108. Johnston BC, Supina AL, Vohra S. Probiotics for pediatric antibiotic-associated diarrhea: a  
1304 meta-analysis of randomized placebo-controlled trials. *CMAJ* 2006;175:377-83.
- 1305 109. Fruhwirth M, Heininger U, Ehlken B, et al. International variation in disease burden of rotavirus  
1306 gastroenteritis in children with community- and nosocomially acquired infection. *Pediatr Infect Dis J*  
1307 2001;20:784-91.
- 1308 110. Givon-Lavi N, Greenberg D, Dagan R. Comparison between two severity scoring scales  
1309 commonly used in the evaluation of rotavirus gastroenteritis in children. *Vaccine* 2008;26:5798-801.
- 1310 111. Ruiz-Palacios GM, Perez-Schael I, Velazquez FR, et al. Safety and efficacy of an attenuated  
1311 vaccine against severe rotavirus gastroenteritis. *The New England journal of medicine* 2006;354:11-22.
- 1312 112. Madhi SA, Cunliffe NA, Steele D, et al. Effect of human rotavirus vaccine on severe diarrhea in  
1313 African infants. *The New England journal of medicine* 2010;362:289-98.
- 1314 113. Ruuska T, Vesikari T. Rotavirus disease in Finnish children: use of numerical scores for clinical  
1315 severity of diarrhoeal episodes. *Scand J Infect Dis* 1990;22:259-67.
- 1316 114. Iturriza Gomara M, Simpson R, Perault AM, et al. Structured surveillance of infantile  
1317 gastroenteritis in East Anglia, UK: incidence of infection with common viral gastroenteric pathogens.  
1318 *Epidemiol Infect* 2008;136:23-33.
- 1319 115. Tapia MD, Armah G, Breiman RF, et al. Secondary efficacy endpoints of the pentavalent  
1320 rotavirus vaccine against gastroenteritis in sub-Saharan Africa. *Vaccine* 2012;30 Suppl 1:A79-85.
- 1321 116. Feikin DR, Laserson KF, Ojwando J, et al. Efficacy of pentavalent rotavirus vaccine in a high  
1322 HIV prevalence population in Kenya. *Vaccine* 2012;30 Suppl 1:A52-60.
- 1323 117. Breiman RF, Zaman K, Armah G, et al. Analyses of health outcomes from the 5 sites  
1324 participating in the Africa and Asia clinical efficacy trials of the oral pentavalent rotavirus vaccine.  
1325 *Vaccine* 2012;30 Suppl 1:A24-9.
- 1326 118. Huppertz HI, Forster J, Heininger U, Roos R, Neumann HU, Hammerschmidt T. The parental  
1327 appraisal of the morbidity of diarrhea in infants and toddlers (PAMODI) survey. *Clin Pediatr (Phila)*  
1328 2008;47:363-71.
- 1329 119. Diez-Domingo J, Patrzalek M, Cantarutti L, et al. The impact of childhood acute rotavirus  
1330 gastroenteritis on the parents' quality of life: prospective observational study in European primary care  
1331 medical practices. *BMC Pediatr* 2012;12:58.
- 1332 120. Mackenzie A, Barnes G, Shann F. Clinical signs of dehydration in children. *Lancet* 1989;2:605-  
1333 7.
- 1334 121. Yee EL, Staat MA, Azimi P, et al. Burden of rotavirus disease among children visiting pediatric  
1335 emergency departments in Cincinnati, Ohio, and Oakland, California, in 1999-2000. *Pediatrics*  
1336 2008;122:971-7.
- 1337 122. Freedman SB, Parkin PC, Willan AR, Schuh S. Rapid versus standard intravenous rehydration in  
1338 paediatric gastroenteritis: pragmatic blinded randomised clinical trial. *BMJ* 2011;343:d6976.
- 1339 123. Vesikari T, Ruuska T, Delem A, Andre FE, Beards GM, Flewett TH. Efficacy of two doses of  
1340 RIT 4237 bovine rotavirus vaccine for prevention of rotavirus diarrhoea. *Acta Paediatr Scand*  
1341 1991;80:173-80.
- 1342 124. Joensuu J, Koskenniemi E, Pang XL, Vesikari T. Randomised placebo-controlled trial of rhesus-  
1343 human reassortant rotavirus vaccine for prevention of severe rotavirus gastroenteritis. *Lancet*  
1344 1997;350:1205-9.
- 1345 125. Cicek C, Karatas T, Altuglu I, Koturoglu G, Kurugol Z, Bilgic A. Comparison of ELISA with  
1346 shell vial cell culture method for the detection of human rotavirus in fecal specimens. *New Microbiol*  
1347 2007;30:113-8.

- 1348 126. Binka FN, Anto FK, Oduro AR, et al. Incidence and risk factors of paediatric rotavirus diarrhoea  
1349 in northern Ghana. *Trop Med Int Health* 2003;8:840-6.
- 1350 127. Guarino A, Canani RB, Spagnuolo MI, Albano F, Di Benedetto L. Oral bacterial therapy reduces  
1351 the duration of symptoms and of viral excretion in children with mild diarrhea. *J Pediatr Gastroenterol*  
1352 *Nutr* 1997;25:516-9.
- 1353 128. Isolauri E, Juntunen M, Rautanen T, Sillanaukee P, Koivula T. A human *Lactobacillus* strain  
1354 (*Lactobacillus casei* sp strain GG) promotes recovery from acute diarrhea in children. *Pediatrics*  
1355 1991;88:90-7.
- 1356 129. Rosenfeldt V, Michaelsen KF, Jakobsen M, et al. Effect of probiotic *Lactobacillus* strains in  
1357 young children hospitalized with acute diarrhea. *Pediatr Infect Dis J* 2002;21:411-6.
- 1358 130. Reid G. Microbiology: Categorize probiotics to speed research. *Nature* 2012;485:446.
- 1359 131. Freedman SB, Powell E, Seshadri R. Predictors of Outcomes in Pediatric Enteritis: A  
1360 Prospective Cohort Study. *Pediatrics* 2009;123:e9-e16.
- 1361 132. Freedman SB, Tung C, Cho D, Rumantir M, Chan KJ. Time-series analysis of ondansetron use  
1362 in pediatric gastroenteritis. *J Pediatr Gastroenterol Nutr* 2012;54:381-6.
- 1363 133. National Center for Complementary and Alternative Medicine. (2008). An introduction to  
1364 probiotics. Available: <http://nccam.nih.gov/health/probiotics/>. Last accessed January 2, 2009.
- 1365 134. Hanson LA, Korotkova M, Lundin S, et al. The transfer of immunity from mother to child.  
1366 *Annals of the New York Academy of Sciences* 2003;987:199-206.
- 1367 135. Walker WA. Role of nutrients and bacterial colonization in the development of intestinal host  
1368 defense. *J Pediatr Gastroenterol Nutr* 2000;30 Suppl 2:S2-7.
- 1369 136. Mazanec MB, Nedrud JG, Kaetzel CS, Lamm ME. A three-tiered view of the role of IgA in  
1370 mucosal defense. *Immunol Today* 1993;14:430-5.
- 1371 137. Bouvet JP, Fischetti VA. Diversity of antibody-mediated immunity at the mucosal barrier. *Infect*  
1372 *Immun* 1999;67:2687-91.
- 1373 138. Guarino A, Lo Vecchio A, Canani RB. Probiotics as prevention and treatment for diarrhea. *Curr*  
1374 *Opin Gastroenterol* 2009;25:18-23.
- 1375 139. Lebeer S, Vanderleyden J, De Keersmaecker SC. Genes and molecules of lactobacilli supporting  
1376 probiotic action. *Microbiol Mol Biol Rev* 2008;72:728-64.
- 1377 140. Suzuki K, Meek B, Doi Y, et al. Aberrant expansion of segmented filamentous bacteria in IgA-  
1378 deficient gut. *Proc Natl Acad Sci U S A* 2004;101:1981-6.
- 1379 141. Chen CC, Kong MS, Lai MW, et al. Probiotics have clinical, microbiologic, and immunologic  
1380 efficacy in acute infectious diarrhea. *Pediatric Infectious Disease Journal* 2010;29:135-8.
- 1381 142. Fedorak RN, Madsen KL. Probiotics and prebiotics in gastrointestinal disorders. *Curr Opin*  
1382 *Gastroenterol* 2004;20:146-55.
- 1383 143. Duggan C, Gannon J, Walker WA. Protective nutrients and functional foods for the  
1384 gastrointestinal tract. *Am J Clin Nutr* 2002;75:789-808.
- 1385 144. Kabeerdoss J, Devi RS, Mary RR, et al. Effect of yoghurt containing *Bifidobacterium lactis*  
1386 *Bb12(R)* on faecal excretion of secretory immunoglobulin A and human beta-defensin 2 in healthy adult  
1387 volunteers. *Nutr J* 2011;10:138.
- 1388 145. Fukushima Y, Kawata Y, Hara H, Terada A, Mitsuoka T. Effect of a probiotic formula on  
1389 intestinal immunoglobulin A production in healthy children. *Int J Food Microbiol* 1998;42:39-44.
- 1390 146. Mullie C, Yazourh A, Thibault H, et al. Increased poliovirus-specific intestinal antibody  
1391 response coincides with promotion of *Bifidobacterium longum-infantis* and *Bifidobacterium breve* in  
1392 infants: a randomized, double-blind, placebo-controlled trial. *Pediatr Res* 2004;56:791-5.
- 1393 147. Osmond MH, Klassen TP, Wells GA, et al. CATCH: a clinical decision rule for the use of  
1394 computed tomography in children with minor head injury. *CMAJ* 2010;182:341-8.

- 1395 148. Campeotto F, Suau A, Kapel N, et al. A fermented formula in pre-term infants: clinical tolerance,  
1396 gut microbiota, down-regulation of faecal calprotectin and up-regulation of faecal secretory IgA. *Br J*  
1397 *Nutr* 2011;1-10.
- 1398 149. Phillips G, Tam CC, Conti S, et al. Community incidence of norovirus-associated infectious  
1399 intestinal disease in England: improved estimates using viral load for norovirus diagnosis. *Am J*  
1400 *Epidemiol* 2010;171:1014-22.
- 1401 150. Barreira DM, Ferreira MS, Fumian TM, et al. Viral load and genotypes of noroviruses in  
1402 symptomatic and asymptomatic children in Southeastern Brazil. *J Clin Virol* 2010;47:60-4.
- 1403 151. Partridge DG, Evans CM, Raza M, Kudesia G, Parsons HK. Lessons from a large norovirus  
1404 outbreak: impact of viral load, patient age and ward design on duration of symptoms and shedding and  
1405 likelihood of transmission. *J Hosp Infect* 2012;81:25-30.
- 1406 152. Furuya D, Kuribayashi K, Hosono Y, et al. Age, viral copy number, and immunosuppressive  
1407 therapy affect the duration of norovirus RNA excretion in inpatients diagnosed with norovirus infection.  
1408 *Jpn J Infect Dis* 2011;64:104-8.
- 1409 153. Aoki Y, Suto A, Mizuta K, Ahiko T, Osaka K, Matsuzaki Y. Duration of norovirus excretion and  
1410 the longitudinal course of viral load in norovirus-infected elderly patients. *J Hosp Infect* 2010;75:42-6.
- 1411 154. Phillips G, Lopman B, Tam CC, Iturriza-Gomara M, Brown D, Gray J. Diagnosing norovirus-  
1412 associated infectious intestinal disease using viral load. *BMC Infect Dis* 2009;9:63.
- 1413 155. Fumian TM, Justino MC, Mascarenhas JD, et al. Quantitative and molecular analysis of  
1414 noroviruses RNA in blood from children hospitalized for acute gastroenteritis in Belem, Brazil. *J Clin*  
1415 *Virol* 2013;58:31-5.
- 1416 156. Takanashi S, Hashira S, Matsunaga T, et al. Detection, genetic characterization, and  
1417 quantification of norovirus RNA from sera of children with gastroenteritis. *J Clin Virol* 2009;44:161-3.
- 1418 157. Kang G, Iturriza-Gomara M, Wheeler JG, et al. Quantitation of group A rotavirus by real-time  
1419 reverse-transcription-polymerase chain reaction: correlation with clinical severity in children in South  
1420 India. *J Med Virol* 2004;73:118-22.
- 1421 158. Deschaght P, Schelstraete P, Van Simaey L, et al. Is the Improvement of CF Patients,  
1422 Hospitalized for Pulmonary Exacerbation, Correlated to a Decrease in Bacterial Load? *PLoS One*  
1423 2013;8:e79010.
- 1424 159. Darton T, Guiver M, Naylor S, et al. Severity of meningococcal disease associated with genomic  
1425 bacterial load. *Clin Infect Dis* 2009;48:587-94.
- 1426 160. Valentine ME, Jackson CR, Vavro C, et al. Evaluation of surrogate markers and clinical  
1427 outcomes in two-year follow-up of eighty-six human immunodeficiency virus-infected pediatric  
1428 patients. *Pediatr Infect Dis J* 1998;17:18-23.
- 1429 161. Liu J, Kibiki G, Maro V, et al. Multiplex reverse transcription PCR Luminex assay for detection  
1430 and quantitation of viral agents of gastroenteritis. *J Clin Virol* 2011;50:308-13.
- 1431 162. Hasing ME, Lee BE, Preiksaitis JK, et al. Emergence of a new norovirus GII.4 variant and  
1432 changes in the historical biennial pattern of norovirus outbreak activity in Alberta, Canada, from 2008 to  
1433 2013. *J Clin Microbiol* 2013;51:2204-11.
- 1434 163. Pang X, Cao M, Zhang M, Lee B. Increased sensitivity for various rotavirus genotypes in stool  
1435 specimens by amending three mismatched nucleotides in the forward primer of a real-time RT-PCR  
1436 assay. *J Virol Methods* 2011;172:85-7.
- 1437 164. Pang XL, Lee BE, Pabbaraju K, et al. Pre-analytical and analytical procedures for the detection  
1438 of enteric viruses and enterovirus in water samples. *J Virol Methods* 2012;184:77-83.
- 1439 165. Pang XL, Lee BE, Tyrrell GJ, Preiksaitis JK. Epidemiology and genotype analysis of sapovirus  
1440 associated with gastroenteritis outbreaks in Alberta, Canada: 2004-2007. *J Infect Dis* 2009;199:547-51.
- 1441 166. Pang XL, Preiksaitis JK, Lee B. Multiplex real time RT-PCR for the detection and quantitation  
1442 of norovirus genogroups I and II in patients with acute gastroenteritis. *J Clin Virol* 2005;33:168-71.

- 1443 167. Pang XL, Preiksaitis JK, Wong S, Li V, Lee BE. Influence of novel norovirus GII.4 variants on  
1444 gastroenteritis outbreak dynamics in Alberta and the Northern Territories, Canada between 2000 and  
1445 2008. *PLoS One* 2010;5:e11599.
- 1446 168. Kageyama T, Kojima S, Shinohara M, et al. Broadly reactive and highly sensitive assay for  
1447 Norwalk-like viruses based on real-time quantitative reverse transcription-PCR. *Journal of clinical*  
1448 *microbiology* 2003;41:1548-57.
- 1449 169. Pang XL, Lee B, Boroumand N, Leblanc B, Preiksaitis JK, Yu Ip CC. Increased detection of  
1450 rotavirus using a real time reverse transcription-polymerase chain reaction (RT-PCR) assay in stool  
1451 specimens from children with diarrhea. *J Med Virol* 2004;72:496-501.
- 1452 170. Oka T, Katayama K, Hansman GS, et al. Detection of human sapovirus by real-time reverse  
1453 transcription-polymerase chain reaction. *Journal of medical virology* 2006;78:1347-53.
- 1454 171. Iturriza-Gomara M, Kang G, Gray J. Rotavirus genotyping: keeping up with an evolving  
1455 population of human rotaviruses. *J Clin Virol* 2004;31:259-65.
- 1456 172. Willan AR, Kowgier ME. Cost-effectiveness analysis of a multinational RCT with a binary  
1457 measure of effectiveness and an interacting covariate. *Health Econ* 2008;17:777-91.
- 1458 173. Manca A, Willan AR. 'Lost in translation': accounting for between-country differences in the  
1459 analysis of multinational cost-effectiveness data. *Pharmacoeconomics* 2006;24:1101-19.
- 1460 174. Willan AR, Goeree R, Pullenayegum EM, McBurney C, Blackhouse G. Economic evaluation of  
1461 rivastigmine in patients with Parkinson's disease dementia. *Pharmacoeconomics* 2006;24:93-106.
- 1462 175. Reed SD, Anstrom KJ, Bakhai A, et al. Conducting economic evaluations alongside  
1463 multinational clinical trials: toward a research consensus. *Am Heart J* 2005;149:434-43.
- 1464 176. Pinto EM, Willan AR, O'Brien BJ. Cost-effectiveness analysis for multinational clinical trials.  
1465 *Stat Med* 2005;24:1965-82.
- 1466 177. Willan AR, Pinto EM, O'Brien BJ, et al. Country specific cost comparisons from multinational  
1467 clinical trials using empirical Bayesian shrinkage estimation: the Canadian ASSENT-3 economic  
1468 analysis. *Health Econ* 2005;14:327-38.
- 1469 178. Fontana M, Zuin G, Pancheri P, Fusco FC, Lambertini A, Berni Canani R. Costs associated with  
1470 outpatient diarrhoea in infants and toddlers: a nationwide study of the Italian Society of Paediatric  
1471 Gastroenterology and Hepatology (SIGEP). *Dig Liver Dis* 2004;36:523-7.
- 1472 179. Le Saux N, Bettinger J, Dery P, et al. The hidden costs and characteristics of childhood rotavirus  
1473 emergency visits in Canada. *Pediatr Infect Dis J* 2012;31:159-63.
- 1474 180. Fleiss J. *Statistical methods for rates and proportions*, 2nd ed. New York: John Wiley & Sons;  
1475 1981.
- 1476 181. Corneli HM, Zorc JJ, Mahajan P, et al. A multicenter, randomized, controlled trial of  
1477 dexamethasone for bronchiolitis. *The New England journal of medicine* 2007;357:331-9.
- 1478 182. Scholtens PA, Alliet P, Raes M, et al. Fecal secretory immunoglobulin A is increased in healthy  
1479 infants who receive a formula with short-chain galacto-oligosaccharides and long-chain fructo-  
1480 oligosaccharides. *J Nutr* 2008;138:1141-7.
- 1481 183. Denno DM, Shaikh N, Stapp JR, et al. Diarrhea etiology in a pediatric emergency department: a  
1482 case control study. *Clin Infect Dis* 2012;55:897-904.
- 1483 184. Denno DM, Stapp JR, Boster DR, et al. Etiology of diarrhea in pediatric outpatient settings.  
1484 *Pediatr Infect Dis J* 2005;24:142-8.
- 1485 185. Shavit I, Brant R, Nijssen-Jordan C, Galbraith R, Johnson DW. A novel imaging technique to  
1486 measure capillary-refill time: improving diagnostic accuracy for dehydration in young children with  
1487 gastroenteritis. *Pediatrics* 2006;118:2402-8.
- 1488 186. Johnson DW, Jacobson S, Edney PC, Hadfield P, Mundy ME, Schuh S. A comparison of  
1489 nebulized budesonide, intramuscular dexamethasone, and placebo for moderately severe croup. *N Engl J*  
1490 *Med* 1998;339:498-503.

- 1491 187. Dendukuri N, Costa V, McGregor M, Brophy JM. Probiotic therapy for the prevention and  
1492 treatment of Clostridium difficile-associated diarrhea: a systematic review. *CMAJ* 2005;173:167-70.
- 1493 188. Salazar-Lindo E, Figueroa-Quintanilla D, Caciano MI, Reto-Valiente V, Chauviere G, Colin P.  
1494 Effectiveness and safety of Lactobacillus LB in the treatment of mild acute diarrhea in children. *J*  
1495 *Pediatr Gastroenterol Nutr* 2007;44:571-6.
- 1496 189. Gravel J, Fitzpatrick E, Gouin S, et al. Performance of the Canadian Triage and Acuity Scale for  
1497 Children: A Multicenter Database Study. *Ann Emerg Med* 2012.
- 1498 190. Gravel J, Gouin S, Goldman RD, et al. The canadian triage and acuity scale for children: a  
1499 prospective multicenter evaluation. *Ann Emerg Med* 2012;60:71-7 e3.
- 1500 191. Plint AC, Johnson DW, Wiebe N, et al. Practice variation among pediatric emergency  
1501 departments in the treatment of bronchiolitis. *Acad Emerg Med* 2004;11:353-60.
- 1502 192. Erickson LJ, De Wals P, Farand L. An analytical framework for immunization programs in  
1503 Canada. *Vaccine* 2005;23:2470-6.
- 1504 193. Vega RM, Avner JR. A prospective study of the usefulness of clinical and laboratory parameters  
1505 for predicting percentage of dehydration in children. *Pediatr Emerg Care* 1997;13:179-82.
- 1506 194. Freedman SB, Cho D, Boutis K, Stephens D, Schuh S. Assessing the palatability of oral  
1507 rehydration solutions in school-aged children: a randomized crossover trial. *Arch Pediatr Adolesc Med*  
1508 2010;164:696-702.
- 1509 195. Freedman SB, Deiratany S, Goldman RD, Benseler S. Development of a Caregiver  
1510 Gastroenteritis Knowledge Questionnaire. *Ambul Pediatr* 2008;8:261-5.
- 1511 196. Kinlin LM, Freedman SB. Evaluation of a clinical dehydration scale in children requiring  
1512 intravenous rehydration. *Pediatrics* 2012;129:e1211-9.
- 1513 197. Freedman SB. Acute infectious pediatric gastroenteritis: beyond oral rehydration therapy. *Expert*  
1514 *Opin Pharmacother* 2007;8:1651-65.
- 1515 198. Roslund G, Hepps TS, McQuillen KK. The role of oral ondansetron in children with vomiting as  
1516 a result of acute gastritis/gastroenteritis who have failed oral rehydration therapy: a randomized  
1517 controlled trial. *Ann Emerg Med* 2008;52:22-9 e6.
- 1518 199. DeCamp LR, Byerley JS, Doshi N, Steiner MJ. Use of antiemetic agents in acute gastroenteritis:  
1519 a systematic review and meta-analysis. *Arch Pediatr Adolesc Med* 2008;162:858-65.
- 1520 200. Ramsook C, Sahagun-Carreon I, Kozinetz CA, Moro-Sutherland D. A randomized clinical trial  
1521 comparing oral ondansetron with placebo in children with vomiting from acute gastroenteritis. *Ann*  
1522 *Emerg Med* 2002;39:397-403.
- 1523 201. Gorelick MH. Bias arising from missing data in predictive models. *Journal of Clinical*  
1524 *Epidemiology* 2006;59:1115-23.
- 1525 202. Gorelick MH, Wagner D, McLellan SL. Development and validation of a self-administered  
1526 questionnaire to measure water exposures in children. *Ambul Pediatr* 2008;8:388-91.
- 1527 203. Gorelick MH, Meurer JR, Walsh-Kelly CM, et al. Emergency department allies: a controlled  
1528 trial of two emergency department-based follow-up interventions to improve asthma outcomes in  
1529 children. *Pediatrics* 2006;117:S127-34.
- 1530 204. Gorelick MH, Yen K. The kappa statistic was representative of empirically observed inter-rater  
1531 agreement for physical findings. *Journal of Clinical Epidemiology* 2006;59:859-61.
- 1532 205. Majowicz SE, McNab WB, Sockett P, et al. Burden and cost of gastroenteritis in a Canadian  
1533 community. *J Food Prot* 2006;69:651-9.
- 1534 206. Alessandrini EA, Alpern ER, Chamberlain JM, Shea JA, Gorelick MH. A new diagnosis  
1535 grouping system for child emergency department visits. *Acad Emerg Med* 2010;17:204-13.
- 1536 207. Gorelick MH, Atabaki SM, Hoyle J, et al. Interobserver agreement in assessment of clinical  
1537 variables in children with blunt head trauma. *Acad Emerg Med* 2008;15:812-8.
- 1538 208. Liu L, Johnson HL, Cousens S, et al. Global, regional, and national causes of child mortality: an  
1539 updated systematic analysis for 2010 with time trends since 2000. *Lancet* 2012;379:2151-61.

- 1540 209. Alessandrini EA, Alpern ER, Chamberlain JM, Shea JA, Holubkov R, Gorelick MH. Developing  
1541 a diagnosis-based severity classification system for use in emergency medical services for children.  
1542 *Acad Emerg Med* 2012;19:70-8.
- 1543 210. Scott S, Hartling L, Grimshaw J, et al. Improving outcomes for ill and injured children in  
1544 emergency departments: protocol for a program in pediatric emergency medicine and knowledge  
1545 translation science. *Implement Sci* 2009;4:60.
- 1546 211. Dayan PS, Osmond M, Kuppermann N, et al. Development of the capacity necessary to perform  
1547 and promote knowledge translation research in emergency medicine. *Acad Emerg Med* 2007;14:978-83.
- 1548 212. Hartling L, Scott-Findlay S, Johnson D, et al. Bridging the gap between clinical research and  
1549 knowledge translation in pediatric emergency medicine. *Acad Emerg Med* 2007;14:968-77.
- 1550 213. Johnson-Henry KC, Hagen KE, Gordonpour M, Tompkins TA, Sherman PM. Surface-layer  
1551 protein extracts from *Lactobacillus helveticus* inhibit enterohaemorrhagic *Escherichia coli* O157:H7  
1552 adhesion to epithelial cells. *Cell Microbiol* 2007;9:356-67.
- 1553 214. Eckermann S, Coory M, Willan AR. Indirect comparison: relative risk fallacies and odds  
1554 solution. *J Clin Epidemiol* 2009;62:1031-6.
- 1555 215. Eckermann S, Willan AR. Globally optimal trial design for local decision making. *Health Econ*  
1556 2009;18:203-16.
- 1557 216. Willan AR, Eckermann S. Optimal clinical trial design using value of information methods with  
1558 imperfect implementation. *Health Econ* 2009.
- 1559 217. Emery CA, Kang J, Shrier I, et al. Risk of injury associated with body checking among youth ice  
1560 hockey players. *JAMA* 2010;303:2265-72.
- 1561 218. Hansen G, Joffe AR, Nettel-Aguirre A, et al. Two-year survival and neurodevelopmental  
1562 outcomes after cardiopulmonary resuscitation in neonatal patients after complex cardiac surgery.  
1563 *Resuscitation* 2011;82:313-8.
- 1564 219. Samuel SM, Foster BJ, Hemmelgarn BR, et al. Incidence and causes of end-stage renal disease  
1565 among Aboriginal children and young adults. *CMAJ* 2012;184:E758-64.
- 1566 220. Emery C, Kang J, Shrier I, et al. Risk of injury associated with bodychecking experience among  
1567 youth hockey players. *CMAJ* 2011;183:1249-56.
- 1568 221. Samuel SM, Foster BJ, Tonelli MA, et al. Dialysis and transplantation among Aboriginal  
1569 children with kidney failure. *CMAJ* 2011;183:E665-72.
- 1570 222. Demirjian A, Finkelstein Y, Nava-Ocampo A, et al. A Randomized Controlled Trial of a  
1571 Vancomycin Loading Dose in Children. *Pediatr Infect Dis J* 2013.
- 1572 223. Huang YF, Liu PY, Chen YY, et al. Three-combination probiotics therapy in children with  
1573 salmonella and rotavirus gastroenteritis. *J Clin Gastroenterol* 2014;48:37-42.
- 1574 224. Freedman SB, Uleryk E, Rumantir M, Finkelstein Y. Ondansetron and the Risk of Cardiac  
1575 Arrhythmias: A Systematic Review and Postmarketing Analysis. *Ann Emerg Med* 2013.
- 1576 225. Finkelstein Y, Moran O, Avitzur Y, et al. Clinical dysentery in hospitalized children. *Infection*  
1577 2002;30:132-5.
- 1578 226. Hoffer V, Finkelstein Y, Balter J, Feinmesser M, Garty BZ. Ganciclovir treatment in Menetrier's  
1579 disease. *Acta Paediatr* 2003;92:983-5.
- 1580 227. Finkelstein Y, Schechter T, Freedman SB. Surgical masks vs N95 respirators for preventing  
1581 influenza. *JAMA* 2010;303:938; author reply -9.
- 1582 228. Finkelstein Y, Hutson JR, Freedman SB, Wax P, Brent J, Toxicology Investigators Consortium  
1583 Case R. Drug-induced seizures in children and adolescents presenting for emergency care: current and  
1584 emerging trends. *Clin Toxicol (Phila)* 2013;51:761-6.
- 1585 229. Freedman SB, Powell EC, Nava-Ocampo AA, Finkelstein Y. Ondansetron dosing in pediatric  
1586 gastroenteritis: a prospective cohort, dose-response study. *Paediatr Drugs* 2010;12:405-10.
- 1587 230. Lee BE, Pang XL, Robinson JL, Bigam D, Monroe SS, Preiksaitis JK. Chronic norovirus and  
1588 adenovirus infection in a solid organ transplant recipient. *Pediatr Infect Dis J* 2008;27:360-2.

- 1589 231. Mattison K, Grudeski E, Auk B, et al. Analytical performance of norovirus real-time RT-PCR  
1590 detection protocols in Canadian laboratories. *J Clin Virol* 2011;50:109-13.
- 1591 232. Pang X, Lee B, Chui L, Preiksaitis JK, Monroe SS. Evaluation and validation of real-time  
1592 reverse transcription-pcr assay using the LightCycler system for detection and quantitation of norovirus.  
1593 *J Clin Microbiol* 2004;42:4679-85.
- 1594 233. Pang XL, Fox JD, Fenton JM, et al. Interlaboratory comparison of cytomegalovirus viral load  
1595 assays. *Am J Transplant* 2009;9:258-68.
- 1596 234. Preiksaitis JK, Pang XL, Fox JD, et al. Interlaboratory comparison of epstein-barr virus viral  
1597 load assays. *Am J Transplant* 2009;9:269-79.
- 1598 235. Chui L, Lee MC, Allen R, Bryks A, Haines L, Boras V. Comparison between ImmunoCard  
1599 STAT!((R)) and real-time PCR as screening tools for both O157:H7 and non-O157 Shiga toxin-  
1600 producing *Escherichia coli* in Southern Alberta, Canada. *Diagn Microbiol Infect Dis* 2013;77:8-13.
- 1601 236. Chui L, Lee MC, Malejczyk K, Lim L, Fok D, Kwong P. Prevalence of shiga toxin-producing  
1602 *Escherichia coli* as detected by enzyme-linked immunoassays and real-time PCR during the summer  
1603 months in northern Alberta, Canada. *J Clin Microbiol* 2011;49:4307-10.
- 1604 237. Couturier MR, Lee B, Zelyas N, Chui L. Shiga-toxigenic *Escherichia coli* detection in stool  
1605 samples screened for viral gastroenteritis in Alberta, Canada. *J Clin Microbiol* 2011;49:574-8.
- 1606 238. Chui L, Couturier MR, Chiu T, et al. Comparison of Shiga toxin-producing *Escherichia coli*  
1607 detection methods using clinical stool samples. *J Mol Diagn* 2010;12:469-75.
- 1608 239. Gilmour MW, Olson AB, Andrysiak AK, Ng LK, Chui L. Sequence-based typing of genetic  
1609 targets encoded outside of the O-antigen gene cluster is indicative of Shiga toxin-producing *Escherichia*  
1610 *coli* serogroup lineages. *J Med Microbiol* 2007;56:620-8.
- 1611 240. Gilmour MW, Chui L, Chiu T, et al. Isolation and detection of Shiga toxin-producing  
1612 *Escherichia coli* in clinical stool samples using conventional and molecular methods. *J Med Microbiol*  
1613 2009;58:905-11.
- 1614 241. Chui L, Chiu T, Kakulphimp J, Tyrrell GJ. A comparison of three real-time PCR assays for the  
1615 confirmation of *Neisseria gonorrhoeae* following detection of *N. gonorrhoeae* using Roche COBAS  
1616 AMPLICOR. *Clin Microbiol Infect* 2008;14:473-9.
- 1617 242. Louie M, Read S, Simor AE, et al. Application of multiplex PCR for detection of non-O157  
1618 verocytotoxin-producing *Escherichia coli* in bloody stools: identification of serogroups O26 and O111. *J*  
1619 *Clin Microbiol* 1998;36:3375-7.
- 1620 243. Pearl DL, Louie M, Chui L, et al. A multi-level approach for investigating socio-economic and  
1621 agricultural risk factors associated with rates of reported cases of *Escherichia coli* O157 in humans in  
1622 Alberta, Canada. *Zoonoses Public Health* 2009;56:455-64.
- 1623 244. Krief WI, Levine DA, Platt SL, et al. Influenza virus infection and the risk of serious bacterial  
1624 infections in young febrile infants. *Pediatrics* 2009;124:30-9.
- 1625 245. Kanegaye JT, Nigrovic LE, Malley R, et al. Diagnostic value of immature neutrophils (bands) in  
1626 the cerebrospinal fluid of children with cerebrospinal fluid pleocytosis. *Pediatrics* 2009;123:e967-71.
- 1627 246. Glaser N, Barnett P, McCaslin I, et al. Risk factors for cerebral edema in children with diabetic  
1628 ketoacidosis. The Pediatric Emergency Medicine Collaborative Research Committee of the American  
1629 Academy of Pediatrics. *The New England journal of medicine* 2001;344:264-9.
- 1630 247. Kuppermann N, Holmes JF, Dayan PS, et al. Identification of children at very low risk of  
1631 clinically-important brain injuries after head trauma: a prospective cohort study. *Lancet* 2009;374:1160-  
1632 70.
- 1633 248. Nigrovic LE, Malley R, Macias CG, et al. Effect of antibiotic pretreatment on cerebrospinal fluid  
1634 profiles of children with bacterial meningitis. *Pediatrics* 2008;122:726-30.
- 1635 249. Moler FW, Meert K, Donaldson AE, et al. In-hospital versus out-of-hospital pediatric cardiac  
1636 arrest: a multicenter cohort study. *Crit Care Med* 2009;37:2259-67.

- 1637 250. Meert KL, Donaldson A, Nadkarni V, et al. Multicenter cohort study of in-hospital pediatric  
1638 cardiac arrest. *Pediatr Crit Care Med* 2009;10:544-53.
- 1639 251. Carcillo J, Holubkov R, Dean JM, et al. Rationale and design of the pediatric critical illness  
1640 stress-induced immune suppression (CRISIS) prevention trial. *JPEN J Parenter Enteral Nutr*  
1641 2009;33:368-74.
- 1642 252. Holubkov R, Dean JM, Berger J, et al. Is "rescue" therapy ethical in randomized controlled  
1643 trials? *Pediatr Crit Care Med* 2009;10:431-8.
- 1644 253. Guthery SL, Dong L, Dean JM, Holubkov R. US estimates of hospitalized pediatric patients with  
1645 ulcerative colitis: implications for multicenter clinical studies. *Inflamm Bowel Dis* 2008;14:1253-8.  
1646
