# Supplementary material for: Variables Associated With Intravenous Rehydration and Hospitalization in Children With Acute Gastroenteritis: A Secondary Analysis of 2 Randomized Clinical Trials
Source: PubMed Central journal article supplement (PMC8056281; doi:10.1001/jamanetworkopen.2021.6433), 2021-04-19
Supplement: jamanetwopen-e216433-s002.pdf [file jamanetwopen-e216433-s002.pdf]

1  
2  
3  
4  
5  
6  
7  
8  
9  
10  
11  
12  
13  
14  
15  
16  
17  
18  
19  
20  
21  
22  
23  
24  
25  
26  
27  
28  
29  
30  
31  
32

Impact of Emergency Department Probiotic  
Treatment of Pediatric Gastroenteritis  
(Probiotics Study)  
PECARN Protocol Number 032

---

Pediatric Emergency Care Applied Research Network  
National Institute for Child Health and Human Development  
(NICHD)

Protocol Version 3.00  
Version Date: February 13, 2017  
Printing Date: February 13, 2017

33  
34  
35  
36  
37  
38  
39  
40  
41  
42  
43  
44  
45  
46  
47  
48  
49  
50  
51  
52  
53  
54  
55  
56  
57  
58

Copyright c 2014. University of Utah School of Medicine on behalf of the Principal Investigator, David Schnadower, M.D. and the Pediatric Emergency Care Applied Research Network (PECARN). All rights reserved.

This protocol is PECARN Protocol Number 032, and has been authored by David Schnadower, M.D., Washington University, for implementation with the PECARN investigators. This study is supported by R01-HD071915 awarded to Washington University (PI:David Schnadower, M.D.) by the Eunice Kennedy Shriver National Institute for Child Health and Human Development (NICHD).

The PECARN research node centers are Washington University, University of Michigan at Ann Arbor, Cincinnati Children's Hospital Medical Center, Columbia University, University of California at Davis Medical Center, Children's Hospital of Pittsburgh, and Children's National Medical Center and are supported by Cooperative Agreements U03-MC00003, U03-MC22684, U03-MC00007, U03-MC00001, U03MC22685, and U03-MC00006 from the Emergency Medical Services for Children (EMSC) Program, Maternal and Child Health Bureau, Health Resources and Services Administration.

This document was prepared by the PECARN EMSC Data Coordinating Center (DCC) located at the University of Utah School of Medicine, Salt Lake City, Utah. The document was written and typeset using L<sup>A</sup>T<sub>E</sub>X 2". The DCC at the University of Utah is supported by Cooperative Agreement U03-MC00008 from the Emergency Medical Services for Children (EMSC) Program, Maternal and Child Health Bureau, Health Resources and Services Administration.

59  
60  
61  
62  
63  
64  
65  
66  
67  
68  
69  
70  
71  
72  
73  
74  
75  
76  
77  
78  
79  
80  
81  
82  
83  
84  
85  
86  
87  
88  
89  
90  
91  
92  
93

PROTOCOL TITLE:

Impact of Emergency Department Probiotic Treatment of Pediatric Gastroenteritis

Short Title: Probiotics Study  
PECARN Protocol Number: 032

Lead Investigator and Author:  
David Schnadower, M.D.  
Washington University

Protocol Version: 3.00  
Version Date: February 13, 2017

I confirm that I have read this protocol, I understand it, and I will conduct the study according to the protocol. I will also work consistently with the ethical principles that have their origin in the Declaration of Helsinki and will adhere to the Ethical and Regulatory Considerations as stated. I confirm that if I or any of my staff are members of the Institutional Review Board, we will abstain from voting on this protocol, its future renewals, and its future amendments.

Principal Investigator Name: \_\_\_\_\_

Principal Investigator Signature: \_\_\_\_\_

Date: \_\_\_\_\_

94  
95  
96  
97

THIS PAGE IS INTENTIONALLY BLANK.

98  
99  
100  
101  
102  
103  
104  
105  
106  
107  
108  
109  
110  
111  
112  
113  
114  
115  
116  
117  
118  
119  
120  
121  
122  
123  
124  
125  
126  
127  
128  
129  
130  
131  
132  
133  
134

# Contents

- 1 Study Summary 9
  - 1.1 Hypotheses . . . . . 9
  - 1.2 Specific Aims . . . . . 9
  - 1.3 Trial Endpoints . . . . . 10
  - 1.4 Subject Eligibility, Accrual and Study Duration . . . . . 10
- 2 Rationale and Background 11
  - 2.1 Rationale for Probiotic E cacy . . . . . 12
  - 2.2 Limitations of Research to Date . . . . . 13
  - 2.3 Validation of the Modified Vesikari Score . . . . . 14
- 3 Study Design and Data Collection 15
  - 3.1 Study Design Overview . . . . . 15
  - 3.2 Participant Screening and Consent . . . . . 15
  - 3.3 Baseline Data Collection . . . . . 16
  - 3.4 Follow Up Data Collection . . . . . 16
- 4 Study Procedures 17
  - 4.1 Randomization (Enrollment) . . . . . 17
  - 4.2 Study Drug Administration . . . . . 17
  - 4.3 Discontinuation of Study Drug . . . . . 19
  - 4.4 Withdrawal from Study . . . . . 20
  - 4.5 Stool Sample Testing . . . . . 20
- 5 Data Analysis 21
  - 5.1 Specific Aim Analyses . . . . . 21
  - 5.2 Secondary Study Outcomes . . . . . 23
  - 5.3 Sample Size Calculations and Statistical Power . . . . . 24
    - 5.3.1 Enrichment Design . . . . . 25
    - 5.3.2 Sub-group Analyses . . . . . 26
  - 5.4 Recruitment Estimates and Attrition . . . . . 26
    - 5.4.1 Recruitment . . . . . 26
    - 5.4.2 Potential for Bias . . . . . 26
    - 5.4.3 Compliance . . . . . 27
    - 5.4.4 Loss to Follow-up . . . . . 27
    - 5.4.5 Compensation . . . . . 27

135  
136  
137  
138  
139  
140  
141  
142  
143  
144  
145  
146  
147  
148  
149  
150  
151  
152  
153  
154  
155  
156  
157  
158  
159  
160

- Data Management . . . . . 27
- 6 6.1 Clinical Sites . . . . . 27
- 6.2 PECARN Data Coordinating Center (Utah) . . . . . 28
- 6.3 Data Confidentiality . . . . . 29
- 6.4 Data Quality Management and Monitoring . . . . . 29
- 6.5 Record Access . . . . . 30
- 7 Protection of Human Subjects . . . . . 30
- 7.1 Institutional Review Board (IRB) Approval . . . . . 30
- 7.2 Informed Consent . . . . . 30
- 7.3 Potential Risks . . . . . 30
- 7.4 Protections Against Potential Risks . . . . . 31
- 7.5 Potential Benefits . . . . . 31
- 8 Data and Safety Monitoring Plan . . . . . 32
- 8.1 Data Safety Monitoring Board (DSMB) . . . . . 32
- 8.2 Frequency of Interim Analysis: . . . . . 33
- 8.3 Adverse Event Reporting . . . . . 33
- 8.3.1 Definitions, Relatedness, Severity and Expectedness . . . . . 33
- 8.3.2 Time Period for Adverse Events . . . . . 35
- 8.3.3 Data Collection Procedures for Adverse Events . . . . . 35
- 8.3.4 Unanticipated Problems (UP) . . . . . 36
- 8.3.5 Monitoring Serious Adverse Events . . . . . 36
- 8.3.6 Follow-up of Serious, Unexpected and Related Adverse Events . . . . . 37
- 9 Study Training and Monitoring . . . . . 37
- 9.1 Study Training . . . . . 37
- 9.2 Study Monitoring . . . . . 38
- 9.2.1 Site Monitoring Plan . . . . . 38
- 9.2.2 Clinical Site Monitoring . . . . . 38
- 9.2.3 Remote Monitoring . . . . . 39
- 9.2.4 Pharmacy Monitoring . . . . . 39
- 10 Regulatory Issues . . . . . 39
- 10.1 Food and Drug Administration . . . . . 39
- 10.2 Health Insurance Portability and Accountability Act . . . . . 39
- 10.3 Inclusion of Women and Minorities . . . . . 40
- 10.4 ClinicalTrials.gov Requirements . . . . . 40
- 10.5 Retention of Records . . . . . 40

161  
162  
163  
164  
165  
166  
167  
168

**Bibliography**

40

**List of Tables**

|   |                                   |    |
|---|-----------------------------------|----|
| 1 | Modified Vesikari Score . . . . . | 15 |
| 2 | Power Analysis . . . . .          | 25 |

## Abstract

Practice guidelines do not endorse routine use of probiotics in pediatric acute gastroenteritis. However, probiotic manufacturers aggressively purvey probiotics using health claims that have not been supported by rigorous research, and the world-wide market for probiotic products is equivalent to \$32.6 billion per year. The Food and Drug Administration and the European Food Safety Authority remain concerned about probiotic value and safety.<sup>1-3</sup> Some institutions now recommend the routine use of probiotics based on potentially flawed or limited evidence,<sup>4</sup> and parents of patients with acute gastroenteritis often administer probiotics to their children without guidance from medical professionals.<sup>5</sup> Since the use of probiotics is increasing without adequate evidence to support its use in the United States, the study described in this protocol was designed and successfully submitted to the National Institute for Child Health and Human Development (NICHD) for funding.

The overall objective of this randomized, placebo-controlled, double-blind study is to determine if probiotic administration reduces the severity of acute gastroenteritis episodes in children aged 3 to 48 months. The probiotic agent that will be used in this trial is *Lactobacillus rhamnosus* GG, ATCC 53103 (LGG).

Participants will be randomized to receive a five-day course of probiotic or placebo. The trial is anticipated to enroll 970 children, age 3-48 months, treated in participating emergency departments for acute gastroenteritis. We define acute gastroenteritis as the presence of three or more watery stools in a 24-hour period. Children with underlying illness that pose potential increased risk from probiotic therapy (e.g. indwelling vascular access line, structural heart disease, immunosuppressive therapy or known immunodeficiency, chronic gastrointestinal disease such as inflammatory bowel disease, or household contact with immunodeficiency or immunosuppressive therapy) will be excluded. The age range of 3-48 months was selected because this age group has the highest incidence of acute gastroenteritis and the greatest morbidity. Subjects will be recruited at the time of an emergency department visit. All eligible subjects who present for treatment when study personnel are available will be approached for participation. Those agreeing to participate will be randomized, using block randomization stratified by study site, to treatment groups. The study will be conducted at multiple sites within the Pediatric Emergency Care Applied Research Network (PECARN). We will also collect and freeze pre- and post-treatment bulk stool specimens at the lead study

214 site to assess the mechanism of action of the specific probiotic agent, Lactobacillus  
215 rhamnosus GG, ATCC 53103 (LGG).

216  
217  
218

## 219 1 Study Summary

220

221 This randomized, double-blind, placebo-controlled trial will quantify the benefits and  
222 potential side effects associated with probiotic administration in ambulatory children  
223 presenting to the emergency department with acute gastroenteritis. This will provide  
224 the first definitive evidence in the United States for, or against, using probiotic therapy  
225 for this condition. This study will use the most commonly employed probiotic agent  
226 (*Lactobacillus rhamnosus* GG, ATCC 53103 (LGG)) approved for use in the United  
227 States. The results of this multicenter study will guide the standard of care: if probiotic  
228 administration is associated with benefit, it offers an inexpensive, safe and easy way to  
229 administer treatment to reduce morbidity from acute gastroenteritis. If the trial does  
230 not demonstrate probiotic efficacy, healthcare, caregiver and societal resources may be  
231 refocused on alternative therapeutic interventions.

232

233

234

### 1.1

## 235 Hypotheses

236

237 The hypotheses of this study are:

238

239 1. In children with acute gastroenteritis, probiotic administration in the emergency  
240 department will be associated with a clinically-important decrease in the proportion  
241 of children suffering from moderate-severe disease, defined by a validated Modified  
242 Vesikari Score  $\geq 9$ , compared to placebo.

243

244 2. In children with acute gastroenteritis, probiotic administration will not be associated  
245 with serious adverse events, and will have a similar rate of side effects (e.g. bloating,  
246 fever) as compared to placebo-treated children.

247

248

## 249 1.2 Specific

### 250 Aims

251

252 This project has the following Specific Aims:

253

254 Specific Aim 1. Determine the clinical effectiveness of probiotic administration to re-  
255 duce morbidity in children presenting to the emergency department with acute  
256 gastroenteritis.

257

258 Specific Aim 2. Determine the safety and side effect profiles of Lactobacillus  
259 rhamnosus GG, ATCC 53103 (LGG) in children presenting to the emergency  
260 department with acute gastroenteritis.

261  
262  
263  
264  
265  
266  
267  
268  
269  
270  
271  
272  
273  
274  
275  
276  
277  
278  
279  
280  
281  
282  
283  
284  
285  
286  
287  
288  
289  
290  
291  
292  
293  
294  
295  
296  
297  
298  
299  
300  
301  
302  
303  
304  
305  
306

### 1.3 Trial Endpoints

#### Primary Endpoints

- The primary efficacy endpoint of this study is the presence of moderate-severe acute gastroenteritis, as defined by a total post-enrollment Modified Vesikari Score  $\geq$  9 during the 2-week follow-up period.
- The primary safety endpoint of this study is the occurrence of invasive disease (including meningitis and bacteremia) from *Lactobacillus rhamnosus*.

#### Secondary Endpoints

1. Diarrhea duration: Time from randomization until the appearance of the last watery stool as reported during daily surveys.
2. Vomiting duration: Time from randomization until the last vomiting episode as reported during daily surveys. Vomiting duration is only evaluated in children who vomited  $\geq$  3 times during the 24 hours prior to the emergency department visit.
3. Return visits: Return visits for unscheduled care to a healthcare provider related to vomiting, diarrhea, dehydration, fever, or fluid refusal, within 2 weeks of the index visit. Scheduled visits (e.g. reassessment, vaccinations, unrelated issues) will not be included.
4. Missed daycare: Days of daycare missed by subjects who attend daycare.
5. Missed work: Days of work missed by caregivers who work outside of the home.
6. Household transmission rate: A household census will be obtained at the time of enrollment, and information about household contacts symptoms will be obtained during daily surveys to determine household transmission rate.
7. Side Effects: Occurrence of side effects such as weakness, bloating, gas, intestinal rumbling, diarrhea, blood in stool, abdominal pain, abdominal cramps, nausea, vomiting, loss of appetite, heartburn, constipation, skin rash, fever, nasal congestion, sore throat, cough, headache, muscle aches, chills, and diaper rash.

### 1.4 Subject Eligibility, Accrual and Study Duration

Eligible participants will be identified by on-site study staff. Inclusion criteria are:

307  
308  
309  
310  
311  
312  
313  
314  
315  
316  
317  
318  
319  
320  
321  
322  
323  
324  
325  
326  
327  
328  
329  
330  
331  
332  
333  
334  
335  
336  
337  
338  
339  
340  
341  
342  
343  
344  
345  
346  
347

1. Age 3-48 months (have not yet reached their fourth birthday); AND
2. Presence of 3 or more watery stools within 24 hours of screening; AND
3. Duration of vomiting or diarrhea less than 7 days; AND
4. Symptoms consistent with acute intestinal infectious process.

We will exclude subjects with any of the following:

1. Presence of an indwelling vascular access line; OR
2. Presence of structural heart disease excluding non-pathological heart murmurs; OR
3. Receiving immunosuppressive therapy or history of immunodeficiency; OR
4. Hematochezia in the preceding 48 hours; OR
5. Chronic gastrointestinal problems (e.g. short gut syndrome, inflammatory bowel disease); OR
6. Patients with known pancreatitis; OR
7. History of abdominal surgery; OR
8. Critically ill patients; OR
9. Family member with an indwelling vascular access line, or on immunosuppressive therapy, or with a known immunodeficiency; OR
10. Bilious emesis; OR
11. Probiotic use (supplement) in the preceding 2 weeks; OR
12. Oral or intravenous steroid use in the preceding six months; OR
13. Previously enrolled in this trial; OR
14. Allergy to lactobacillus or Microcrystalline Cellulose (MCC); OR
15. Allergy to erythromycin, clindamycin, AND -lactam antibiotics (all); OR
16. Not available for daily follow-up while symptomatic; OR
17. Parent/guardian not speaking English or Spanish; OR
18. Under 6 months old AND premature (<37 weeks).

The trial is anticipated to enroll 970 subjects over four years, which will include four acute gastroenteritis seasons. An interim safety analysis will be prepared for Data Safety Monitoring Board (DSMB) review after the first 80 subjects (half of whom will be under

1 year of age) have been followed for 1 month. At the time of this review, the DSMB may alter the subsequent sample size based on overall event rates.

## 2 Rationale and Background

348 Acute gastroenteritis is a leading cause of malnutrition and death worldwide and affects  
349 millions of children in the United States each year.<sup>6, 7</sup> Acute gastroenteritis exerts  
350 high

351  
352  
353  
354  
355  
356  
357  
358  
359  
360  
361  
362  
363  
364  
365  
366  
367  
368  
369  
370  
371  
372  
373  
374  
375  
376  
377  
378  
379  
380  
381  
382  
383  
384  
385  
386  
387  
388  
389  
390

impact burdens on children and their families: each episode causes on average 6-8 days of diarrhea, 2-4 days of vomiting, and 2-4 days of fever.<sup>8-11</sup> In two prospective studies conducted in 11 Canadian and 5 United States pediatric emergency departments, 433/683 (63%) children 3-48 months of age with acute gastroenteritis had moderate to-severe symptoms at presentation, resulting in substantial daycare and parental work absenteeism.<sup>12, 13</sup> The economic burden associated with such cases is considerable.<sup>14</sup> Unfortunately, current treatment options are limited to rehydration, symptomatic management and supportive care, prevention of severe dehydration and secondary infection control.<sup>15-17</sup>

Probiotic agents represent a novel approach to management of pediatric acute gastroenteritis. Probiotics are viable microbes that are generally considered to be safe and are relatively inexpensive, easily administered, and hypothesized to modulate disease processes.<sup>18</sup> They may also reduce symptoms (i.e. diarrhea, vomiting, fever)<sup>19-22</sup> and morbidity, thereby diminishing acute gastroenteritis-associated resource consumption (e.g. physician visits, hospitalization) and societal costs. Numerous studies report promising results in children with acute gastroenteritis treated with probiotics, but these studies have been inadequate to change clinical practice, because of flaws in methodology including small sample sizes, lack of probiotic quality control, and outcomes that are of minimal relevance to patients and their families.<sup>19</sup> Remarkably, few studies of probiotics have evaluated outpatients, a group representing >90% of acute gastroenteritis episodes in the United States.<sup>23, 24</sup> Moreover, only a single emergency department study of probiotic efficacy in acute gastroenteritis has been reported.<sup>20</sup>

To date, practice guidelines do not endorse routine use of probiotics in pediatric acute gastroenteritis.<sup>5, 19, 25-27</sup> However, current trends provide the motivations for the study described in this protocol. First, probiotic manufacturers aggressively purvey probiotics using health claims that have not been supported by rigorous research,<sup>28-31</sup> and the world-wide market for probiotic products is growing rapidly (projected growth 2009-2014 12.6%, now equivalent to \$32.6 billion per year).<sup>32</sup> Second, the United States Food and Drug Administration and the European Food Safety Authority remain concerned about probiotic value and safety.<sup>1-3</sup> Third, some institutions now recommend the routine use of probiotics based on potentially flawed or limited evidence.<sup>4</sup> Fourth, parents of patients with acute gastroenteritis often administer probiotics to their children without guidance from medical professionals.<sup>5</sup>

## 2.1 Rationale for Probiotic Efficacy

391 Probiotics, defined as viable microbial preparations with beneficial effects on the health  
392 of the host,<sup>33</sup> are regarded as safe, and are generally affordable and convenient (i.e.,  
393 as over-the-counter food supplements). Probiotics, and *Lactobacillus rhamnosus* GG,  
394 ATCC

395  
396  
397  
398  
399  
400  
401  
402  
403  
404  
405  
406  
407

53103 (LGG) in particular, promote colonization resistance and modulate immune responses in the host, and can be directly antimicrobial. Over 100 studies have studied how probiotics can improve immune function in humans.<sup>34</sup> At the mucosal surface, probiotics:

- compete with pathogenic bacteria for nutrients and adhesion binding sites,<sup>35-38</sup>
- produce antimicrobial substances,<sup>37, 39, 40</sup>
- provide nutrients to colonocytes,<sup>41</sup>
- alter epithelial gene expression,<sup>42</sup> and
- reduce intestinal permeability.<sup>43</sup>

408  
409  
410  
411

Additional mechanisms of action include enhancing phagocyte<sup>44</sup> and natural killer cell activity,<sup>45</sup> and increasing fecal,<sup>46</sup> salivary,<sup>47</sup> and systemic<sup>48</sup> IgA levels.

412  
413  
414  
415  
416  
417  
418  
419  
420  
421  
422  
423

Preliminary probiotic studies in humans, including over 56 trials in children with gastroenteritis (17 of which used some form of *Lactobacillus rhamnosus* GG, ATCC 53103 (LGG) , the agent employed in this trial) suggest that probiotics may improve the course of acute gastroenteritis. Meta-analyses<sup>19, 21, 49-51</sup> report reduced mean duration of diarrhea (by 25 hours), reduced proportion of diarrhea lasting four days (risk ratio 0.41), and reduced stool frequency on Day 2 (mean difference 0.8).<sup>19</sup> This has prompted some physicians and institutions to recommend probiotics in children with acute gastroenteritis. Careful examination of the data, however, shows significant methodological flaws in these studies. For these reasons, experts and agencies have continued to recommend large, unbiased, well designed definitive trials to inform practice.<sup>19, 26</sup>

424  
425  
426

## 2.2 Limitations of Research to Date

427  
428  
429  
430  
431  
432  
433  
434  
435

Most trials of probiotics for acute gastroenteritis have been methodologically flawed.<sup>19</sup> Published studies have used small sample sizes and non-standardized treatment regimens, probiotic preparations with variable production quality and non-verified colony counts. Outcomes have been focused almost exclusively on diarrhea duration, and use inconsistent (or unreported) definitions,<sup>19, 52</sup> without considering the more global (and relevant) assessment of the illness (e.g. fever, vomiting, repeat emergency department visits, hospitalization). Because the outcomes sought are heterogeneous, and/or not validated, and/or of minimal importance to participants,<sup>53</sup> and have not addressed clinical and socioeconomic efficacy,<sup>49, 50</sup> the value of the existing data has been questioned.<sup>54</sup>

436 Moreover, few studies address side effects and adverse events systematically.<sup>1-3</sup>

437

438 Although >90% of children with acute gastroenteritis are treated as outpatients,<sup>23</sup>

hospitalized children have been the main focus of most research in this area. Extrapolation to outpatients is problematic because hospitalized children are more likely to have rotavirus infections,<sup>55</sup> severe disease, and to benefit from probiotics.<sup>21, 52, 56</sup> Emergency department patients are ideal for outpatient probiotic trials, as their acute gastroenteritis disease severity represents the entire spectrum in a normal distribution,<sup>13</sup> offering distinct advantages over primary care populations. Emergency department patients are at risk for more severe disease, there is a greater potential for benefit because of the disease acuity and the large sample size, and disease spectrum will enable identification of subgroups most likely to benefit. Emergency departments are also a high venue of presentation for acute gastroenteritis, enabling uniform trial design and compliance compared to non-emergency department ambulatory settings.<sup>24, 57-59</sup> Only one emergency department study has been conducted previously, but the study was underpowered and did not explore side effects.<sup>20</sup>

### 2.3 Validation of the Modified Vesikari Score

The Vesikari Score, a composite measure of seven items first described in 1990,<sup>60</sup> has been used in many clinical trials for treating acute gastroenteritis, particularly those evaluating rotavirus vaccines in infants, and in large international epidemiological studies.<sup>8, 61-65</sup> The score incorporates features of acute gastroenteritis that are important to parents, children and physicians, including

- diarrhea duration
- diarrhea frequency,
- vomiting duration,
- vomiting frequency,
- maximum daily temperature,
- medical interventions required, and
- degree of dehydration.

In outpatient studies, the degree of dehydration, measured as weight loss, is problematic because it requires in-person re-evaluations, can vary based on recent voiding, defecation, and liquid intake, and also might reflect inadequate caloric intake or catabolism during acute illness. In fact, the assessment of dehydration using signs or scales designed based on the use of post-illness weight as a gold standard has been questioned.<sup>66</sup> Because of these limitations, modifications to the original Vesikari score have been tested.<sup>67, 68</sup>

481 The modification replaces percent dehydration with the need for an unscheduled future  
482 healthcare visit within the two week follow-up period (Table 1 on the facing page). This

483  
484  
485

| Points                            | 0                             | 1           | 2                  | 3                    |
|-----------------------------------|-------------------------------|-------------|--------------------|----------------------|
| Diarrhea duration                 | 0                             | 1-96 hrs    | 97-120 hrs         | 121 hours            |
| Max # of diarrheal stools/24 hrs  | 0                             | 1-3         | 4-5                | 6                    |
| Vomiting duration                 | 0                             | 1-24 hrs    | 25-48 hrs          | 49 hours             |
| Max # of vomiting episodes/24 hrs | 0                             | 1           | 2-4                | 5                    |
| Max recorded fever                | <input type="checkbox"/> 37 C | 37.1-38.4 C | 38.5-38.9 C        | 39 C                 |
| Unscheduled healthcare visit      | 0                             | –           | Primary Care       | Emergency Department |
| Treatment                         | None                          | Rehydration | Hospital Admission | –                    |

486  
487  
488  
489  
490  
491  
492  
493  
494  
495

Table 1: Modified Vesikari Score

modification is supported by evidence that the demand for professional medical care correlates with disease severity.<sup>67</sup> The Modified Vesikari Score has been validated in two multicenter studies<sup>12, 13</sup> conducted during the planning of the current trial described in this protocol.

### 3 Study Design and Data Collection

496  
497  
498

#### 3.1 Study Design

499  
500

##### Overview

501  
502  
503  
504  
505  
506  
507  
508

This is a double-blind randomized placebo controlled trial of probiotic therapy for acute gastroenteritis. Children 3 months of age to 48 months of age who present to a participating emergency department with acute gastroenteritis will be assessed for eligibility. Children for whom parents provide permission to participate in the trial will be randomized to receive probiotic therapy (*Lactobacillus rhamnosus* GG, ATCC 53103 (LGG)) or placebo. The trial will be analyzed as an intention-to-treat study.

509  
510  
511

#### 3.2 Participant Screening and Consent

512  
513  
514

Potentially eligible patients will be identified and screened for eligibility. The treating physician or other study personnel will discuss the details of the study with the patient’s caregivers to explain the study and obtain parental permission.

515

516

517

518

For patients who are actively screened in real time and meet all inclusion criteria, data will be recorded that include yes/no answers to each of the exclusion criteria. If a patient is ineligible at this point, no further data will be recorded, and the patient's parents will

519  
520  
521  
522 not be approached for participation in the study. If a patient is eligible, the parents will  
523 be approached to request permission for their child to participate in the study. If parents  
524 are not approached for permission, the reason the parents were not approached will be  
525 recorded. If the parents decline permission to participate, the reason for refusal will be  
526 documented (if offered by the parent). For all eligible patients who are not randomized,  
527 study personnel will record whether the patient was prescribed probiotics. The recorded  
528 exclusion criteria, reasons for declining permission, and off-study probiotic use will enable  
529 the investigators to assess barriers to trial enrollment and identify potential biases in the  
530 study.  
531  
532

### 533 3.3 Baseline Data 534 Collection

535  
536 Trained study staff at each site will collect baseline demographic information (e.g. birth-  
537 date, gender, race, ethnicity) and relevant clinical variables, record the data on worksheets,  
538 and enter the data into the electronic data capture system provided by the Data Coordi-  
539 nating Center. Baseline clinical dehydration scale<sup>69</sup> and disease severity scores (Modified  
540 Vesikari Score)<sup>13</sup> will be assigned to enable baseline comparisons between treatment arms.  
541  
542

### 543 3.4 Follow Up Data 544 Collection

545  
546 Successful follow up will be maximized by obtaining multiple phone numbers for families  
547 and emergency contacts, scheduling calls and sending phone text reminders, allowing for  
548 electronic completion and centralizing all follow-up procedures at the lead institution  
549 (Washington University). Trained, experienced study staff will contact the family daily  
550 (including weekends) until both the diarrhea and vomiting have resolved and the treatment  
551 has been completed on day 5. Additional contact will be made on day 14 for outcome  
552 assessment, and months 1, 3, 6, 9 and 12 for long term safety outcomes. Study staff  
553 will use a standardized data collection form, and will inquire about ongoing symptoms,  
554 medical evaluations, treatments, child care, work absenteeism, and side effects. Detailed  
555 questioning will follow positive responses. A study diary will be provided to caregivers to  
556 use as a note-taking tool. Caregivers may also be provided an option of completing the  
557 follow-up collection electronically. Patient compliance with study drug administration  
558 will be assessed on day 5. To maximize compliance, caregivers will be reminded of the  
559 importance and method of administering the study drug. On day 14, the study site staff  
560 (not the central staff conducting the follow up) will perform a chart review for final data

561 collection and identification of recorded adverse events during the 14 day study period.  
562 Adverse event reporting is described in detail in Section 8.3 on page 33.

563  
564  
565  
566  
567  
568  
569  
570  
571  
572  
573  
574  
575

Every effort will be made complete daily follow-up on the day necessary. However, if one or two days of follow-up contact is missed, data for those missed days may be collected on the next contact, if the caregiver used the home diaries or can recall the information. If all contact is missed but then the parent is contacted on day 14, follow-up data for the daily calls will be collected only if the parent diaries were used. For day 5 and 14, contact may be made within  $\pm 3$  days. For month 1, 3, 6, 9, and 12 follow-up, contact may be made within  $\pm 2$  weeks.

576  
577  
578

## 4 Study Procedures

579

### 4.1 Randomization (Enrollment)

580  
581

582  
583  
584  
585  
586  
587  
588  
589  
590  
591  
592  
593  
594

Randomization will be accomplished through the use of an online randomization service. Subjects will be randomized to receive either probiotic (Lactobacillus rhamnosus GG, ATCC 53103 (LGG)) or placebo. Equal allocation randomization tables will be provided by the Data Coordinating Center to the central research pharmacy. The central research pharmacy will prepare consecutively numbered study kits according to the randomization schedule. Study kits will be sent to the clinical sites. Randomization tables will be created at the Data Coordinating Center using permuted-block randomization stratified by clinical site and duration of symptoms. This will ensure that variations (e.g. site specific practice patterns, gastrointestinal patterns) are comparably distributed across treatment arms. The randomization number will be recorded in the database.

595

### 4.2 Study Drug Administration

596  
597

598  
599

#### Study Drug Description

600  
601  
602  
603  
604

Lactobacillus rhamnosus GG, ATCC 53103 (LGG) is supplied in a gelatin capsule containing  $10^{10}$  colony forming units of Lactobacillus rhamnosus (75 mg). The capsule also contains 250 mg of microcrystalline cellulose (MCC - purified partially depolymerized cellulose), an inert ingredient. Placebo capsules contain only MCC (to a total of 325 mg). Each capsule is wrapped in double foil to protect it against harmful light, air, and

605 moisture. Blister packs are labeled with the lot number. The probiotic and placebo  
606 capsules have active Drug Master Files at the Food and Drug Administration (BB-MF 2  
607 #13668 and MF2 # 13646).

608  
609  
610  
611  
612  
613  
614  
615  
616  
617  
618  
619  
620  
621  
622  
623  
624  
625  
626  
627

### Initial Study Drug Administration

Clinical staff in the emergency department will administer the first dose of study drug by sprinkling the capsule's contents into 20-30 mL of room temperature non-carbonated liquid. Capsule contents may also be sprinkled into 1 tablespoon of applesauce as an alternative to liquid. Oral fluid therapy will be encouraged according to sites' existing clinical guidelines.<sup>26</sup> At discharge, parents will also be provided with clinical instructions concerning what and how much fluid to drink, criteria for returning to the emergency department or seeing their physician, and other standardized discharge instructions for acute gastroenteritis. Study research coordinators will provide the parents with instructions concerning study drug administration at home, completion of study forms, and a letter for their pediatrician that explains the study. The importance of administering all doses dispensed and the need to communicate with the study team on a daily basis until symptoms resolve will be stressed.

### Home Study Drug Administration

All patients will consume one capsule twice a day for 5 days (total of 9 home doses). Patients will receive the medication mixed with 20-30 mL of a room temperature non-carbonated liquid (or 1 tablespoon of applesauce as an alternative to liquid) and ingested immediately to optimize probiotic viability. One extra dose/day will be provided (i.e. kits will contain 5 extra doses total of 15 capsules) to account for vomiting or wastage. The dose may be repeated once if vomiting occurs within 15 minutes of administration; this rarely happens more than once.<sup>70</sup> Oral fluid therapy will be encouraged according to established guidelines.<sup>26</sup>

### Hospital Study Drug Administration

We estimate that only a small proportion (<5%) of enrolled subjects will be hospitalized. If that does occur, subjects will continue on the study protocol as described for home study drug administration, as done in previous studies.<sup>71</sup> Future unscheduled hospitalization at a non-study hospital site is even less common: none of the 274 patients enrolled in our pilot study were admitted to a different institution after evaluation.<sup>12</sup> To minimize the impact that such an event could have on this trial, caregivers will be provided with a letter that they will be instructed to share with their pediatrician and with the admitting

650 physician. The letter will describe the study, the care-plan, and it will include site  
651 investigator contact information and the importance of adhering to the study protocol.

652  
653  
654

### 655 4.3 Discontinuation of Study 656 Drug

657  
658 Study drugs are sometimes discontinued because of intolerance or perception of a clinical  
659 adverse event from study drug administration. If any clinical abnormality, laboratory ab-  
660 normality, intercurrent illness, new immunosuppressive therapy, or other condition occurs  
661 such that continued administration of study drug would not be in the best interest of the  
662 subject in the opinion of the investigator, study drug administration may be discontinued.  
663 When this occurs, regardless of the reason, the subject remains in the intention-to-treat  
664 population, all data collection should proceed, and long term follow up for adverse events  
665 is carried out. Discontinuation of study drug will be documented and will be reported in  
666 the closed session of the next scheduled Data Safety Monitoring Board meeting. Clinical  
667 sta<sup>d</sup> and parents should not report the early discontinuation of study drug to research  
668 sta<sup>d</sup> who are conducting follow up data collection. The Principal Investigator should not  
669 be contacted by the site investigator, as intentional discontinuation of study drug implies  
670 a safety outcome, and the Principal Investigator should be blind to all study outcomes.  
671 Discontinuation of study drug is not a withdrawal from the study.

672

673 If study subjects are hospitalized after discharge to home from the emergency de-  
674 partment, this is not a reason for discontinuation of study drug. We estimate that only  
675 a small proportion (<5%) of enrolled children will be hospitalized after discharge to  
676 home from the emergency department. If that does occur, subjects should continue  
677 on the study protocol unless they have developed an exclusion criterion for study drug  
678 administration (e.g. critical illness, immunosuppression, etc.). To facilitate continuation  
679 of study drug administration during hospitalization, parents are provided with a letter for  
680 their pediatrician. The letter will describe the study, the care-plan, and it will include site  
681 investigator contact information and the importance of adhering to the study protocol.  
682 The parents will be instructed to share this letter with their pediatrician and with the  
683 admitting physician.

684

685 Breaking the blinding of the study drug should not be necessary, but an unblinding  
686 procedure will be available. This will require contacting the Medical Monitor at the  
687 Data Coordinating Center. However, unblinding is almost never necessary. The primary  
688 anticipated reason for a clinician requesting unblinding is the suspected occurrence of  
689 invasive infection (bacteremia/septicemia or meningitis), and the natural desire to know  
690 if the subject was receiving active *Lactobacillus rhamnosus* GG, ATCC 53103 (LGG).  
691 The initial recommendation from the Medical Monitor will always be that the clinician  
692 should assume that the subject was receiving active drug, and include *Lactobacillus*

693 rhamnosus in the differential diagnosis (and treatment coverage) of the suspected invasive  
694 infection. Lactobacillus rhamnosus is readily susceptible to common antibiotics, and the

695  
696  
697  
698 differential diagnosis of subsequent invasive infection would include organisms other than  
699 *Lactobacillus rhamnosus*. Thus, future clinical treatment should not be dependent on  
700 unblinding information.  
701

702  
703 If the situation requires unblinding, the Medical Monitor and Data Coordinating  
704 Center staff will provide the information, and the unblinding will be documented. Study  
705 drug will be discontinued, but the subject should not be withdrawn from the study! All study  
706 procedures (except study drug administration) should be continued, as the subsequent  
707 clinical course of the subject is critical to the science of the trial. All unblinding events  
708 will be reported in the closed session of the next scheduled Data Safety Monitoring Board  
709 meeting. Clinical staff and parents should not report the unblinding to research  
710 staff who are conducting follow up data collection. The Principal Investigator should  
711 not be contacted by the site investigator, as intentional unblinding of a subject implies a  
712 safety outcome, and the Principal Investigator should be blind to all study outcomes.  
713  
714

#### 715 4.4 Withdrawal from 716 Study

717  
718 Parents may completely withdraw their child from participation in this study at any  
719 time, including discontinuation of data collection. However, withdrawal from study is a  
720 completely different issue from discontinuation of study drug, and true withdrawal from  
721 study is an exceedingly rare event. If parents demand withdrawal of their child from the  
722 study, research staff will attempt to obtain adverse event information as required by the  
723 Food and Drug Administration (all adverse events for 30 days, monthly follow up for long  
724 term adverse events).  
725  
726

#### 727 4.5 Stool Sample 728 Testing

729  
730 Stool sample swabs will be collected from all study subjects, if possible, for polymerase  
731 chain reaction (PCR) analysis. Once obtained, swabs will be frozen and sent to a central  
732 laboratory for analysis. A storage and shipping protocol will be provided in the study  
733 manual of operations. Samples will be tested with multiplex PCR. Sites will also be asked  
734 to collect an optional bulk sample of stool if one is available at the time of enrollment (i.e.  
735 fresh diaper, etc). This will be used for future studies.  
736  
737

738 In addition, at the lead site, Washington University, study research personnel will  
739 collect and freeze subjects' bulk stool specimens in the acute phase (within 24 hours of  
740 presentation) and 14 days after presentation using a previously tested bulk stool specimen  
741 collection protocol. Specimens may be collected in the emergency department or the

742  
743  
744  
745  
746  
747  
748  
749  
750  
751  
752

families will be given a specimen collection kit, gel packs and a metallic envelope. When the specimen is ready for collection, a courier will pick up the specimen and cool pack at the patient’s home and deliver it to a logistics collection center at Washington University School of Medicine. This service is available 24 hours a day, year round. The stools will be stored as a part of a future project to assess the potential mechanisms of action of *Lactobacillus rhamnosus* GG, ATCC 53103 (LGG) in acute gastroenteritis.

## 5 Data Analysis

753  
754  
755  
756

The hypotheses of this study are:

757  
758  
759  
760  
761  
762  
763  
764  
765

1. In children with acute gastroenteritis, probiotic administration in the emergency department will be associated with a clinically-important decrease in the proportion of children suffering from moderate-severe disease, defined by a validated Modified Vesikari Score  $\geq 9$ , compared to placebo.
2. In children with acute gastroenteritis, probiotic administration will not be associated with serious adverse events, and will have a similar rate of side effects (e.g. bloating, fever) as compared to placebo-treated children.

766  
767  
768  
769  
770  
771  
772  
773  
774  
775  
776  
777  
778  
779  
780

All analyses will be undertaken by the intention-to-treat (ITT) principle, except for adverse events, which will use the as-treated principle (compare the subjects based on the treatment regimen that they received). Patients who drop out or inadvertently crossover will be followed and included in the ITT analysis. All statistical tests of hypotheses will be two-sided. Baseline characteristics will be analyzed to determine if there is a need to adjust for differences between groups in exploratory analyses. Sensitivity analyses will be performed to assess the possibility and consequences of non-random loss to follow-up. The proportions of children experiencing an unscheduled healthcare visit or any potential adverse effect, as reported by the caregivers, will be compared between groups using the Mantel-Haenszel test, stratified by site. The analysis will evaluate the presence/absence of pre-specified side effects, as an aggregate outcome variable. A per-protocol analysis will be conducted to provide additional insight as non-compliance may result in an underestimation of the benefits of probiotics in the ITT analysis.<sup>72</sup>

781  
782  
783

### 5.1 Specific Aim Analyses

784 Specific Aim 1. Determine the clinical effectiveness of probiotic administration to re-  
785 duce morbidity in children presenting to the emergency department with acute

786  
787  
788  
789  
790  
791  
792  
793  
794  
795  
796  
797  
798  
799  
800  
801  
802  
803  
804  
805  
806  
807  
808  
809  
810  
811  
812  
813  
814  
815  
816  
817  
818  
819  
820  
821  
822  
823  
824  
825

gastroenteritis.

The primary efficacy endpoint of this study is the presence of moderate-severe acute gastroenteritis, as defined by a total post-enrollment Modified Vesikari Score  $\geq 9$  during the 2-week follow-up period. Each of the 7 items in the score is tabulated individually (maximum of 20 points); the sum of these individual variables represents the total Modified Vesikari Score. At the time of randomization a baseline Modified Vesikari Score will be assigned based on symptoms prior to randomization. This baseline score will serve as a covariate in a secondary analysis of the primary outcome. The post-enrollment Modified Vesikari Score which will be employed to determine the presence/absence of the primary efficacy outcome, is based only on symptoms that occur between randomization and day 14, the conclusion of the study period for this outcome. Only symptoms and outcomes that occur following randomization will be included in the post-enrollment score.

The post-enrollment score is calculated only once, on day 14. At that time, each of the seven variables will be assigned a score for the entire study period (from randomization to day 14). Each variable will be scored by 1 of 3 methods:

1. Worst 24 hour period - maximal number of episodes of vomiting in a 24 hour period, maximal number of episodes of diarrhea in a 24 hour period, and maximal temperature;
2. Total duration of symptoms, including the number of days on which any gastroenteritis-related symptom occurred;
3. Occurrence of a treatment outcome or unscheduled subsequent healthcare utilization. If the patient was admitted directly following their enrollment ED visit and that admission stay is longer than 48 hours, it will be included as treatment in the post enrollment MVS. If the patient's admission stay was less than 48 hours, it will not be included in any MVS calculation.

The primary efficacy endpoint (the presence of moderate or severe disease, as defined by a total Modified Vesikari Score  $\geq 9$  during the 2 week follow-up period) will be limited to symptoms and outcomes that occur after randomization. If a patient's symptoms of vomiting and diarrhea stop during the same 24 hours, and then recur, that is not included in the post-enrollment score since that will be considered a new illness. In the original score, severe disease was defined as  $\geq 11$ <sup>61, 62, 73-75</sup> and moderate as  $\geq 9$ .<sup>76</sup> In our derivation and validation pilot studies,<sup>12, 13</sup> construct validity was demonstrated and validated by using scores of  $\geq 9$  to define moderate and  $\geq 11$  to define severe disease.

826 These cut-points were associated with significant increases in other measures of disease  
827 severity such as degree of dehydration, likelihood of admission and daycare (p = 0.01)

828  
829  
830

831 and parental work absenteeism ( $p < 0.001$ ).<sup>12, 13</sup>

832

833 The proportion of children with moderate-to-severe disease (i.e. Modified Vesikari  
834 Score 9), the primary outcome, will be analyzed by comparing proportions utilizing a  
835 Mantel-Haenszel test, stratified by participating center and by duration of symptoms at  
836 enrollment. Significance for this primary outcome measure will be set at 0.05. Secondary  
837 analyses of the primary outcome will use logistic regression methods to adjust for covariates  
838 that may be imbalanced between groups, (e.g. age, pre-enrollment Modified Vesikari  
839 Score, hydration assessment, need for hospitalization at index visit). We will also analyze  
840 the outcome using Modified Vesikari Score as a continuous variable through a stratified  
841 Wilcoxon rank-sum test and compare the results with the primary analysis.

842

843 Specific Aim 2. Determine the safety and side effect profiles of *Lactobacillus*  
844 *rhamnosus* GG, ATCC 53103 (LGG) in children presenting to the emergency  
845 department with acute gastroenteritis.

846

847 The primary safety endpoint of this study is the occurrence of invasive disease (in-  
848 cluding meningitis and bacteremia) from *Lactobacillus rhamnosus*. The secondary safety  
849 outcome will be the presence of any adverse events. For more information on adverse  
850 events, see Section 8.3 on page 33. Adverse events (including serious) will be tabulated  
851 by study arm for DSMB reporting and for final analysis of the safety of *Lactobacillus*  
852 *rhamnosus* GG, ATCC 53103 (LGG) in this setting. Adverse events will also be coded  
853 using the MedDRA vocabulary.

854

855 Side Effects: Occurrence of side effects such as weakness, bloating, gas, intestinal  
856 rumbling, diarrhea, blood in stool, abdominal pain, abdominal cramps, nausea, vomiting,  
857 loss of appetite, heartburn, constipation, skin rash, fever, nasal congestion, sore throat,  
858 cough, headache, muscle aches, chills, and diaper rash. These will be tabulated and  
859 compared by study arm.

860

861

## 5.2 Secondary Study

862

### Outcomes

863

864 Secondary outcomes will include three of the individual components of the Modified  
865 Vesikari Score considered independently and one additional measure of burden of illness.  
866 Specifically, they are:

867

868

869

1. Diarrhea duration: Time from randomization until the appearance of the last watery stool as reported during daily surveys.

- 870 2. Vomiting duration: Time from randomization until the last vomiting episode as  
871 reported during daily surveys. Vomiting duration is only evaluated in children who  
872 vomited 3 times during the 24 hours prior to the emergency department visit.

- 873  
874  
875  
876 3. Return visits: Return visits for unscheduled care to a healthcare provider related  
877 to vomiting, diarrhea, dehydration, fever, or fluid refusal, within 2 weeks of the  
878 index visit. Scheduled visits (e.g. reassessment, vaccinations, unrelated issues) will  
879 not be included.  
880
- 881 4. Missed daycare: Days of daycare missed by subjects who attend daycare.  
882
- 883 5. Missed work: Days of work missed by caregivers who work outside of the home.  
884
- 885 6. Household transmission rate: A household census will be obtained at the time  
886 of enrollment, and information about household contacts symptoms will be obtained  
887 during daily surveys to determine household transmission rate.  
888

889 The overall significance level for statistical tests on the secondary outcomes will be  
890 set at 0.05. Holm's method will be used to adjust for multiple comparisons.<sup>77</sup> The  
891 continuous variables of duration of diarrhea and duration of vomiting (measured in hours  
892 and analyzed with a Van Elteren test),<sup>78</sup> will be stratified by clinical center. Similarly,  
893 the number of days the child is absent from daycare and the caregiver is absent from work  
894 will be analyzed with a Van Elteren test, stratified by clinical center and etiology.  
895

896 Dichotomous outcomes to be evaluated include emergency department acute gastroenteritis-  
897 related revisits, intravenous rehydration, and hospitalization. Additional analyses involving  
898 these outcomes will include linear and logistic regression models that adjust for possible  
899 effects of baseline characteristics.  
900  
901

### 902 5.3 Sample Size Calculations and Statistical 903 Power

904  
905 The primary analysis will be performed on a binary outcome: development of moderate-  
906 to-severe disease. The power of this analysis is based on the proportion of patients with  
907 moderate-to-severe disease. Our pilot data<sup>12, 13</sup> indicate that 25% of patients will have  
908 moderate to severe disease during the course of their illness. Furthermore expert surveys  
909 indicated that an absolute risk reduction of 10% would constitute a minimal clinically-  
910 important difference (MCID). Therefore our sample size calculation assumed a 25% event  
911 rate in the control group for which we desire to detect an absolute beneficial treatment  
912 effect of 10% with 90% power. Using a two-sided type I error ( $\alpha$ ) of 0.05 and the hypothe-  
913 sized proportions yields a required total sample size of 670 patients.<sup>79</sup> Our expected power,  
914 should we find different event rates in our 2 groups, is displayed in Table 2 on the next page.  
915

916 Based on previous work by our group,<sup>70, 71, 80</sup> we assumed a 10% loss to follow up  
917 ( $670/0.90 = 744$ ), 5% drop out, and 3% drop in (caregivers who buy a probiotic agent

918  
919  
920  
921

| Outcome Control | Outcome Intervention | % Difference | Power |
|-----------------|----------------------|--------------|-------|
| 0.30            | 0.21                 | 9%           | 0.76  |
| 0.30            | 0.20                 | 10%          | 0.85  |
| 0.25            | 0.15                 | 10%          | 0.90  |
| 0.25            | 0.16                 | 9%           | 0.82  |
| 0.25            | 0.17                 | 8%           | 0.72  |
| 0.20            | 0.10                 | 10%          | 0.95  |
| 0.20            | 0.12                 | 8%           | 0.81  |
| 0.20            | 0.13                 | 7%           | 0.69  |

922

Table 2: Power Analysis

923

924

925

926

927

to administer to their child) rate  $(744/(0.92)^2 = 879)$ . Adjustment for O’Brien-Fleming monitoring boundaries requires a further 2% increase. Thus, the total number randomized (final sample size) will be 897.

928

929

930

931

932

933

934

### 5.3.1 Enrichment Design

935

936

937

938

The above study design and power analysis are based on the assumption of homogeneous treatment effect. We may also incorporate an enrichment design<sup>81, 82</sup> to restore the statistical power in case the presence of a subpopulation with a substantially low treatment effect is identified. We are particularly interested in two potential subpopulations: participants with <2 days of symptoms and those with ≥ 2 days of symptoms. Based on our pilot data, each subpopulation accounts for approximately 50% of the total population. The decision for enrollment modification will be made at the first interim analysis for efficacy. Specifically, three statistics (based on a normal approximation of binomial distribution, or z-statistics) will be calculated to compare the primary efficacy endpoint between treatment and control groups for subjects in the total population and the two subpopulations, respectively. If the z-statistic from a subpopulation is <0.3 and also smaller than that in the total population, subjects from this subpopulation will no longer be considered in the subsequent enrollment. All subjects, regardless of symptom duration will be included in the final analyses. Our simulation studies have shown that such an enrichment design can increase the power considerably when the treatment effects

939

940

941

942

943

944

945

946

947

948

949

950

951

952

953 are different across subpopulations, while it will have little impact on power when the  
954 treatment effects are similar.

955  
956  
957  
958  
959  
960  
961  
962  
963  
964  
965  
966

5.3.2 Sub-group Analyses

The presence of a Modified Vesikari Score ≥ 9 will be analyzed by age <1 year, duration of symptoms, breast-feeding status, antibiotic usage, rotavirus and norovirus positivity. A subgroup effect will be considered significant if the interaction between subgroup and treatment in a logistic regression model is significant at a Bonferroni-corrected level.

967 5.4 Recruitment Estimates and  
968 Attrition

969 5.4.1 Recruitment

970 To estimate the number of subjects with acute gastroenteritis of eligible ages that would  
971 meet all inclusion criteria and be enrolled annually, we obtained discharge diagnoses  
972 from all study sites for 2005-2011. In 2011, the study sites evaluated 14,048 potentially  
973 eligible subjects (patients 3-48 months with ICD9 codes for diarrhea) out of 507,039  
974 total emergency department visits (2.8%). In the past 7 years the lowest proportion of  
975 such patients per total emergency department volume was 2.3% (2008). Therefore, using  
976 2011 emergency department volumes and lowest proportion of patients with diarrhea our  
977 conservative estimate for eligible patients would be 11,150 patients 3-48 months with  
978 diarrhea per year (or 30 patients per day network wide). Our best estimate is that 4.5%  
979 of children with acute gastroenteritis aged 3-48 months will be enrolled. We plan to enroll  
980 225 patients/year and 970 subjects over 4 acute gastroenteritis seasons.  
981  
982  
983

984 5.4.2 Potential for Bias

985 Reporting bias will be minimized by adhering to CONSORT recommendations including  
986 the use of third-party assignment.<sup>83</sup> Placebo capsules and active drug will be provided  
987 by I-Health Inc. The total weight of all capsules is 325 mg. The probiotic and placebo  
988 capsules and powder are identical in appearance, taste, texture, and odor. Participants,  
989 families, healthcare providers, data collectors, outcome adjudicators, and data analysts  
990 will be blinded as to intervention arm, thereby preventing bias in outcome assessment.  
991 Two DCC statisticians will be partially unblinded (with knowledge of group  
992 assignments, but not group identities) in order to present interim results to the DSMB.  
993 An intention- to-treat analysis will be performed to minimize bias associated with  
994 poor compliance and non-random loss of participants.<sup>84</sup> Co-interventions (e.g.  
995 antiemetic administration, intravenous rehydration) and other potential sources of  
996  
997

998 confounding will be recorded. Our use of a published validated score as an outcome  
999 measure will protect against the introduction of bias in the assessment of treatment  
1000 effects.<sup>85</sup>

1001  
1002  
1003  
1004  
1005  
1006  
1007  
1008  
1009  
1010  
1011  
1012  
1013

### 5.4.3 Compliance

Noncompliance with probiotics is rarely reported in previous studies, and not expected to be problematic in this cohort.<sup>86,87</sup> Participant withdrawal has been related mostly to the primary illness.<sup>19</sup> In the Canadian pilot study, compliance was 91%. We will track compliance by obtaining information from parents during the day 5 follow-up contact. If there are any unused capsules, we will request their return (a pre-stamped, pre-addressed envelope will be provided).

1014  
1015  
1016  
1017  
1018  
1019  
1020  
1021  
1022  
1023  
1024  
1025  
1026  
1027  
1028  
1029

### 5.4.4 Loss to Follow-up

Our previous emergency department pediatric acute gastroenteritis research studies achieved telephone follow-up rates of 98% on day 3 and 96% on day 7.<sup>70</sup> Similar success has been documented in other PECARN multicenter studies (91%).<sup>80</sup> We estimate a 10% loss to follow-up. If daily contact does not occur, we will collect data from missed days on subsequent days when caregivers are contacted. The use of patient diaries (paper and/or electronic) and chart review will supplement parent contact. Based on our pilot trial we have devised the following strategies to maximize follow-up: all follow-up procedures will be centralized at the lead institution and conducted by experienced study staff; we will obtain multiple phone numbers from caregivers as well as emergency contacts, and we will schedule calls and send reminders prior to the call if preferred. Finally, electronic diary filing and transmission may be available for interested families.

1030  
1031  
1032  
1033  
1034  
1035

### 5.4.5 Compensation

Financial compensation may be provided to compensate for parent's time completing follow-up. This compensation must be approved by each site's Institutional Review Board.

1036  
1037  
1038

## 6 Data Management

1039  
1040  
1041  
1042  
1043

### 6.1 Clinical Sites

Study data will be recorded on paper work forms or by direct data entry into an electronic data capture (EDC) system. If paper work forms are used they will be retained at the clinical site. The data from the work forms will then be entered into the EDC system

1044 provided by the Data Coordinating Center at the University of Utah School of  
1045 Medicine.

1046

1047 The clinical investigator at each participating site will complete a Form FDA 1572,  
1048 Statement of Investigator. That individual is responsible for all aspects of study imple-

1049  
1050  
1051  
1052  
1053  
1054  
1055  
1056  
1057  
1058  
1059  
1060  
1061  
1062  
1063  
1064  
1065  
1066  
1067  
1068  
1069  
1070  
1071  
1072  
1073  
1074  
1075  
1076  
1077  
1078  
1079  
1080  
1081  
1082  
1083  
1084  
1085  
1086  
1087  
1088  
1089  
1090  
1091

mentation, including administration of study drug, collection of accurate study data, and correct entry of the data into the EDC. These tasks may be specifically delegated to other individuals at the clinical site, but the clinical investigator is responsible to supervise all aspects of the study, and is responsible to assure that all staff involved in this study are adequately trained to perform the delegated tasks. All local research records will remain in a locked file in a secure room unless being used by research staff, and all computerized information will be maintained on password protected computers.

## 6.2 PECARN Data Coordinating Center (Utah)

In addition to locally secured, identifiable information, partially identifiable information for all sites will be maintained at the PECARN Data Coordinating Center, located at the University of Utah in Salt Lake City, Utah. The Data Coordinating Center has a state-of-the-art computer infrastructure with a dedicated server room with a fire suppression system, air conditioning, cooling system and separate air filtering. The server facility is locked separately from the remainder of the Data Coordinating Center and access to the building is monitored by security personnel year round. The Data Coordinating Center coordinates its network infrastructure and security with the Health Sciences Campus (HSC) information systems at the University of Utah. This provides the Data Coordinating Center with effective firewall hardware, automatic network intrusion detection, and the expertise of dedicated security experts working at the University.

Network equipment includes four high-speed switches. User authentication is centralized with two Windows 2008 domain servers. Communication over public networks is encrypted with virtual point-to-point sessions using SSL or VPN technologies, both of which provide at least 128 bit encryption. OpenClinica (Web-based clinical studies data management system), eRoom™ (Web-based collaborative workspace) and other web applications use the SSL protocol to transmit data securely over the Internet. Direct access to Data Coordinating Center machines is only available while physically located inside the Data Coordinating Center offices, or via a VPN client. All network traffic is monitored for intrusion attempts, security scans are regularly run against our servers, and IT staff are notified of intrusion alerts.

Production servers running mission critical applications are clustered and configured for failover events. Servers are backed up with encryption through a dedicated backup server that connects across an internal 10 gigabit network to a tape drive. Storage area

1092 networking (SAN) applications, clusters, and switch-to-switch links are also on a 10  
1093 gigabit network. Incremental backups occur hourly during the week. Incremental backups

1094  
1095  
1096  
1097  
1098  
1099  
1100  
1101  
1102  
1103  
1104  
1105  
1106  
1107  
1108  
1109  
1110  
1111  
1112  
1113  
1114  
1115  
1116  
1117  
1118  
1119  
1120  
1121  
1122  
1123  
1124  
1125  
1126  
1127  
1128  
1129  
1130  
1131  
1132  
1133  
1134  
1135  
1136

also are performed nightly with full system backups occurring every week. Tapes are stored in a fireproof safe inside the data center facility, and full backups are taken to an off-site commercial storage facility. Security is maintained with Windows 2008 user/group domain-level security.

Users are required to change their passwords every 90 days, and workstations time out after 5 minutes of inactivity. All files are protected at group and user levels; database security is handled in a similar manner with group level access to databases, tables, and views in Microsoft SQL Server. All portable computers are whole-disk-encrypted.

### 6.3 Data Confidentiality

The PI and other research personnel have all completed training and received certification in Human Subjects Research Protection and HIPAA. All project staff hired will also successfully complete this training prior to engaging in any research or treatment with study participants and renew this training as required by their institution.

The investigators and staff of the Data Coordinating Center are fully committed to the security and confidentiality of all data collected for PECARN studies. All Data Coordinating Center personnel at the University of Utah have signed confidentiality agreements concerning all data encountered in the center. Violation of these agreements may result in termination from employment at the University of Utah. In addition, all personnel involved with data coordinating center data systems have received Human Subjects Protection and HIPAA education.

The staff, reviewers and investigators involved with this study will be required to sign agreements from the Data Coordinating Center that relate to maintenance of passwords, information system security, and data confidentiality.

### 6.4 Data Quality Management and Monitoring

1137 The Data Coordinating Center monitors PECARN studies on behalf of the investigators  
1138 and the funding agency. The purposes of monitoring include demonstration of adherence  
1139 to human subjects protection requirements and assurance of high quality study data.  
1140 Monitoring is usually done remotely and may also involve physical site monitoring visits.  
1141 Site monitoring is described in more detail in Section 9.2.

1142  
1143  
1144  
1145  
1146  
1147  
1148  
1149  
1150  
1151  
1152  
1153  
1154  
1155  
1156  
1157  
1158  
1159  
1160  
1161  
1162  
1163  
1164  
1165  
1166  
1167  
1168  
1169  
1170  
1171  
1172  
1173  
1174  
1175  
1176  
1177  
1178  
1179  
1180  
1181  
1182

## 6.5 Record Access

The medical record and study files (including informed consent, permission, and assent documents) must be made available to authorized representatives of the Data Coordinating Center, upon request, for source verification of study documentation. In addition, medical information and data generated by this study must be available for inspection upon request by representatives of the the National Institutes of Health, Food and Drug Administration, and the Institutional Review Board (IRB) for each study site.

## 7 Protection of Human Subjects

### 7.1 Institutional Review Board (IRB) Approval

The Data Coordinating Center and each clinical center must obtain approval from their respective IRB prior to participating in the study. The Data Coordinating Center will track IRB approval status at all participating centers and will not permit subject enrollment without documentation of initial IRB approval and maintenance of that approval throughout subsequent years of the project.

### 7.2 Informed Consent

This protocol requires that parents or other legally empowered guardians sign a parental permission form. The parent or legal guardian will be informed about the objectives of the study and the potential risks. Parents or legal guardians of eligible children with symptoms of gastroenteritis will be approached to provide permission for their child's participation in the study. Parental or guardian permission will be obtained prior to initiation of study activities. Documentation of parental permission will be maintained at the study site. As the maximum eligible age is 48 months, child assent is not applicable.

### 7.3 Potential Risks

1183 Lactobacilli are ubiquitous in the human diet and are a large part of the over 1 trillion  
1184 live bacteria that reside in the gastrointestinal tract of healthy individuals. Overall, Lac-  
1185 tobacillus rhamnosus GG, ATCC 53103 (LGG) is well tolerated in the pediatric patient  
1186 population. Infections (bacteremia, endocarditis, pneumonia, deep abdominal abscesses)  
1187 have been reported in sick neonates, severely debilitated and immune-compromised in-  
1188 dividuals given probiotics. The use of probiotics in these individuals continues to be  
1189 controversial; however prospective studies have been conducted in adults and children

1190  
 1191  
 1192  
 1193  
 1194  
 1195  
 1196  
 1197  
 1198  
 1199  
 1200  
 1201  
 1202  
 1203  
 1204  
 1205  
 1206  
 1207  
 1208  
 1209  
 1210  
 1211  
 1212  
 1213  
 1214  
 1215  
 1216  
 1217  
 1218  
 1219  
 1220  
 1221  
 1222  
 1223  
 1224  
 1225  
 1226  
 1227  
 1228  
 1229

with HIV as well as preterm neonates, with no reported systemic infections. Finally, there are 7 case reports of invasive disease after administration of *Lactobacillus rhamnosus* GG, ATCC 53103 (LGG). These occurred in patients in intensive care units, in patients with central venous catheters, or in patients who are on immunosuppressive therapy, have short gut syndrome, or are at risk for endocarditis. These risk factors are exclusion criteria from our study population.

The clinical risks of invasive infection from *Lactobacillus rhamnosus* are related to receiving *Lactobacillus rhamnosus* GG, ATCC 53103 (LGG). There are risks associated with acute gastroenteritis that are not related to study participation, including dehydration, electrolyte abnormalities, systemic infection and co-infection, and hospital admission. All subjects will be clinically treated for acute gastroenteritis in accordance with local site treatment protocols. There may be other unknown risks of *Lactobacillus rhamnosus* GG, ATCC 53103 (LGG) in children with acute gastroenteritis.

Loss of confidentiality is always a risk in a study, but safeguards are in place to protect against this.

## 7.4 Protections Against Potential Risks

Several steps will be taken to minimize the risks of participation in the study. All of the participating clinical centers are tertiary pediatric hospitals with highly trained pediatric staff. Subjects will be closely followed after discharge. Families will be contacted daily until both the diarrhea and vomiting have resolved and the treatment has been completed. Additional contact will be made on day 14, and months 1, 3, 6, 9 and 12 for long term safety outcomes. Parents or legally authorized representatives will also receive specific instructions as to when to see a health care provider. If an adverse event is reported at the time of follow-up, research personnel will refer subjects for appropriate medical care, when applicable.

Loss of confidentiality will be mitigated by the use of the PECARN Data Coordinating Center which has a highly secure IT infrastructure, and by the existence of trained research staff at participating sites. Data security is described in Section 6.

1230 **7.5 Potential**

1231 **Benefits**

1232  
1233 Subjects participating in the study may benefit directly by experiencing less severe disease,  
1234 shorter duration of symptoms, and decreased need for further health care utilization.

1235  
1236  
1237  
1238  
1239  
1240  
1241  
1242  
1243  
1244  
1245  
1246  
1247  
1248  
1249  
1250  
1251  
1252  
1253  
1254  
1255  
1256  
1257  
1258  
1259  
1260  
1261  
1262  
1263  
1264  
1265  
1266  
1267  
1268  
1269  
1270  
1271  
1272  
1273  
1274  
1275  
1276  
1277

There may also be reduced symptoms (i.e. diarrhea, vomiting, fever) and morbidity, thereby diminishing acute gastroenteritis-associated resource consumption (e.g. physician visits, hospitalization) and societal costs. Additional benefits in the study include closer monitoring of symptoms and potentially earlier recognition of any worsening of acute gastroenteritis due to the frequency of telephone follow up and communication with the family. The knowledge gained in this study may lead to improved treatment options for gastroenteritis for other children and lead to new therapeutic options for future patients. Subjects and their families may therefore benefit indirectly by participating in research with the potential to provide subsequent benefit to others. Finally, future analysis of bulk stool specimens will enable a better understanding of potential mechanisms of action of *Lactobacillus rhamnosus* GG, ATCC 53103 (LGG), which will likely provide benefit to future patients.

## 8 Data and Safety Monitoring Plan

### 8.1 Data Safety Monitoring Board (DSMB)

This study will have a Data Safety Monitoring Board (DSMB) appointed in accordance with instructions from the NICHD program officer. The DSMB will have a charter, will approve the protocol prior to implementation, and will review interim analyses for safety and efficacy.

The purpose of the DSMB is to advise the Federal funding agency (NICHD), the study Principal Investigator (Dr. Schnadower), and the PECARN Steering Committee regarding the continuing safety of study subjects and the continuing validity and scientific merit of the study. The DSMB is responsible for monitoring accrual of study subjects, adherence to the study protocol, assessments of data quality, performance of individual clinical sites, review of serious adverse events and other subject safety issues, and review of formal interim statistical analyses of treatment efficacy.

The Data Coordinating Center will send reports relating to these topics to DSMB members prior to each DSMB meeting. The Data Coordinating Center will staff DSMB meetings. The production and approval of DSMB minutes will be done in accordance with requirements of the NICHD. Each DSMB meeting will have a summary recommendation that will be provided to each participating clinical site for submission to the local

1278 Institutional Review Board (IRB). More detailed information from the DSMB meetings  
1279 will not be routinely provided for local IRB submission.

1280  
1281  
1282  
1283  
1284  
1285  
1286  
1287  
1288  
1289  
1290  
1291  
1292  
1293  
1294  
1295  
1296  
1297  
1298

## 8.2 Frequency of Interim Analysis:

The Data Safety Monitoring Board (DSMB) will meet after 80 patients (safety end points for 1 month), approximately 350 patients (end of 2nd year of enrollment) and 620 patients (end of 3rd year of enrollment) to review enrollment, study procedures, loss to follow-up, drop-in rate, and interim safety and efficacy results. The analyses will test the hypothesis that the probability of developing moderate-to-severe acute gastroenteritis in the probiotic arm is equal to that in the placebo arm. An analysis will also be conducted after 20 subjects under 6 months of age have been enrolled. The DSMB is to review interim data and make recommendations regarding continuation or modification of the study based on safety in this age group. Conservative O'Brien-Fleming monitoring boundaries, implemented using the Lan-DeMets  $\alpha$ -spending function approach, will be used as guidelines for early stopping for efficacy.

## 8.3 Adverse Event Reporting

### 8.3.1 Definitions, Relatedness, Severity and Expectedness

**Definition:** An adverse event (AE) is any untoward medical occurrence experienced by a subject. An event constitutes a disease, a set of related signs or symptoms, or a single sign or symptom. On each study day, the site investigators will evaluate adverse events. Study staff will obtain information on symptoms and adverse events on scheduled follow up calls. Adverse events not previously documented in the study will be recorded on the adverse event record form. The nature of each experience, date and time (where appropriate) of onset, outcome, course, and relationship to treatment should be established.

**Side Effects:** Occurrence of side effects such as weakness, bloating, gas, intestinal rumbling, diarrhea, blood in stool, abdominal pain, abdominal cramps, nausea, vomiting, loss of appetite, heartburn, constipation, skin rash, fever, nasal congestion, sore throat, cough, headache, muscle aches, chills, and diaper rash. Study staff will obtain information about side effects on scheduled follow up contacts.

**Relatedness:** The suspected relationship between study interventions and any adverse event will be determined by the site investigator using the following criteria. Relatedness may **not** be assessed by a research coordinator, and must be assessed by an investigator.

1323  
1324  
1325

Not Related: The event is clearly related to other factors, such as the subject's clinical state, therapeutic interventions, or concomitant drugs administered to the subject.

1326  
1327  
1328  
1329  
1330  
1331  
1332  
1333  
1334  
1335  
1336  
1337  
1338  
1339  
1340  
1341  
1342  
1343  
1344  
1345  
1346  
1347  
1348  
1349  
1350  
1351  
1352  
1353  
1354  
1355  
1356  
1357  
1358  
1359  
1360  
1361  
1362  
1363  
1364  
1365  
1366  
1367

**Possibly Related:** The event follows compatible temporal sequence from the time of beginning the assigned study intervention, but could have been produced by other factors such as the subject’s clinical state, therapeutic interventions, or concomitant drugs administered to the subject.

**Probably Related:** The event follows a reasonable temporal sequence from the time of beginning the assigned study intervention, and cannot be reasonably explained by other factors such as the subject’s clinical state, therapeutic interventions, or concomitant drugs administered to the subject.

Some toxicities will be difficult to distinguish from abdominal symptoms related to acute gastroenteritis (such as bloating, abdominal pain, diarrhea, fever and diaper rash), and only at the time of analysis will we be able to determine whether these signs and symptoms are different between the groups.

**Seriousness:** The severity of clinical adverse events and laboratory abnormalities will be recorded by the site investigator and categorized. A serious adverse event (SAE) is an adverse event that:

- results in death; or
- is life-threatening (the patient was, in the view of the site investigator, in immediate danger of death from the event as it occurred); or
- requires inpatient hospitalization or prolongs an existing hospitalization; or
- results in persistent or significant disability or incapacity; or
- results in congenital anomaly/birth defect; or
- any other event that, based upon appropriate medical judgment, may jeopardize the subject’s health and may require medical or surgical intervention to prevent one of the other outcomes listed in this definition.

**Expectedness of the Event:** All adverse events, including serious adverse events, will be evaluated as to whether their occurrence was expected or unexpected. An adverse event is considered expected if it is known to be associated with acute gastroenteritis (acute gastroenteritis), other underlying medical conditions of the subject, is directly related to study outcome, or is otherwise mentioned in the protocol, informed consent, investigator brochure, or other study documents. Expected complications of acute gastroenteritis include abnormal taste, malaise, abdominal distention, foul smelling stools, dehydration,



1370  
1371  
1372  
1373  
1374  
1375  
1376  
1377  
1378  
1379  
1380  
1381  
1382  
1383  
1384  
1385  
1386  
1387  
1388  
1389  
1390  
1391  
1392  
1393  
1394  
1395  
1396  
1397  
1398  
1399  
1400  
1401  
1402  
1403  
1404  
1405  
1406  
1407  
1408  
1409  
1410  
1411  
1412  
1413

Treatment or Action Taken: For each adverse event, the site investigator will record whether an intervention was required:

- Intervention: Surgery or procedure
- Other Treatment: Medication initiation, change, or discontinuation
- None: No action taken

Outcome of Event: Finally, the site investigator will record the clinical outcome of each adverse event as follows:

- Death
- Recovered and the patient returned to baseline status
- Recovered with permanent sequelae
- Symptoms continue

### 8.3.2 Time Period for Adverse Events

For purposes of this study, adverse events occur following randomization through 30 days after the last study drug dose will be recorded. Serious adverse events, unexpected medically attended events, and new onset chronic illnesses will be recorded from randomization through twelve months after the last study dose. Specifically, events that occur following parental permission to participate in the study, but prior to actual randomization, are not adverse events. These should be recorded as baseline conditions.

### 8.3.3 Data Collection Procedures for Adverse Events

After patient randomization, all adverse events (including serious adverse events), whether anticipated or unanticipated, will be recorded according to the date of first occurrence, severity, and their duration, as well as any treatment prescribed. Any medical condition present at the time of randomization, recorded in the patient's baseline history at study entry, which remains unchanged or improves, will not be recorded as an adverse event at subsequent evaluations. However, worsening of a medical condition that was present at the time of randomization will be considered a new adverse event and reported.

1414 Abnormal laboratory values that are clinically significant will be recorded as adverse  
1415 events and the site investigator will assess the severity and relationship to the study.  
1416 Laboratory values that are abnormal at the time of randomization and that do not worsen

1417  
 1418  
 1419  
 1420  
 1421  
 1422  
 1423  
 1424  
 1425  
 1426  
 1427  
 1428  
 1429  
 1430  
 1431  
 1432  
 1433  
 1434  
 1435  
 1436  
 1437  
 1438  
 1439  
 1440  
 1441  
 1442  
 1443  
 1444  
 1445  
 1446  
 1447  
 1448  
 1449  
 1450  
 1451  
 1452  
 1453  
 1454  
 1455  
 1456  
 1457  
 1458

will not be recorded as adverse events.

Adverse events will be coded using the MedDRA coding vocabulary. Coding will be done centrally at the Data Coordinating Center because this requires specific training.

### 8.3.4 Unanticipated Problems (UP)

Unanticipated problems (UP) are defined as incidents, experiences, or outcomes that are unexpected, related to participation in the study, and suggest that the research places subjects at a greater risk of harm than was previously known or recognized. The site investigator will report unanticipated problems to the Data Coordinating Center within 24 hours. A detailed completed report will be required to be sent to the Data Coordinating Center within 3 working days of the event. After receipt of the complete report, the Data Coordinating Center will report these unanticipated problems to the NICHD Program Officer or Project Officer in an expedited manner (within 24 hours). In accordance with local IRB requirements, the site investigator may be required to report such unanticipated problems to the IRB in addition to notifying the Data Coordinating Center. In the event that the medical monitor believes that such an event warrants emergent suspension of enrollment in the trial, and NICHD staff cannot be reached expeditiously, the Data Coordinating Center will notify the study investigator (Dr.Schnadower) and all site investigators to cease enrollment in the trial. Resumption of enrollment will not occur without consent of the NICHD staff after discussion with the DSMB.

### 8.3.5 Monitoring Serious Adverse Events

The Principal Investigator of the Data Coordinating Center (Dr. Dean) will act as the medical monitor for this study. If Dr. Dean is unavailable, a qualified physician will be designated to fulfill this function. Site investigators and/or research coordinators will report serious adverse events to the Data Coordinating Center within 24 hours. A detailed completed report will be required to be sent to the Data Coordinating Center within 3 working days of the event, and the medical monitor will assess all serious adverse events reported from site investigators.

For each of these serious adverse events, the site investigator will provide sufficient medical history and clinical details for a safety assessment to be made with regard to continuation of the trial. The medical monitor will sign each SAE report after review. All SAE reports will be retained at the Data Coordinating Center, and all SAE reports will be available for review by DSMB members and NICHD staff.

1459 In the unlikely event that the medical monitor believes an unexpected and study-  
1460 related SAE warrants emergent cessation of enrollment in the trial, NICHD staff and the

1461  
1462  
1463

1464 DSMB chairperson will be immediately consulted. If these individuals concur with the  
1465 judgment of the medical monitor, or if the NICHD staff and the DSMB chairperson cannot  
1466 be reached expeditiously, the Data Coordinating Center will notify the study investigator  
1467 (Dr.Schnadower) and all site investigators to cease enrollment in the trial. Resumption of  
1468 enrollment will not occur without consent of the NICHD staff after discussion with the  
1469 DSMB.

1470 In accordance with local IRB requirements, the site investigator may be required to  
1471 report such events to the IRB in addition to notifying the Data Coordinating Center.

1472 After notification of the NICHD Program Officer or Project Officer, and the DSMB  
1473 chairperson, of serious, unexpected, and study-related adverse events or unanticipated  
1474 problems (UP), decisions will be made whether to continue the study without change,  
1475 and whether to convene the entire DSMB for an emergent meeting. If a decision is made  
1476 to suspend enrollment in the trial, this will be reported to the study investigator (Dr.  
1477 Schnadower) and all clinical investigators, who will be instructed to report this to their  
1478 local IRB.

1479 The DSMB will review all adverse events (not necessarily serious, unexpected, and  
1480 study-related) during scheduled DSMB meetings. The Data Coordinating Center will  
1481 prepare a Summary Report of Adverse Events for the DSMB meetings, classified with  
1482 the MedDRA coding system.  
1483  
1484

### 1485 8.3.6 Follow-up of Serious, Unexpected and Related Adverse Events

1486  
1487 All serious, unexpected and related adverse events, that are unresolved at the time of the  
1488 patient's termination from the study or discharge from the hospital, will be followed by  
1489 the Clinical Center investigators until the events are resolved, subject is lost to follow-up,  
1490 the adverse event is otherwise explained or has stabilized, or 12 months have passed from  
1491 the time of last study dose.  
1492  
1493

## 1494 9 Study Training and Monitoring

1495

### 1496 9.1 Study 1497 Training

1498  
1499 A formal training program for investigators and research staff will be held prior to the  
1500 start of enrollment. The training program will cover regulatory topics and Good Clinical  
1501 Practice. The training will also provide in depth explanations regarding study procedures,  
1502 clinical care, adverse event reporting, data entry procedures, quality assurance, site

1503 monitoring, and the informed consent process. A manual of operations will be provided  
1504 to each Clinical Center investigator prior to the start of enrollment. The manual will

1505  
1506  
1507  
1508  
1509  
1510  
1511  
1512  
1513

detail specific information about the study procedures, regulatory information, safety reporting, and other necessary information. Updates and revisions to the manual will be made available electronically. The Data Coordinating Center, in collaboration with the study investigator (Dr. Schnadower), will be the main contact for study questions.

1514

## 9.2 Study

1515  
1516

### Monitoring

1517  
1518  
1519  
1520  
1521  
1522  
1523  
1524  
1525  
1526  
1527

The investigators recognize the importance of ensuring data of excellent quality. Site monitoring is critical to this process. Site monitoring has been a very effective tool for maintaining data quality in previous PECARN studies, and we will utilize this process to ensure excellent quality data in the proposed study. Our site monitoring plan is designed to identify problems with sites and methods for handling problems that arise. Site monitors must be provided with full access to study materials and the medical records for study subjects. If the medical records are in electronic form, the clinical investigator or an authorized individual must provide any assistance necessary to facilitate the site monitor's review of data in the electronic medical record.

1528  
1529

#### 9.2.1 Site Monitoring Plan

1530  
1531  
1532  
1533  
1534  
1535  
1536  
1537  
1538  
1539

A supplemental study-specific monitoring plan, separate from the protocol will be completed which outlines specific criteria for monitoring. This plan will include the number of planned site visits, criteria for focused visits, or additional visits, a plan for chart review and a follow up plan for non-compliant sites. The monitoring plan also describes the type of monitoring that will take place (e.g. sample of all subjects within a site; key data or all data), the schedule of visits, how they are reported and a time frame to resolve any issues found. Remote site monitoring schedules will be determined by the Data Coordinating Center in coordination with the study principal investigator.

1540  
1541

#### 9.2.2 Clinical Site Monitoring

1542  
1543  
1544  
1545  
1546  
1547  
1548

Site monitoring visits will be performed by a trained site monitor during the study period to ensure regulatory compliance, patient safety, and to monitor the quality of data collected. Essential document binders, regulatory documents and data collection forms may be reviewed. Interim visits will take place depending on grant budget, site enrollment, and compliance issues identified. The site monitor will provide each site with a written report, and sites will be required to follow up on any deficiencies. It is anticipated that the study monitoring visits for this protocol will consist of a site initiation visit (prior

1549 to patient enrollment), interim visits, and a close out visit. The site initiation may take  
1550 place as group training made up of site investigators and research assistants.

1551

1552

1553

1554

1555

### 9.2.3 Remote Monitoring

1556

1557

1558

1559

1560

1561

1562

1563

1564

1565

1566

1567

1568

1569

The Data Coordinating Center may supplement on-site monitoring with remote monitoring activities. Remote monitoring involves detailed review of the data entered by the Clinical Center and consultations with the Clinical Center investigator and/or research coordinator to review safety and data quality. This may require uploading de-identified copies of specific parts of the medical record, patient study file, regulatory documentation, or other source documents to the Data Coordinating Center staff, who review those materials against the data recorded in the electronic data capture system. This helps assure protocol compliance and accurate data collection. The Data Coordinating Center may conduct more remote monitoring activities early in the trial to assure protocol compliance and identify any training issues that may exist. Remote monitoring the documents will be retained in accordance with federal requirements. Safety of subjects will be monitored and ensured in accordance with the Data and Safety Monitoring Board (DSMB) plan.

1570

1571

### 9.2.4 Pharmacy Monitoring

1572

1573

1574

1575

1576

1577

1578

The Clinical Center pharmacy must maintain adequate records of all dispensed study drug. Each pharmacy may be monitored, either in person or remotely, and may be requested to send copies of these documents to the Data Coordinating Center. Since this study will use a central pharmacy, that pharmacy must also maintain adequate records and may also be monitored.

1579

## 10 Regulatory Issues

1580

1581

### 10.1 Food and Drug Administration

1582

1583

1584

1585

1586

1587

1588

1589

This trial is being conducted under an Investigational New Drug application approved by the Food and Drug Administration (Investigational New Drug application #15371). The clinical investigator at each participating site will complete a Form FDA 1572, "Statement of Investigator."

1590

### 10.2 Health Insurance Portability and Accountability Act

1591

1592

1593 The abstracted data will include limited identifiers as defined by the Health Insurance  
1594 Portability and Accountability Act, and specific contact information will be provided to  
1595 research sta<sup>e</sup> conducting follow up with parents. Abstracted data will be retained and  
1596 archived at the Data Coordinating Center in accordance with record retention requires  
1597 of the Food and Drug Administration and the NIH. Contact information will not be

1598  
 1599  
 1600  
 1601 provided to the Data Coordinating Center (it will be provided directly to the central  
 1602 follow up research staff). For data analysis outside the Data Coordinating Center (e.g.,  
 1603 when a public access database is made available), the Data Coordinating Center will  
 1604 create a completely de-identified analytical database for use by the study investigators,  
 1605 and for final archiving. All study sites have been or will be offered Business Associate  
 1606 Agreements with the University of Utah. Copies of signed Business Associate Agreements  
 1607 are maintained at the Data Coordinating Center.  
 1608  
 1609

### 1610 10.3 Inclusion of Women and 1611 Minorities

1612  
 1613 The gender, ethnic and racial composition of patients enrolled in all PECARN studies is  
 1614 a function of the underlying referral population at each PECARN site participating in  
 1615 this trial. There will be no exclusion of patients based on gender, race, or ethnicity.  
 1616  
 1617

### 1618 10.4 ClinicalTrials.gov 1619 Requirements

1620  
 1621 This trial has been registered at ClinicalTrials.gov (NCT #01773967). The title is "Impact  
 1622 of Emergency Department Probiotic (LGG) Treatment of Pediatric Gastroenteritis."  
 1623  
 1624

### 1625 10.5 Retention of 1626 Records

1627  
 1628 For federally funded studies subject to the Common Rule, records relating to the research  
 1629 conducted shall be retained for at least 3 years after completion of the research. Completion  
 1630 of the research for this protocol should be anticipated to include planned primary and  
 1631 secondary analyses, as well as subsequent derivative analyses. Completion of the research  
 1632 also entails completion of all publications relating to the research. All records shall be  
 1633 accessible for inspection and copying by authorized representatives of the regulatory  
 1634 authorities at reasonable times and in a reasonable manner [45 CFR §46.115(b)].  
 1635  
 1636

## 1637 Bibliography

- 1638  
 1639 [1] P. Coppens, M. F. da Silva, and S. Pettman. European regulations on nutraceuticals,  
 1640 dietary supplements and functional foods: a framework based on safety. *Toxicology,*

1641 221(1):59-74, 2006.  
1642  
1643 [2] L. G. Saldanha. US Food and Drug Administration regulations governing label  
1644 claims for food products, including probiotics. Clin Infect Dis, 46 Suppl 2:S119-21;  
1645 discussion S144-51, 2008.

1646  
1647  
1648  
1649  
1650  
1651  
1652  
1653  
1654  
1655  
1656  
1657  
1658  
1659  
1660  
1661  
1662  
1663  
1664  
1665  
1666  
1667  
1668  
1669  
1670  
1671  
1672  
1673  
1674  
1675  
1676  
1677  
1678  
1679  
1680  
1681  
1682  
1683  
1684  
1685  
1686  
1687

- [3] A. von Wright. Regulating the safety of probiotics—the European approach. *Curr Pharm Des*, 11(1):17–23, 2005.
- [4] Cincinnati Children’s Hospital. Use of Lactobacillus GG in children with acute gastroenteritis, 2011.
- [5] S. T. Li, E. J. Klein, P. I. Tarr, and D. M. Denno. Parental management of childhood diarrhea. *Clin Pediatr (Phila)*, 48(3):295–303, 2009.
- [6] WHO. Diarrhoeal Disease Fact Sheet, 2009.
- [7] CDC. CDC 2011 Estimates of Foodborne Illnesses in the United States, 2011.
- [8] M. Senecal, M. Brisson, M. H. Lebel, J. Yaremko, R. Wong, L. A. Gallant, H. A. Garfield, D. J. Ableman, R. L. Ward, J. S. Sampalis, and J. A. Mansi. Measuring the Impact of Rotavirus Acute Gastroenteritis Episodes (MIRAGE): A prospective community-based study. *Can J Infect Dis Med Microbiol*, 19(6):397–404, 2008.
- [9] CDC. Viral Gastroenteritis, 2011.
- [10] CDC. Clinical Overview Norovirus Infection, 2013.
- [11] D. Schnadower, S. B. Freedman, and P.I. Tarr. Unpublished Pilot Data for the Probiotic Study in 5 US EDs and 11 Canadian EDs, 2013.
- [12] D. Schnadower, P. Tarr, M. Gorelick, K. O’Connell, C. Roskind, E. Powell, J. Rao, S. Bhatt, and S. Freedman. Validation of the Modified Vesikari Score in Children with Gastroenteritis in 5 U.S. Emergency Departments. Submitted to *Journal of Pediatric Gastroenterology and Nutrition* (manuscript in appendix), 2013.
- [13] S. B. Freedman, M. Eltorkey, and M. Gorelick. Evaluation of a gastroenteritis severity score for use in outpatient settings. *Pediatrics*, 125(6):e1278–85, 2010.
- [14] A. E. Carroll and S. M. Downs. Improving decision analyses: parent preferences (utility values) for pediatric health outcomes. *J Pediatr*, 155(1):21–5, 25 e1–5, 2009.
- [15] EJ Elliott. Acute gastroenteritis in children. *BMJ*, 334:7583, 2007.

- 1688 [16] S. B. Freedman, S. Guin, M. Bhatt, K. J. Black, D. Johnson, C. Guimont, G. Joubert,  
1689 R. Porter, Q. Doan, R. van Wylick, S. Schuh, E. Atenafu, M. Eltorkey, D. Cho, and  
1690 A. Plint. Prospective assessment of practice pattern variations in the treatment of  
1691 pediatric gastroenteritis. *Pediatrics*, 127(2):e287–95, 2011.

- 1692  
1693  
1694  
1695 [17] S. B. Freedman, V. Sivabalasundaram, V. Bohn, E. C. Powell, D. W. Johnson, and  
1696 K. Boutis. The treatment of pediatric gastroenteritis: a comparative analysis of  
1697 pediatric emergency physicians' practice patterns. *Acad Emerg Med*, 18(1):38-45,  
1698 2011.  
1699  
1700 [18] M. G. Gareau, P. M. Sherman, and W. A. Walker. Probiotics and the gut microbiota  
1701 in intestinal health and disease. *Nat Rev Gastroenterol Hepatol*, 7(9):503-14, 2010.  
1702  
1703 [19] S. J. Allen, E. G. Martinez, G. V. Gregorio, and L. F. Dans. Probiotics for treating  
1704 acute infectious diarrhoea. *Cochrane Database of Systematic Reviews*, 11:CD003048,  
1705 2010.  
1706  
1707 [20] Abigail F. Nixon, Sandra J. Cunningham, Hillel W. Cohen, and Ellen F. Crain.  
1708 The effect of Lactobacillus GG on acute diarrheal illness in the pediatric emergency  
1709 department. *Pediatr Emerg Care*, 28(10):1048-1051, Oct 2012.  
1710  
1711 [21] H.: Szajewska, A. Skorka, M. Ruszczyński, and D. Gieruszczak-Bialek. Meta-analysis:  
1712 Lactobacillus GG for treating acute diarrhoea in children. *Aliment Pharmacol Ther*,  
1713 25(8):871-81, 2007.  
1714  
1715 [22] Y. Vandenplas, S. G. De Hert, and PROBIOTICAL Study Group. Randomised clinical  
1716 trial: the synbiotic food supplement Probiotal vs. placebo for acute gastroenteritis  
1717 in children. *Aliment Pharmacol Ther*, 34(8):862-7, 2011.  
1718  
1719 [23] S. E. Con, J. Elser, C. Marchant, M. Sawyer, B. Pollara, R. Fayorsey, L. Nelson,  
1720 D. Lawley, M. Goveia, J. Stek, D. Hille, and M. J. DiNubile. Impact of acute rotavirus  
1721 gastroenteritis on pediatric outpatient practices in the United States. *Pediatr Infect  
1722 Dis J*, 25(7):584-9, 2006.  
1723  
1724 [24] E. J. Klein, D. R. Boster, J. R. Stapp, J. G. Wells, X. Qin, C. R. Clausen, D. L.  
1725 Swerdlow, C. R. Braden, and P. I. Tarr. Diarrhea etiology in a Children's Hospital  
1726 Emergency Department: a prospective cohort study. *Clin Infect Dis*, 43(7):807-13,  
1727 2006.  
1728  
1729 [25] A. L. D'Souza, C. Rajkumar, J. Cooke, and C. J. Bulpitt. Probiotics in prevention  
1730 of antibiotic associated diarrhoea: meta-analysis. *BMJ (Clinical Research Ed.)*,  
1731 324(7350):1361, 2002.  
1732

1733 [26] C. K. King, R. Glass, J. S. Bresee, and C. Duggan. Managing acute gastroenteritis  
1734 among children: oral rehydration, maintenance, and nutritional therapy. MMWR  
1735 Recomm Rep, 52(RR-16):1-16, 2003.

1736  
1737  
1738  
1739  
1740  
1741  
1742  
1743  
1744  
1745  
1746  
1747  
1748  
1749  
1750  
1751  
1752  
1753  
1754  
1755  
  
1756  
  
1757  
1758  
1759  
1760  
1761  
1762  
1763  
1764  
1765  
1766  
1767  
1768  
1769  
1770  
1771  
1772  
1773  
1774

- [27] R. Khanna, M. Lakhanpaul, S. Burman-Roy, M. S. Murphy, Group Guideline Development, and team the technical. Diarrhoea and vomiting caused by gastroenteritis in children under 5 years: summary of NICE guidance. *BMJ*, 338:b1350, 2009.
- [28] M. B. Katan. Why the European Food Safety Authority was right to reject health claims for probiotics. *Benef Microbes*, 3(2):85–9, 2012.
- [29] V. Vero and A. Gasbarrini. The EFSA health claims ‘learning experience’. *Int J Food Sci Nutr*, 63 Suppl 1:14–6, 2012. Vero, Vittoria Gasbarrini, Antonio England International journal of food sciences and nutrition *Int J Food Sci Nutr*. 2012 Mar;63 Suppl 1:14-6. Epub 2011 Nov 16.
- [30] A. Flynn. Scientific substantiation of health claims in the EU. *Proc Nutr Soc*, 71(1):120–6, 2012.
- [31] J. T. Heimbach. Health-benefit claims for probiotic products. *Clin Infect Dis*, 46 Suppl 2:S122–4; discussion S144–51, 2008.
- [32] Markets and Markets. Global probiotics market worth us \$32.6 billion by 2014, 2012.
- [33] S Salminen, A Owehand, Y Benno, and YK Lee. Probiotics: how should they be defined? *Trend Food Sci Technol*, 10:3, 1999.
- [34] A. R. Lomax and P. C. Calder. Probiotics, immune function, infection and inflammation: a review of the evidence from studies conducted in humans. *Curr Pharm Des*, 15(13):1428–518, 2009.
- [35] L. J. Fooks and G. R. Gibson. Probiotics as modulators of the gut flora. *Br J Nutr*, 88 Suppl 1:S39–49, 2002.
- [36] D. R. Mack, S. Michail, S. Wei, L. McDougall, and M. A. Hollingsworth. Probiotics inhibit enteropathogenic *E. coli* adherence in vitro by inducing intestinal mucin gene expression. *Am J Physiol*, 276(4 Pt 1):G941–50, 1999.
- [37] S. Hudault, V. Lievin, M. F. Bernet-Camard, and A. L. Servin. Antagonistic activity exerted in vitro and in vivo by *Lactobacillus casei* (strain GG) against *Salmonella typhimurium* C5 infection. *Appl Environ Microbiol*, 63(2):513–8, 1997.

1775 [38] P. Naaber, R. H. Mikelsaar, S. Salminen, and M. Mikelsaar. Bacterial translocation,  
1776 intestinal microflora and morphological changes of intestinal mucosa in experimental  
1777 models of Clostridium difficile infection. J Med Microbiol, 47(7):591–8, 1998.

- 1778  
1779  
1780  
1781 [39] G. R. Gibson and X. Wang. Enrichment of bifidobacteria from human gut contents  
1782 by oligofructose using continuous culture. *FEMS Microbiol Lett*, 118(1-2):121-7,  
1783 1994.  
1784  
1785 [40] M. Miettinen, A. Lehtonen, I. Julkunen, and S. Matikainen. Lactobacilli and Strep-  
1786 tococci activate NF-kappa B and STAT signaling pathways in human  
1787 macrophages. *J Immunol*, 164(7):3733-40, 2000.  
1788  
1789 [41] J. M. Wong, R. de Souza, C. W. Kendall, A. Emam, and D. J. Jenkins. Colonic  
1790 health: fermentation and short chain fatty acids. *J Clin Gastroenterol*, 40(3):235-43,  
1791 2006.  
1792  
1793 [42] I. R. Sanderson. Dietary modulation of GALT. *J Nutr*, 137(11 Suppl):2557S-2562S,  
1794 2007.  
1795  
1796 [43] V. Rosenfeldt, E. Benfeldt, N. H. Valerius, A. Paerregaard, and K. F. Michaelsen.  
1797 Effect of probiotics on gastrointestinal symptoms and small intestinal  
1798 permeability  
1799 in children with atopic dermatitis. *Journal of Pediatrics*, 145(5):612-616, 2004.  
1800  
1801 [44] M. Olivares, M. P. Diaz-Ropero, N. Gomez, F. Lara-Villoslada, S. Sierra, J. A.  
1802 Maldonado, R. Martin, J. M. Rodriguez, and J. Xaus. The consumption of two new  
1803 probiotic strains, *Lactobacillus gasseri* CECT 5714 and *Lactobacillus coryniformis*  
1804 CECT 5711, boosts the immune system of healthy humans. *Int Microbiol*, 9(1):47-52,  
1805 2006.  
1806  
1807 [45] B. L. Chiang, Y. H. Sheih, L. H. Wang, C. K. Liao, and H. S. Gill. Enhancing immunity  
1808 by dietary consumption of a probiotic lactic acid bacterium (*Bifidobacterium lactis*  
1809 HN019): optimization and definition of cellular immune responses. *Eur J Clin Nutr*,  
1810 54(11):849-55, 2000.  
1811  
1812 [46] C. Mullie, A. Yazourh, H. Thibault, M. F. Odou, E. Singer, N. Kalach, O. Kremp, and  
1813 M. B. Romond. Increased poliovirus-specific intestinal antibody response coincides  
1814 with promotion of *Bifidobacterium longum-infantis* and *Bifidobacterium breve* in  
1815 infants: a randomized, double-blind, placebo-controlled trial. *Pediatr Res*, 56(5):791-  
1816 5, 2004.  
1817

- 1818 [47] E. Tiollier, M. Chennaoui, D. Gomez-Merino, C. Drogou, E. Filaire, and C. Y. Guezen-  
1819 nec. Effect of a probiotics supplementation on respiratory infections and immune  
1820 and hormonal parameters during intense military training. *Mil Med*, 172(9):1006-11,  
1821 2007.

1822  
 1823  
 1824  
 1825  
 1826  
 1827  
 1828  
 1829  
 1830  
 1831  
 1832  
 1833  
 1834  
 1835  
 1836  
 1837  
 1838  
 1839  
 1840  
 1841  
 1842  
 1843  
 1844  
 1845  
 1846  
 1847  
 1848  
 1849  
 1850  
 1851  
 1852  
 1853  
 1854  
 1855  
 1856  
 1857  
 1858  
 1859  
 1860  
 1861  
 1862  
 1863  
 1864  
 1865

- [48] M. Rinne, M. Kalliomaki, H. Arvilommi, S. Salminen, and E. Isolauri. Effect of probiotics and breastfeeding on the bifidobacterium and lactobacillus/enterococcus microbiota and humoral immune responses. *J Pediatr*, 147(2):186–91, 2005.
- [49] J. Z. Szajewska, H.: Mrukowicz. Probiotics in the treatment and prevention of acute infectious diarrhea in infants and children: a systematic review of published randomized, double-blind, placebo-controlled trials. *J Pediatr Gastroenterol Nutr*, 33 Suppl 2:S17–25, 2001.
- [50] C. W. Van Niel, C. Feudtner, M. M. Garrison, and D. A. Christakis. Lactobacillus therapy for acute infectious diarrhea in children: a meta-analysis. *Pediatrics*, 109(4):678–84, 2002.
- [51] J. S. Huang, A. Bousvaros, J. W. Lee, A. Diaz, and E. J. Davidson. Efficacy of probiotic use in acute diarrhea in children: a meta-analysis. *Dig Dis Sci*, 47(11):2625–34, 2002.
- [52] S. J. Allen, B. Okoko, E. Martinez, G. Gregorio, and L. F. Dans. Probiotics for treating infectious diarrhoea. *Cochrane Database Syst Rev*, (2):CD003048, 2004.
- [53] B. C. Johnston, L. Shamseer, B. R. da Costa, R. T. Tsuyuki, and S. Vohra. Measurement issues in trials of pediatric acute diarrheal diseases: a systematic review. *Pediatrics*, 126(1):e222–31, 2010.
- [54] S. Guandalini. Probiotics for children with diarrhea: an update. *Journal of clinical gastroenterology*, 42 Suppl 2:S53–57, 2008.
- [55] Daniel C. Payne, Mary Allen Staat, Kathryn M. Edwards, Peter G. Szilagyi, Jon R. Gentsch, Lauren J. Stockman, Aaron T. Curns, Marie Gri n, Geoffrey A. Weinberg, Caroline B. Hall, Gerry Fairbrother, James Alexander, and Umesh D. Parashar. Active, population-based surveillance for severe rotavirus gastroenteritis in children in the United States. *Pediatrics*, 122(6):1235–1243, Dec 2008.
- [56] H. Szymanski, J. Pejcz, M. Jawien, A. Chmielarczyk, M. Strus, and P. B. Heczko. Treatment of acute infectious diarrhoea in infants and children with a mixture of three *Lactobacillus rhamnosus* strains - A randomized, double-blind, placebo-controlled trial. *Alimentary Pharmacology and Therapeutics*, 23(2):247–253, 2006.
- [57] Donna M. Denno, Nurmohammad Shaikh, Jenny R. Stapp, Xuan Qin, Carolyn M. Hutter, Valerie Hoffman, Jody C. Mooney, Kelly M. Wood, Harold J. Stevens, Robert

1866 Jones, Phillip I. Tarr, and Eileen J. Klein. Diarrhea etiology in a pediatric emergency  
1867 department: a case control study. Clin Infect Dis, 55(7):897-904, Oct 2012.

- 1868  
1869  
1870  
1871 [58] L. Vernacchio, R. M. Vezina, A. A. Mitchell, S. M. Lesko, A. G. Plaut, and D. W.  
1872 Acheson. Diarrhea in American infants and young children in the community setting:  
1873 incidence, clinical presentation and microbiology. *Pediatr Infect Dis J*, 25(1):2-7,  
1874 2006.  
1875  
1876 [59] D. M. Denno, J. R. Stapp, D. R. Boster, X. Qin, C. R. Clausen, K. H. Del Beccaro,  
1877 D. L. Swerdlow, C. R. Braden, and P. I. Tarr. Etiology of diarrhea in pediatric  
1878 outpatient settings. *Pediatr Infect Dis J*, 24(2):142-8, 2005.  
1879  
1880 [60] T. Ruuska and T. Vesikari. Rotavirus disease in Finnish children: use of numerical  
1881 scores for clinical severity of diarrhoeal episodes. *Scand J Infect Dis*, 22(3):259-67,  
1882 1990.  
1883  
1884 [61] M. Fruehwirth, U. Heininger, B. Ehlken, G. Petersen, B. Laubereau, I. Moll-Schler,  
1885 I. Mutz, and J. Forster. International variation in disease burden of rotavirus  
1886 gastroenteritis in children with community- and nosocomially acquired infection.  
1887 *Pediatr Infect Dis J*, 20(8):784-791, Aug 2001.  
1888  
1889 [62] Noga Givon-Lavi, David Greenberg, and Ron Dagan. Comparison between two  
1890 severity scoring scales commonly used in the evaluation of rotavirus gastroenteritis  
1891 in children. *Vaccine*, 26(46):5798-5801, Oct 2008.  
1892  
1893 [63] G. M. Ruiz-Palacios, I. Perez-Schael, F. R. Velazquez, H. Abate, T. Breuer, S. C.  
1894 Clemens, B. Cheuvart, F. Espinoza, P. Gillard, B. L. Innis, Y. Cervantes, A. C.  
1895 Linhares, P. Lopez, M. Macias-Parra, E. Ortega-Barria, V. Richardson, D. M. Rivera-  
1896 Medina, L. Rivera, B. Salinas, N. Pavia-Ruz, J. Salmeron, R. Ruttimann, J. C. Tinoco,  
1897 P. Rubio, E. Nunez, M. L. Guerrero, J. P. Yarzabal, S. Damaso, N. Tornieporth,  
1898 X. Saez-Llorens, R. F. Vergara, T. Vesikari, A. Bouckennooghe, R. Clemens, B. De Vos,  
1899 M. O’Ryan, and Group Human Rotavirus Vaccine Study. Safety and efficacy of an  
1900 attenuated vaccine against severe rotavirus gastroenteritis. *N Engl J Med*, 354(1):11-  
1901 22, 2006.  
1902  
1903 [64] M. Iturriza Gomara, R. Simpson, A. M. Perault, C. Redpath, P. Lorgelly, D. Joshi,  
1904 M. Mugford, C. A. Hughes, J. Dalrymple, U. Desselberger, and J. Gray. Structured  
1905 surveillance of infantile gastroenteritis in East Anglia, UK: incidence of infection  
1906 with common viral gastroenteric pathogens. *Epidemiol Infect*, 136(1):23-33, 2008.  
1907  
1908 [65] J. Diez-Domingo, J. M. Baldo, M. Patrzalek, P. Pazdiora, J. Forster, L. Cantarutti,  
1909 J. Y. Pircon, M. Soriano-Gabarro, and N. Meyer. Primary care-based surveillance

1910 to estimate the burden of rotavirus gastroenteritis among children aged less than 5  
1911 years in six European countries. *Eur J Pediatr*, 170(2):213–22, 2011.

1912  
 1913  
 1914  
 1915  
 1916  
 1917  
 1918  
 1919  
 1920  
 1921  
 1922  
 1923  
 1924  
 1925  
 1926  
 1927  
 1928  
 1929  
 1930  
 1931  
 1932  
 1933  
 1934  
 1935  
 1936  
 1937  
 1938  
 1939  
 1940  
 1941  
 1942  
 1943  
 1944  
 1945  
 1946  
 1947  
 1948  
 1949  
 1950  
 1951  
 1952  
 1953  
 1954

[66] I. Pruvost, F. Dubos, E. Chazard, V. Hue, A. Duhamel, and A. Martinot. The value of body weight measurement to assess dehydration in children. *PLoS One*, 8(1):e55063, 2013.

[67] H. I. Huppertz, J. Forster, U. Heininger, R. Roos, H. U. Neumann, and T. Hammer-schmidt. The parental appraisal of the morbidity of diarrhea in infants and toddlers (PAMODI) survey. *Clin Pediatr (Phila)*, 47(4):363–71, 2008.

[68] Eileen L. Yee, Mary Allen Staat, Parvin Azimi, David I. Bernstein, Richard L. Ward, Charles Schubert, David O. Matson, Reina M. Turcios-Ruiz, Umesh Parashar, Marc-Alain Widdowson, and Roger I. Glass. Burden of rotavirus disease among children visiting pediatric emergency departments in Cincinnati, Ohio, and Oakland, California, in 1999-2000. *Pediatrics*, 122(5):971–977, Nov 2008.

[69] M. H. Gorelick, K. N. Shaw, and K. O. Murphy. Validity and reliability of clinical signs in the diagnosis of dehydration in children. *Pediatrics*, 99(5):E6, 1997.

[70] S. B. Freedman, M. Adler, R. Seshadri, and E. C. Powell. Oral ondansetron for gastroenteritis in a pediatric emergency department. *N Engl J Med*, 354(16):1698–705, 2006.

[71] A. C. Plint, D. W. Johnson, H. Patel, N. Wiebe, R. Correll, R. Brant, C. Mitton, S. Gouin, M. Bhatt, G. Joubert, K. J. Black, T. Turner, S. Whitehouse, and T. P. Klassen. Epinephrine and dexamethasone in children with bronchiolitis. *New England Journal of Medicine*, 360(20):2079–89, 2009.

[72] N. Nagelkerke, V. Fidler, R. Bernsen, and M. Borgdorff. Estimating treatment effects in randomized clinical trials in the presence of non-compliance. *Stat Med*, 19(14):1849–1864, Jul 2000.

[73] J. Joensuu, E. Koskenniemi, X. L. Pang, and T. Vesikari. Randomised placebo-controlled trial of rhesus-human reassortant rotavirus vaccine for prevention of severe rotavirus gastroenteritis. *Lancet*, 350(9086):1205–1209, Oct 1997.

[74] Candan Cicek, Tuba Karatas, Imre Altuglu, Guldane Koturoglu, Zafer Kurugol, and Altinay Bilgic. Comparison of ELISA with shell vial cell culture method for the detection of human rotavirus in fecal specimens. *New Microbiol*, 30(2):113–118, Apr 2007.

[75] T. Vesikari, T. Ruuska, A. Delem, F. E. Andre, G. M. Beards, and T. H. Flewett.

1955           Efficacy of two doses of RIT 4237 bovine rotavirus vaccine for prevention of rotavirus  
1956           diarrhoea. Acta Paediatr Scand, 80(2):173-80, 1991.

1957  
 1958  
 1959  
 1960  
 1961  
 1962  
 1963  
 1964  
 1965  
 1966  
 1967  
 1968  
 1969  
 1970  
 1971  
 1972  
 1973  
 1974  
 1975  
 1976  
 1977  
 1978  
 1979  
 1980  
 1981  
 1982  
 1983  
 1984  
 1985  
 1986  
 1987  
 1988  
 1989  
 1990  
 1991  
 1992  
 1993  
 1994  
 1995  
 1996

[76] Fred N. Binka, Francis K. Anto, Abraham R. Oduro, Elizabeth A. Awini, Alex K. Nazzar, George E. Armah, Richard H. Asmah, Andrew J. Hall, Felicity Cutts, Neal Alexander, David Brown, Jon Green, Jim Gray, Miren Iturriza-Gûmara, and Navrongo Rotavirus Research Group . Incidence and risk factors of paediatric rotavirus diarrhoea in northern Ghana. *Trop Med Int Health*, 8(9):840-846, Sep 2003.

[77] S. Holm. A simple sequentially rejective multiple test procedure. *Scand J Stat*, 6:65-70, 1979.

[78] P. Van Elteren. On the combination of independent two-sample tests of Wilcoxon. *Bull Internat Stat Inst*, 37:351-361, 1960.

[79] J Fleiss. *Statistical Methods for Rates and Proportions*. John Wiley & Sons, 2nd edition, 1981.

[80] H. M. Corneli, J. J. Zorc, P. Mahajan, K. N. Shaw, R. Holubkov, S. D. Reeves, R. M. Ruddy, B. Malik, K. A. Nelson, J. S. Bregstein, K. M. Brown, M. N. Denenberg, K. A. Lillis, L. B. Cimpello, J. W. Tsung, D. A. Borgialli, M. N. Baskin, G. Teshome, M. A. Goldstein, D. Monroe, J. M. Dean, and N. Kuppermann. A multicenter, randomized, controlled trial of dexamethasone for bronchiolitis. *N Engl J Med*, 357(4):331-9, 2007.

[81] M. Rosenblum and M. J. Van der Laan. Optimizing randomized trial designs to distinguish which subpopulations benefit from treatment. *Biometrika*, 98(4):845-860, 2011.

[82] W. J. Meurer, R. J. Lewis, and D. A. Berry. Adaptive clinical trials: a partial remedy for the therapeutic misconception? *JAMA*, 307(22):2377-8, 2012.

[83] D. Moher, S. Hopewell, K. F. Schulz, V. Montori, P. C. Gotzsche, P. J. Devereaux, D. Elbourne, M. Egger, and D. G. Altman. CONSORT 2010 explanation and elaboration: updated guidelines for reporting parallel group randomised trials. *BMJ (Clinical Research Ed.)*, 340:c869, 2010.

[84] J. A. Lewis and D. Machin. Intention to treat-who should use ITT? *Br J Cancer*, 68(4):647-50, 1993.

1997 [85] M. Marshall, A. Lockwood, C. Bradley, C. Adams, C. Joy, and M. Fenton. Un-  
1998 published rating scales: a major source of bias in randomised controlled trials of  
1999 treatments for schizophrenia. Br J Psychiatry, 176:249-52, 2000.

2000  
2001  
2002  
2003  
2004  
2005  
2006  
2007  
2008  
2009  
2010

[86] Eduardo Salazar-Lindo, Dante Figueroa-Quintanilla, Maria Isabel Caciono, Victoria Reto-Valiente, Gilles Chauviere, Patrick Colin, and Lacteol Study Group . Effectiveness and safety of Lactobacillus LB in the treatment of mild acute diarrhea in children. *J Pediatr Gastroenterol Nutr*, 44(5):571–576, May 2007.

[87] N. Dendukuri, V. Costa, M. McGregor, and J. M. Brophy. Probiotic therapy for the prevention and treatment of Clostridium difficile-associated diarrhea: a systematic review. *CMAJ*, 173(2):167–70, 2005.
