# Supplementary material for: Variables Associated With Intravenous Rehydration and Hospitalization in Children With Acute Gastroenteritis: A Secondary Analysis of 2 Randomized Clinical Trials
Source: PubMed Central journal article supplement (PMC8056281; doi:10.1001/jamanetworkopen.2021.6433), 2021-04-19
Supplement: jamanetwopen-e216433-s004.pdf [file jamanetwopen-e216433-s004.pdf]

## Data Sharing Statement

Poonai. Variables Associated With Intravenous Rehydration and Hospitalization in Children With Acute Gastroenteritis. *JAMA Netw Open*. Published April 19, 2021.

doi:10.1001/jamanetworkopen.2021.6433

### Data

**Data available:** No
